# Supplementary material
Source: PubMed Central journal article supplement (PMC4500108)
Supplement: NIHMS706206-supplement-Sup_merged.pdf [file NIHMS706206-supplement-Sup_merged.pdf]

## Methods

### Animal Husbandry, behavioral testing and behavioral measures

All behavioral methods have been previously published (24). C57BL/6J (stock number 000664) mice were obtained from Jackson Laboratory (Bar Harbor, ME). C57BL/6N were obtained from NCI-Frederick (Stock 01C55) (25). All mice were housed in barrier SPF conditions with LD (12:12) according to University of Texas, Southwestern Medical Center (UTSW) IACUC guidelines. Only mice bred at UTSW were used in the study. Animals (10-14 weeks of age) were allowed to acclimate to the testing room for half an hour prior to behavioral testing. Mice were weighed and visually inspected for low body weight or any other developmental problems such as malocclusion. Any mouse deemed to be abnormal was removed from the screen. Mice were placed in a 55cm x 55cm x 36cm (Width x Length x Height) matrix for open field assay for 30 minutes followed by intraperitoneal injection with cocaine solution in 0.9% saline. Florescent light levels were measured at 700 lux +/- 56 lux (mean +/- SD of all 32 chambers in our testing facility). Ultrafine insulin syringes were used for injection of cocaine (3/10 mL BD Lo-Dose, Cat 328438). Following each test the test chamber was cleaned with dilute Quatricide solution. Testing was carried out between zeitgeber time (ZT) 4 and ZT10. Actimetrics LimeLight software was used for behavioral recording.

Velocity (mm/min) was measured during baseline (30 minutes before injection, referred to as -30 to 0) and post injection period (60 minutes of recording referred to as 0 to 60 minutes). The baseline measure is an average velocity over the 25 minutes (-30 to -5 minutes). The 30 minutes and 60 minute responses is a sum of 5-minute averages after injection. The net response was calculated by subtracting the average baseline velocity from the average velocity of 30 minutes post injection.

We tested C57BL/6J and C57BL/6N mice for sensitized responses to cocaine by injecting the mice with saline for 4 days, cocaine (10 or 15mg/kg) for 6 days, a saline challenge, and then a cocaine challenge at day 17 and 24

### *Cyfp2* knockout

The *Cyfp2*<sup>tm1a(EUCOMM)Wtsi</sup> (ID:33461) ES cells are derived from the C57BL/6N strain and were maintained in the same background through the course of our experiments. *Cyfp2* knockout ES cells were obtained from EUCOMM. *Cyfp2*<sup>tm1a(EUCOMM)Wtsi</sup> ES clones EPD0436\_2\_B03, EPD0436\_2\_H02, EPD0436\_2\_A04 were obtained after quality control testing. ES cells were expanded and microinjected into blastocysts by the UTSW core transgenic technology center. Chimeric mice were bred and germline transmission was obtained for two lines (A04 and H02). Data in this paper are from the A04 ES cell line. After intercrossing heterozygote carriers, we only recovered homozygous wild type and heterozygous knockouts. Genotyping of dead pups and E20 harvested embryos revealed knockouts were dying soon after birth or during gestation. We confirmed that *Cyfp2* mRNA is specifically reduced in homozygous and heterozygous knockout mice collected during gestation (fig. S16).

The knockout allele was genotyped by PCR with the following primers. Wild type allele was amplified with CyKO-1S and CyKO-1AS, yielding a 1.2 kb band. The knockout allele was amplified with CyKO-3S and CyKO-3AS yielding a 719 bp band.

CyKO-1S AGC CTC ATG CTT CCT TAG GCC TCC CAC AGC TTC AGG  
CyKO-1AS AAT GCG GCC ACT GGG GTA ACT GGG GTA ATG TAT GCC  
CyKO-3S TGG AGT GCT GGG TCA CTT AGT GAA TGC ACC  
CyKO-3AS AGA CCT TGG GAC CAC CTC ATC AGA AGC AGG

DNA was prepared using phenol extraction and PCR was performed with HotStart Taq with the following cycles – 95°C 3min, 30 cycles of 95°C (15 sec), 64°C (15 sec), 72°C (2 min), 1 cycle of 72°C (10 min).

### **Discovery of C57BL/6N polymorphic markers**

We searched for private C57BL/6J mutations reasoning that many of these would have arisen after C57BL/6J and C57BL/6N diverged through genetic drift. Laboratory strains of mice have genomes composed of limited number of mosaic haplotype blocks from progenitor species (26). Through the efforts of the mouse genetics community many strains have been genotyped at very high density and the data archived (27). If a SNP was ancestral then it would exist in multiple strains that share a haplotype block due to identity by descent. However, if a SNP is unique to C57BL/6J, then it must have arisen through genetic drift after C57BL/6J diverged from the other strains. We used two large datasets consisting of approximately 800,000 SNP genotypes from over 50 strains from the Broad Institute (Broad 2) (28) and the Center for Genome Dynamics (snp\_cgd2\_b37) (29) to find such SNPs (fig. S5). This approach is powerful and can be applied towards the discovery of private polymorphisms between any mouse substrains. For the experimental approach we genotyped C57BL/6N on the Mouse Diversity Array (13). Using these two approaches we constructed a panel of 93 polymorphic markers between C57BL/6N and C57BL/6J (Fig. 2B, Table S1). Of these 93 markers 23 were polymorphic between the current C57BL/6J mice and a stock of C57BL/6J DNA from 1984 (Table S2).

### **QTL analysis**

QTL analysis was carried out using R/QTL (30). Interval mapping was performed using scanone function with Haley-Knott regression. Significance thresholds were established using 100,000 permutations tests. QTL effect was estimated using fitqtl command (31). We determined the QTL support interval by using 1.5 LOD drop (32) and Bayesian 95% confidence interval (33) (fig.S8). Because the 1.5 LOD was more conservative (larger), we used 21 cM-34 cM of chromosome 11 as the location of the QTL. The QTL support interval translates to a 22 Mb interval between 35 Mb-57 Mb of chromosome 11 (12)

### **SNP genotyping**

Taqman probes were designed by ABI and tested on the Fluidigm platform and all C57BL/6J-C57BL/6N F2 DNA were genotyped on this platform using the 96.96 chip according to manufacturer instructions (34, 35). DNA from tails were prepared using phenol extraction. Mouse Diversity Array Array data can be downloaded here as a CEL file - <http://cgd.jax.org/datasets/diversityarray/CELfiles.shtml>.

### **Next Generation Sequence Analysis**

The UTSW McDermott Sequencing Core Facility performed one mate pair and one paired end run on the ABI SOLiD platform. We obtained two C57BL/6NJ sequencing



### **Protein Interaction Assays**

Stable HEK293 cell lines expressing equivalent levels of FLAG-CYFIP2 wild type or S968F mutation were established according to standard protocols. All immunoprecipitation (IP) and proteomics studies were carried out in these cell lines.

Immunoprecipitations were performed as previously described (43). Cells were extracted with EB containing 20 mM HEPES, 150 mM NaCl, 0.1% Triton X-100, 5 mM sodium beta-glycerophosphate, 0.5 mM orthovanadate, 5 mM sodium fluoride, 1 mM EDTA, 1 mM PMSF, and Complete protease inhibitors. IPs were done using anti-FLAG M2 magnetic beads. Following binding the beads were washed with EB buffer. Western blots were carried out using the following antibodies HSPC300 (Abcam, ab87449), NAP1 (Sigma, N3788), DYKDDDK (Cell Signaling, 2368), FLAG (Sigma, M2, F1804), ABI2 (Epitomics, 5397-1), WAVE1 (NeuroMab, 75-048), beta-Tubulin (Li-Cor, 926-42211). Secondary IR conjugated anti-rabbit (827-11081) and anti-mouse (827-08364 (Li-Cor) were used according to instructions. All quantitative immunoprecipitation was quantitated out using the Li-Cor Odyssey imaging system.

Proteomics studies were carried out by immunoprecipitating FLAG-CYFIP2 WT or mutant from 30-15 cm plates of HEK293 stable cell lines. As control equivalent cells with no expression of FLAG CYFIP2 was used. Cells were extracted under mild conditions with EB and the extract was incubated with 1ml FLAG M2 magnetic beads. The beads were washed, boiled and loaded onto NuPAGE gels. After separation each lane was separated into 10 fractions and submitted for mass spectrometry according to standard techniques (UTSW spectrometry spec core). Proteins that were enriched at least 5 fold when compared to control IP were considered as true interactions.

### **Protein Stability Assays**

*FLAG-Cyfp2* wild type or mutant were transiently transfected into HEK293 cells plated in 12 well plates. 100 ng/well and 200 ng/well of expression plasmid was transfected using Effectene in triplicate. 32 hours later the transfected cells were treated with cycloheximide (100 ug/ml) for the indicated times and harvested. Following harvesting cells were lysed with EB and subjected to western blot with anti-FLAG M2 antibody (Sigma M2, F1804) and beta-tubulin (Li-Cor, 926-42211). Secondary IR conjugated antibody was used for quantitative western blots. The blots were scanned with Li-Cor Odyssey imaging system. The relative amount of signal (fraction of signal as compared with time 0) was calculated across all experiments and replicates to calculate the degradation curve. Statistical model for one phase exponential decay was used in Prism to calculate the  $T_{1/2}$  (44).

### **Spine imaging**

Ballistic “diolistic” labeling of nucleus accumbens (NAc) neurons were carried out in animals between 51 and 63 days as described previously (45) with the following modifications. Animals were anesthetized with Euthasol (0.1-0.3 ml) perfused with cold saline (20 mls) followed by cold 2% paraformaldehyde in PBS (40 mls). Brain was removed and post fixed for 2-3 hours in 2% paraformaldehyde at 4°C. The brains were rinsed with PBS and stored overnight in PBS containing 0.1% sodium azide. The following day the brain was sectioned into 200  $\mu$ M coronal sections. Sections encompassing the NAc (+1.42  $\pm$  0.25 mm anterior to bregma) were collected into PBS

with 0.1% sodium azide. The sections were shot with tungsten bullets coated with DiO and the dye was allowed to diffuse overnight at 4°C. The following day, the sections were post-fixed for 2 hour in 4% paraformaldehyde and mounted using Fluor-Save onto slides with 120  $\mu$ M spacers. Individually isolated and well-labeled medium spiny neurons within the NAc shell or core were imaged within 48 hours of mounting using a confocal microscope with a 63X (NA1.4) oil immersion lens. Z-stacks of 0.3  $\mu$ M steps were acquired with frame size of 512 x 512 pixel resolution. The images were deconvolved using AutoquantX3 and spines were classified using NeuronStudio (46, 47). In our analysis we attempted to use conditions and methods as described by the Morrison lab (48, 49). At least 6 animals were analyzed for each strain and at least 10 images from 3 independent cells were imaged for each animal.

### **Electrophysiology**

Sagittal slices of the NAc shell (250  $\mu$ m) were prepared as described previously (50). Slices recovered in a holding chamber for at least 1 h before use. During recording they were superfused with ACSF (31.5–32.5°C) saturated with 95% O<sub>2</sub>/5% CO<sub>2</sub> and containing (in mM) 119 NaCl, 2.5 KCl, 1.0 NaH<sub>2</sub>PO<sub>4</sub>, 1.3 MgSO<sub>4</sub>, 2.5 CaCl<sub>2</sub>, 26.2 NaHCO<sub>3</sub> and 11 glucose. Picrotoxin (100  $\mu$ M) was added to block GABA<sub>A</sub> receptor-mediated IPSCs. Cells were visualized using infrared-differential interference contrast optics. Medium spiny neurons were identified by their morphology and high resting membrane potential (-75 to -85 mV). To assess excitatory synaptic transmission, miniature EPSCs (>200 per cell) were collected in the presence of TTX (0.5  $\mu$ M). Neurons were voltage clamped at -80 mV using a Multiclamp 700B amplifier. Electrodes (2.5–3.5 M $\Omega$ ) contained 117 mM cesium gluconate, 2.8 mM NaCl, 20 mM HEPES, 0.4 mM EGTA, 5 mM tetraethylammonium-Cl, 2 mM MgATP, and 0.3 mM MgGTP, pH 7.2–7.4 (285–295 mOsm). Series resistance (10–20 M $\Omega$ ) and input resistance were monitored on-line with a 4 mV depolarizing step (100 ms) given with each sweep. Data were filtered at 2 kHz, digitized at 5 kHz, and collected with Clampex 10.3 software. Quantal events were analyzed using Minianalysis software and verified by eye. During the recording days, a similar amount of data was collected from B6J and B6N substrains. Results are presented as mean  $\pm$  SEM. Statistical significance was assessed using two-tailed Student's t tests.

## **Supplementary Results and Discussion**

### **Modeling of the CYFIP2 S968F mutation.**

To estimate the change in stability of the mutant CYFIP2 protein we utilized FOLD-X software that uses the atomic coordinate data combined with experimentally derived force field measurements to predict a change in free energy of the variant protein (51). We modeled the S968F variant in the CYFIP1 crystal structure and CYFIP2 homology model, which calculated a free energy increase of 17.37 kcal/mol for CYFIP1 and 11.56 kcal/mol for CYFIP2, both predicted to severely destabilize the protein (fig. S14). Because S968 is highly conserved and a substitution of phenylalanine at this position destabilizes the protein we refer to this variant as a mutation.

### **CYFIP2 proteomic analysis**

In addition to quantitative IPs with known CYFIP1/2 interacting proteins, we carried out unbiased proteomics analysis of the CYFIP2 interactome. We fractionated FLAG immunoaffinity purified complex and identified the proteins through mass spectrometry analysis. We identified 19 proteins that specifically interact with either WT or mutant CYFIP2 protein. Genemania (52) network analysis revealed that we specifically identified 19 of 38 known CYFIP2 interaction network components, including all components of the WAVE complex (fig. S15). Lack of significant difference between the interactome of WT and mutant protein led us to conclude that the mutant protein is less stable, but can still interact with its partners.

### **Supplementary Discussion.**

CYFIP2 is a key regulator of cocaine response and a mutation in the C57BL/6N lineage leads to lowered acute and sensitized response to cocaine. CYFIP acts through at least two pathways – FMRP and the WAVE complex, both previously shown to regulate neuronal connectivity and behavior. Furthermore in zebrafish and *Drosophila*, *Cyfip* controls axon guidance, and haploinsufficiency of *Cyfip1* in mice leads to autism and schizophrenia like phenotypes (53-55). Recent data indicates that Rac1, which is upstream of WAVE signaling (16, 56), is an inhibitor of cocaine response through the cofillin pathway (57). The exact role of the cytoskeleton regulating enzymes in drug addiction remains elusive with contradictory evidence (58). These data argue that B6N has lower number of spines, the major sites of excitatory signaling, leading to compromised glutamate signaling. Glutamatergic signaling is inextricably linked with the dopaminergic pathways in cocaine response and addiction through regulation of plasticity (59, 60). Although CYFIP2 is a novel regulator of cocaine response, it remains to be seen if it translates to other classes of drugs or whether it has an effect in a true addiction paradigm test such as self-administration.

## Supplemental Figure Legends

**Fig S1:** Cocaine response is lower in C57BL/6N (B6N) than in C57BL/6J (B6J) at multiple doses and measures. 30 minute post injection response for 5, 10, 15, and 20mg/kg dose (A). Sixty minutes post injection response for 5, 10, 15, and 20 mg/kg dose (B). Net Response at 5, 10, 15 and 20 mg/kg (C).

**Fig S2:** Breeding scheme of QTL cross to map the causative locus that regulates cocaine response difference between C57BL/6J and C57BL/6N. The parental and F1 generations are isogenic and the F2 is segregating. The three-generation cross generated 270 F2s that were genotyped and phenotyped. Animals from all three generations were phenotyped concurrently.

**Fig S3:** 30 minute post injection phenotype distribution of animals generated for QTL mapping.

**Fig S4:** Phenotype distribution of animals generated for QTL mapping separated by sex. There is no effect of sex.

**Fig S5:** Examples of private B6J SNPs. We used two large datasets consisting of approximately 800,000 SNP genotypes from over 50 strains from the Broad Institute (Broad 2) and the Center for Genome Dynamics (snp\_cgd2\_b37) to find such SNPs (fig. S6). Data were downloaded from <http://phenome.jax.org/db/q?rtn=snp/chooseproj&handle=doc>.

**Fig S6:** QTL scan of all measured phenotypes. 30 minute (A), 60 minute (B), net response (C), and baseline activity (D) are shown. The QTL on chromosome 11 is specific for cocaine response (A-C) and is not seen for baseline activity (D). All significance thresholds are based on 100,000 permutation tests.

**Fig S7:** Heritability and percent of total phenotypic variance accounted for by the Chr 11 QTL. The total variance in the F2 population is due to genetic and environmental effects. Modeling of the *Cyfp2* locus using *fitqtl* command in RQTL indicates that this the Chr11 QTL explains 11% of the total variance (genetic and non-genetic). We estimated the variance (environment) using the F1 and parental B6J and B6N population data shown in Figure 2A. Using the formulas below, the heritability of the phenotype is 18.1% and the *Cyfp2* locus explains 11/18 or 61% of the phenotypic variance due to genetics. All evidence suggests that the *Cyfp2* locus is the major genetic contributor to the trait under our experimental conditions.

**Fig S8:** QTL support interval. The 1.5LOD drop support interval (top) and 95% Bayesian support interval (bottom). Since the 1.5LOD support interval is larger, we used this as the location of the QTL.

**Fig S9:** Venn Diagrams showing overlaps in variant discovered through next generation sequencing. We used three datasets for a 100X coverage of chromosome 11, Sanger Center 17 strain sequence that is published (SangerOld), Sanger Center new unpublished sequence of B6NJ (SangerNew), and our own data generated at University of Texas, Southwestern Medical Center (UTSW). We considered any variant that is seen in at least two of the three datasets for SNP and Indel. All structural variants were considered. The exact location of each variant is provided in Table 4.

**Fig S10:** Next generation sequencing identifies a single nonsynonymous polymorphism in *Cyfp2*. C57BL/6N sequence data from three sources were combined to yield almost 100-fold coverage of chromosome 11. Classification of SNP (A), indels (B), and structural variants (C) from sequencing reveals only a single SNP (top row of A) in CYFIP2 (D) that changes Serine 968 to phenylalanine in C57BL/6N. Entire Chromosome 11 is shown.

**Fig S11:** PolyPhen-2 output indicating the S968F mutation is considered damaging.

Fig S12: *In situ* expression data from the Allen Brain Atlas of adult mouse brain. *Cyfp2* is broadly expressed throughout the brain where as *Cyfp1* is restricted to the hippocampus and cerebellum.

**Fig S13:** CYFIP2 S968F mutation occurs in a conserved residue and destabilizes the protein. (A) Serine 968 (red) of CYFIP2 is highly conserved in the CYFIP family. (B) S968 paralog in CYFIP1 (S969 red), shown using the WAVE complex crystal structure. CYFIP1 is shown in green with VDW surface rendering and NAP1 in white, and the inset shows helices 50, 51 and 39 that surround S968. (C) Molecular modeling to replace the S969 (left) with phenylalanine (right) leads to steric clashes with neighboring residues (pink).

**Fig S14:** FoldX prediction of free energy change caused by S969F mutation modeled in CYFIP1 (top) and S968F modeled in CYFIP2 (bottom).

**Fig S15:** Proteomics analysis of the CYFIP2 interactome. HEK293 cell lines expressing either the WT (B6J) , mutant (B6N) or neither (Control) were used for immunoprecipitation with anti FLAG antibody. The complex was separated on SDS-PAGE gel and cut into 10 fractions. Each fraction was subjected to mass-spectral analysis (left). The enriched proteins that specifically bound to CYFIP2 WT or mutant were analyzed using Genemania network analysis (right). The circles are known interactors of CYFIP, with the size of the circle representing the relative confidence of interaction. The colors represent the enrichment in WT (Blue) or mutant (Red) CYFIP2 (Green). For instance CYFIP1 is seen to equally interact with WT and mutant CYFIP2, but MYO18A is enriched more in WT than mutant pulldown. Analysis was carried out in Cytoscape using the Genemania plugin.

*Cyfp1* - <http://mouse.brain-map.org/experiment/show/69014410>

*Cyfp2* - <http://mouse.brain-map.org/gene/show/52724>

**Fig S16:** Quantitive rtPCR confirms lack of *Cyfp2* transcript in the knockout mice. Whole brain RNA was isolated from embryos (e18 and e21). Two animals of each genotype were used in this assay. Taqman probes for *Med7* (Mm00502970), *Adam19* (Mm00477337), *Cyfp2* (Mm00460148), *GAPDH* (Mm99999915) were obtained from Life Technologies.

**Fig S17:** The rate of cocaine metabolism is identical in C57BL/6J and C57BL/6N. Cocaine metabolism was monitored by quantiating the production of benzoylecgonine after drug administration. Mice were intraperitoneally injected with Cocaine (20mg/kg) and blood was harvested by bleeding of the submandibular vein with Goldenrod Animal Lancet (Medipoint Inc) at the indicated times. Two mice were used from each strain for



each time point. Serum was used to quantitate benzoylecgonine using an ELISA kit (catalog number KA0929, Abnova).

### **Supplementary Tables Legends**

**Table 1:** Polymorphic Markers used in QTL mapping.

Table 2: Polymorphic Markers between current C57BL/6J and DNA from 1984 stock of C57BL/6J.

**Table 3:** Next generation sequencing coverage statistics.

**Table 4:** Classification of all variants on chromosome 11 between C57BL/6N and C57BL/6J. There are three sheets that contain SNPs, indels and structural variants.

**Table 5:** Genome wide variant classification between C57BL/6N and C57BL/6J. There are three sheets that contain SNPs, indels and structural variants.

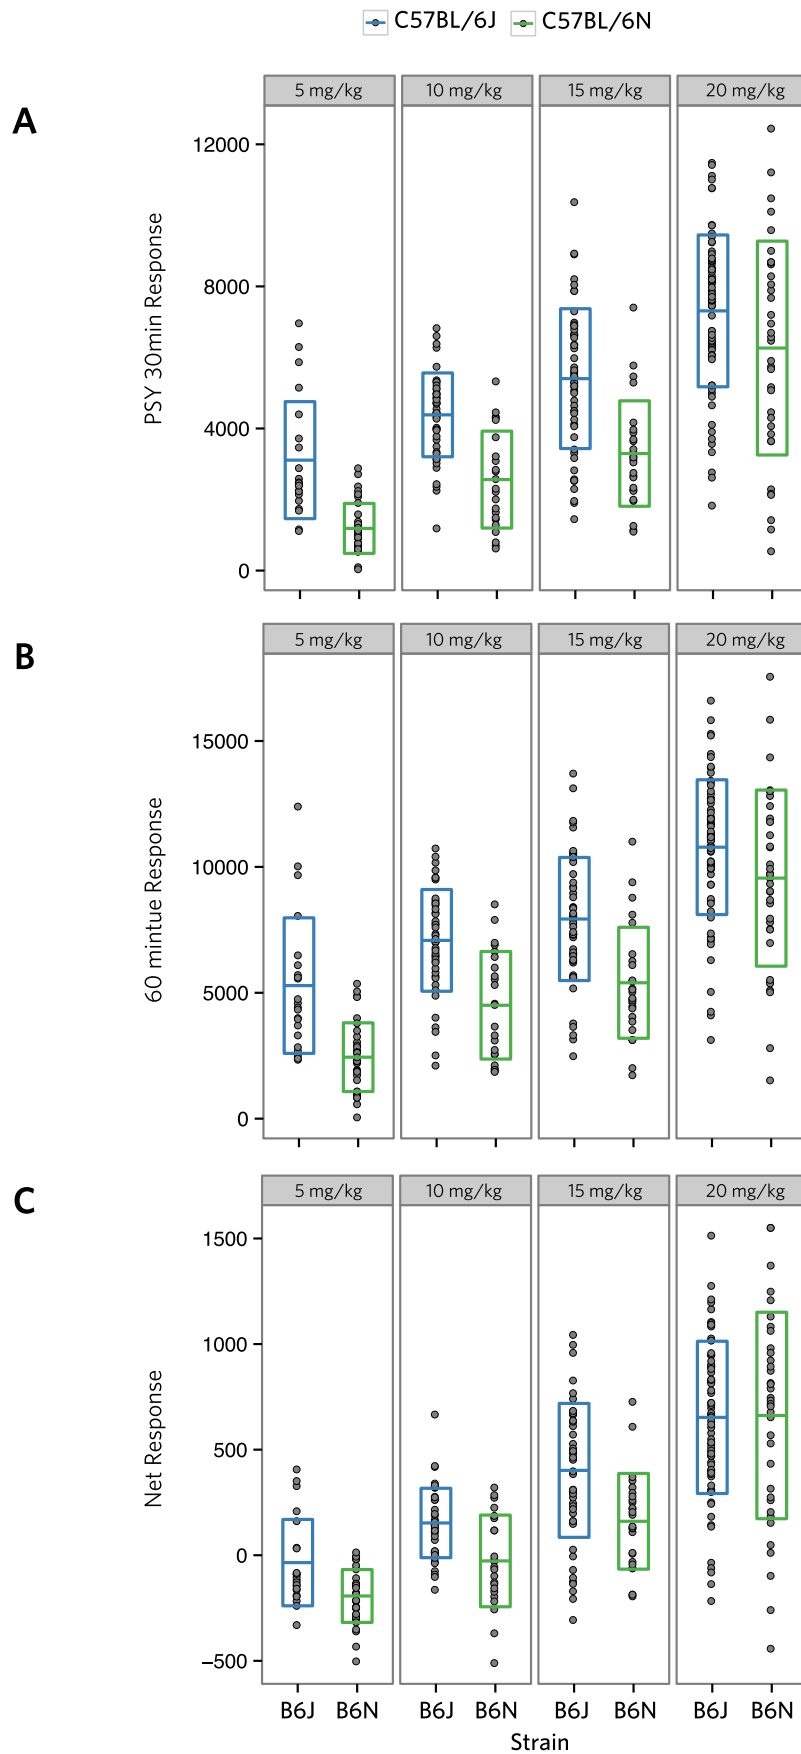

Fig S1: Cocaine response is lower in C57BL/6N (B6N) than in C57BL/6J (B6J) at multiple doses and measures. Thirty minute post injection response for 5, 10, 15, and 20mg/kg dose (A). Sixty minutes post injection response for 5, 10, 15, and 20 mg/kg dose (B). Net Response at 5, 10, 15 and 20 mg/kg (C). Boxes represent mean and 1SD range.

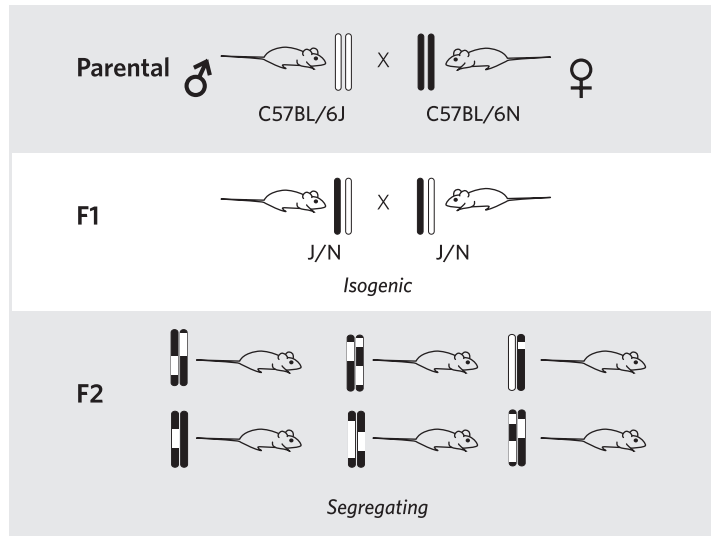

Fig S2: Breeding scheme of QTL cross to map the causative locus that regulates cocaine response difference between C57BL/6J and C57BL/6N. Male C57BL/6J and female C57BL/6N were crossed to produce F1s. The parental and F1 generations are isogenic and the F2 is segregating. The three generation cross generated 244 F2s that were genotyped and phenotyped. Animals from all three generations were phenotyped concurrently.

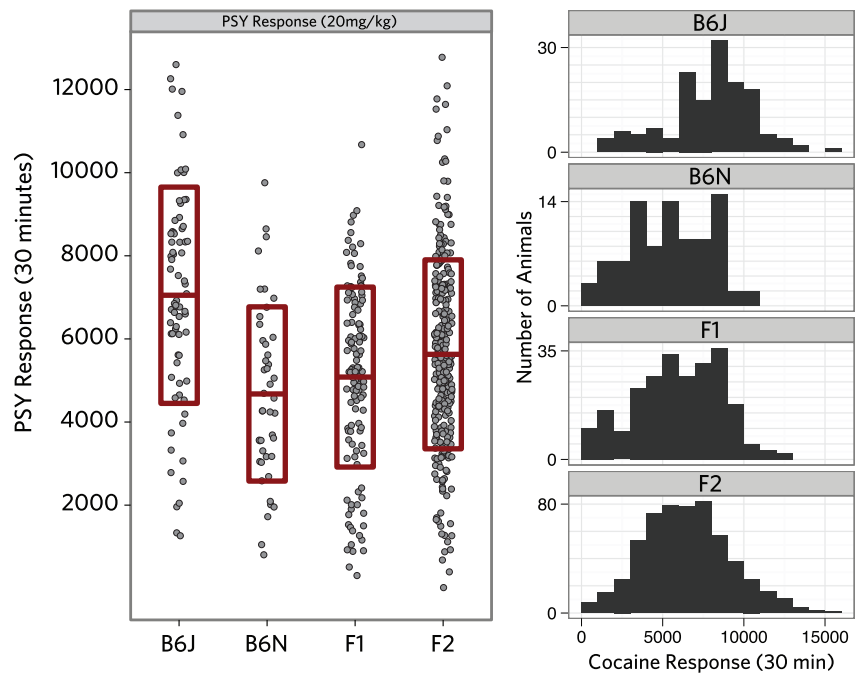

Fig S3: Thirty minute post injection response distribution of animals generated for QTL mapping.

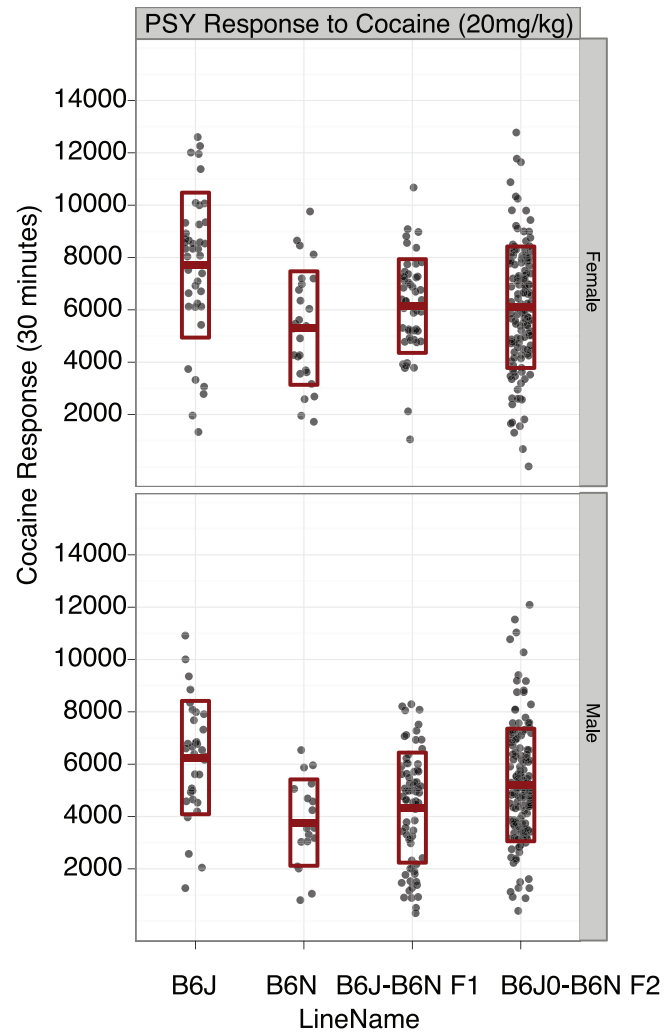

Fig S4: Phenotype distribution of animals generated for QTL mapping separated by sex.



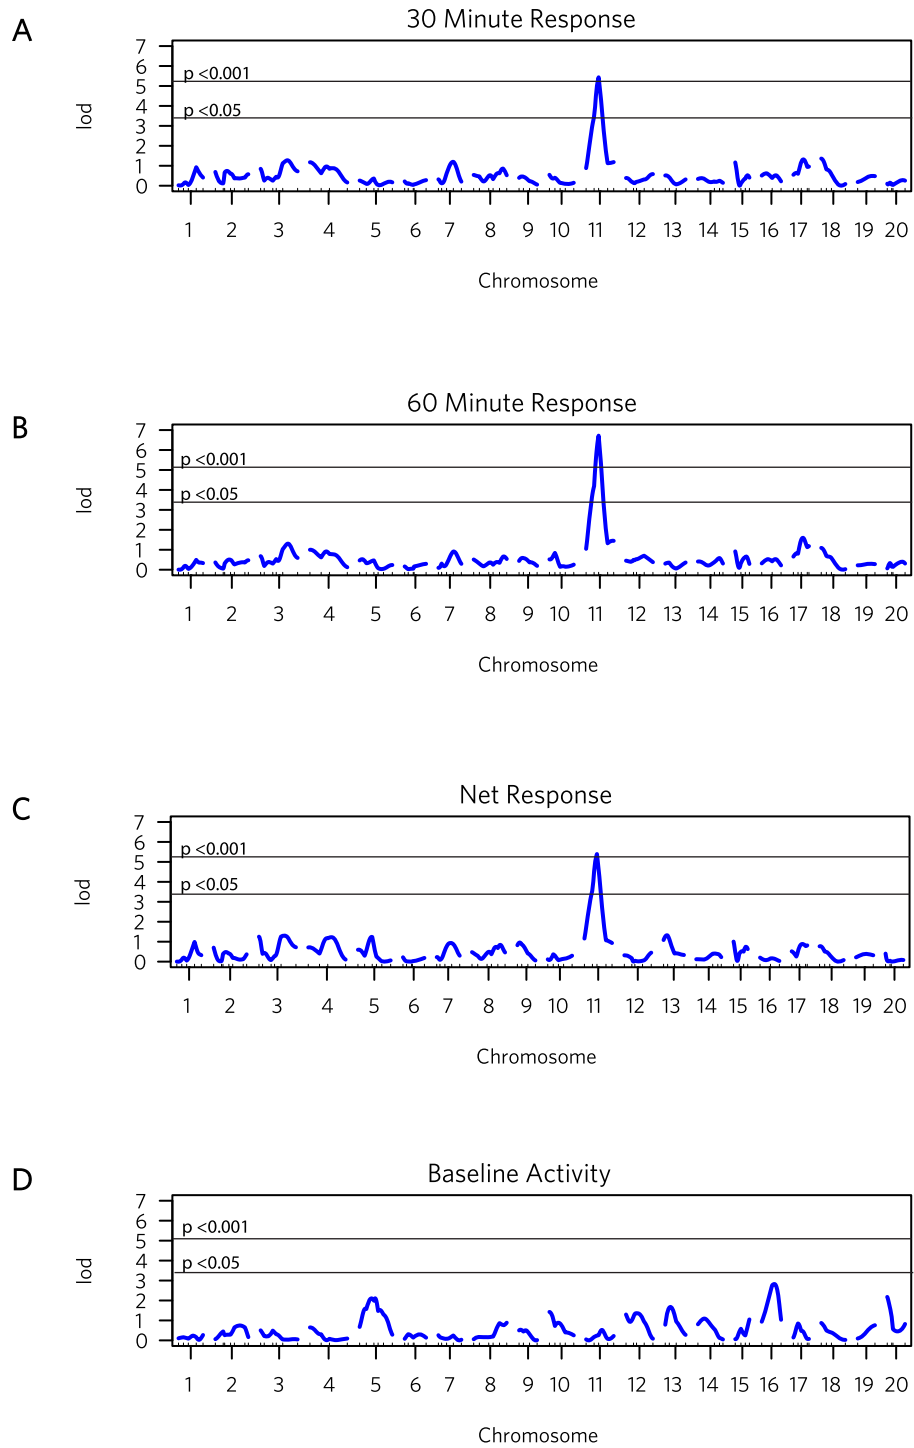

Fig S6: QTL scan of all measured phenotypes. 30 minute (A), 60 minute (B), net response (C), and baseline activity (D) are shown. The QTL on chromosome 11 is specific for cocaine response (A-C) and is not seen for baseline activity (D). All significance thresholds are based on 100,000 permutation tests.

$$h^2 = \frac{V_{Genetic}}{V_{Phenotype}} = \frac{\hat{\sigma}_{genetic}^2}{(\hat{\sigma}_{genetic}^2 + \hat{\sigma}_{environment}^2)}$$

$$\hat{\sigma}_{genetic}^2 + \hat{\sigma}_{environment}^2 = \hat{\sigma}_{F2}^2$$

$$\hat{\sigma}_{environment}^2 = \frac{\hat{\sigma}_{F1}^2 + \hat{\sigma}_{B6J}^2 + \hat{\sigma}_{B6N}^2}{3}$$

$$\hat{\sigma}_{genetic}^2 = \hat{\sigma}_{F2}^2 - \hat{\sigma}_{environment}^2$$

Fig S7: Heritability and percent of total phenotypic variance accounted for by the Chr 11 QTL. The total variance in the F2 population is due to genetic and environmental effects. Modeling of the *Cyfp2* locus using *fitqtl* command in RQTL indicates that this the Chr11 QTL explains 11% of the total variance (genetic and non-genetic). We estimated the variance (environment) using the F1 and parental B6J and B6N population data shown in Figure 2A. Using the formulas below, the heritability of the phenotype is 18.1% and the *Cyfp2* locus explains 11/18 or 61% of the phenotypic variance due to genetics. All evidence suggests that the *Cyfp2* locus is the major genetic contributor to the trait under our experimental conditions.



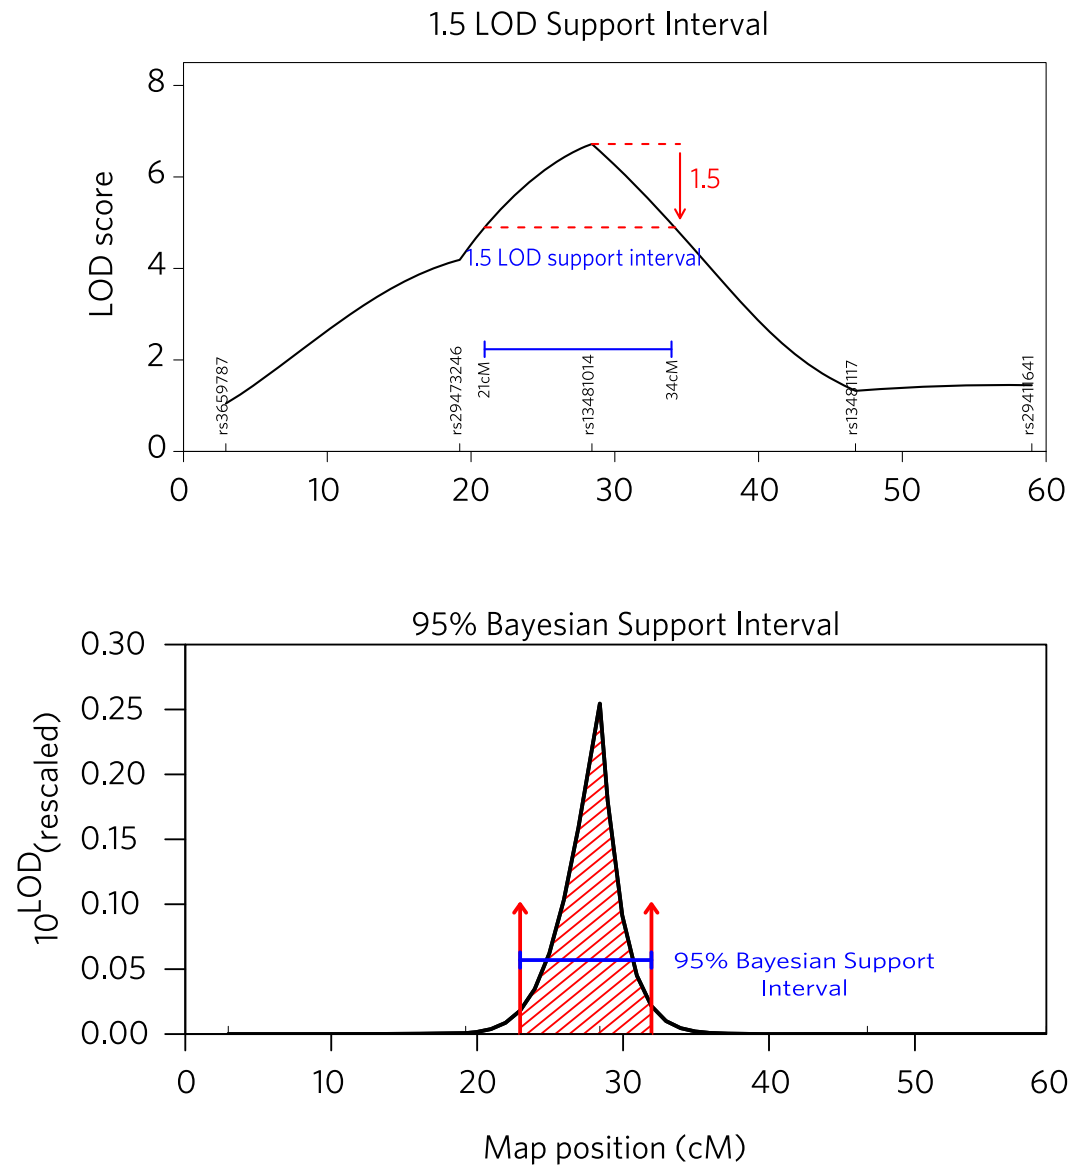

Fig S8: QTL support interval. The 1.5LOD drop support interval (top) and 95% Bayesian support interval (bottom). Since the 1.5LOD support interval is larger, we used this as the location of the QTL.

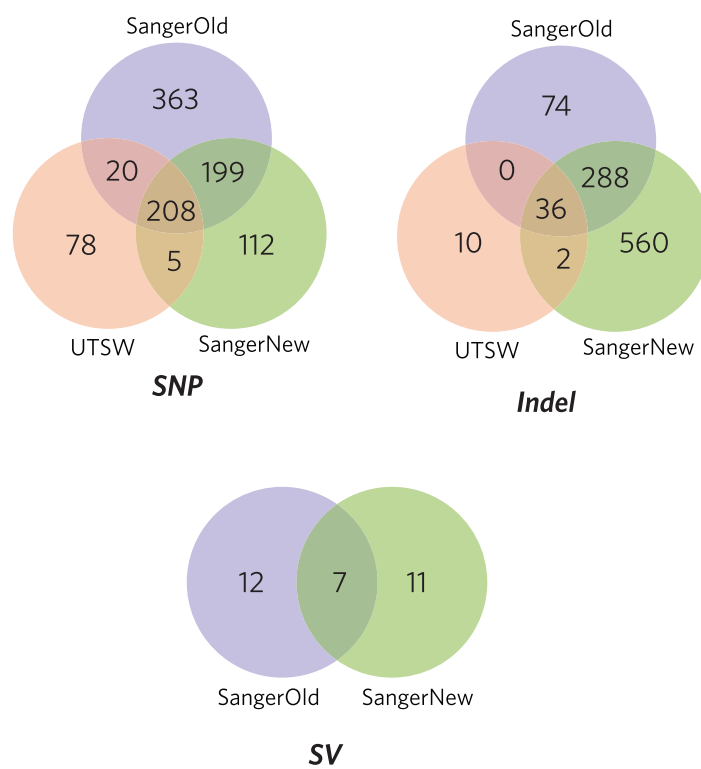

Fig S9: Venn Diagrams showing overlaps in variant discovered through next generation sequencing. We used three datasets for a 100X coverage of chromosome 11, Sanger Center 17 strain sequence that is published (SangerOld), Sanger Center new unpublished sequence of B6NJ (SangerNew), and our own data generated at University of Texas, Southwestern Medical Center (UTSW). We considered any variant that is seen in at least two of the three datasets for SNP and Indel. All structural variants were considered. The exact location of each variant is provided in Table 4.

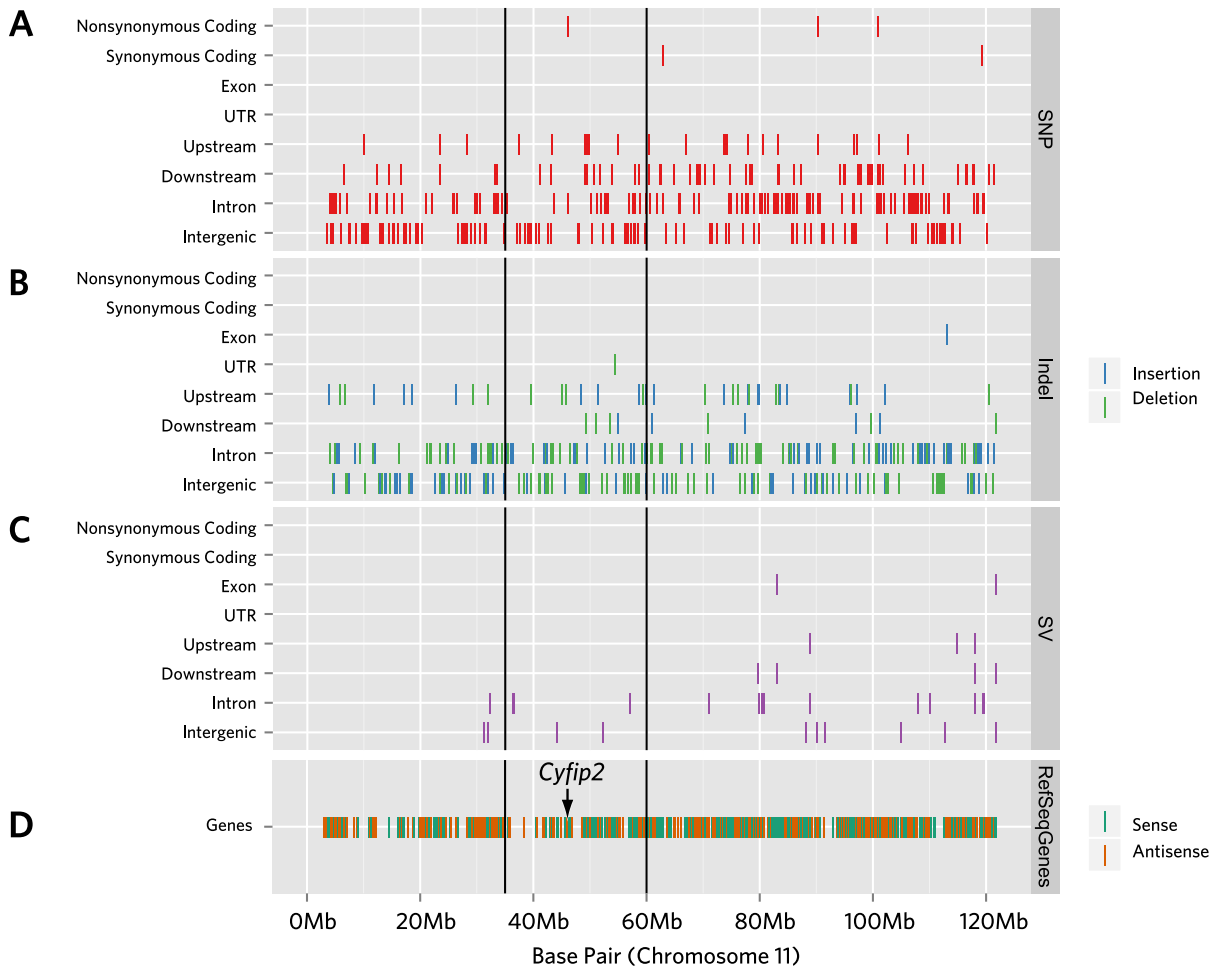

Fig S10: Next generation sequencing identifies a single nonsynonymous polymorphism in *Cyfp2*. C57BL/6N sequence data from three sources were combined to yield almost 100-fold coverage of chromosome 11. Classification of SNP (A), indels (B), and structural variants (C) from sequencing reveals only a single SNP (top row of A) in *CYFIP2* (D) that changes Serine 968 to phenylalanine in C57BL/6N. Entire Chromosome 11 is shown. The black lines represent QTL interval shown in Fig. 3.

# PolyPhen-2

## PolyPhen-2 report for Q5SQX6 S968F

### Query

| Protein Acc            | Position | AA <sub>1</sub> | AA <sub>2</sub> | Description                                                                  |
|------------------------|----------|-----------------|-----------------|------------------------------------------------------------------------------|
| <a href="#">Q5SQX6</a> | 968      | S               | F               | Cytoplasmic FMR1-interacting protein 2 OS=Mus musculus<br>GN=Cyfp2 PE=1 SV=2 |

### Results

Prediction/Confidence

PolyPhen-2 v2.2.2r395

HumDiv

This mutation is predicted to be **PROBABLY DAMAGING** with a score of 0.957  
(sensitivity: 0.78 ; specificity: 0.95)

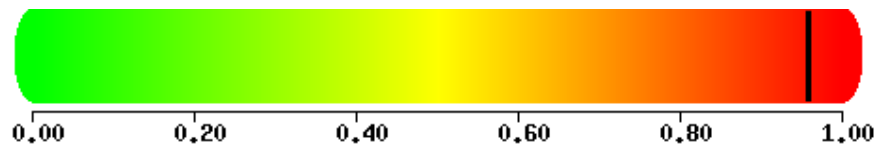

HumVar

### Details

| Multiple sequence alignment | UniProtKB/UniRef100                   | Release | 2011_12 (14-Dec-2011) |
|-----------------------------|---------------------------------------|---------|-----------------------|
| sp F6SLX2#1                 | VVKSL----LOGTILQYVKTLMEVMPKICRLPRHEYG | S       | PGILEFFHHOLKDIVEYAEK  |
| sp UPI00022578A6#1          | VVKSL----LOGTILQYVKTLMEVMPKICRLPRHEYG | S       | PGILEFFHHOLKDIVEYAEK  |
| sp F7E7A5#1                 | VVKSL----LOGTILQYVKTLMEVMPKICRLPRHEYG | S       | PGILEFFHHOLKDIVEYAEK  |
| sp UPI0001CE16D0#1          | VVKSL----LOGTILQYVKTLMEVMPKICRLPRHEYG | S       | PGILEFFHHOLKDIVEYAEK  |
| sp F1PDQ4#1                 | VVKSL----LOGTILQYVKTLMEVMPKICRLPRHEYG | S       | PGILEFFHHOLKDIVEYAEK  |
| sp Q7TMB8-2#1               | VVKSL----LOGTILQYVKTLMEVMPKICRLPRHEYG | S       | PGILEFFHHOLKDIVEYAEK  |
| sp D4A524#1                 | VVKSL----LOGTILQYVKTLMEVMPKICRLPRHEYG | S       | PGILEFFHHOLKDIVEYAEK  |
| sp UPI00022B37E2#1          | VVKSL----LOGTILQYVKTLMEVMPKICRLPRHEYG | S       | PGILEFFHHOLKDIVEYAEK  |
| sp UPI0001D6018E#1          | VVKSL----LOGTILQYVKTLMEVMPKICRLPRHEYG | S       | PGILEFFHHOLKDIVEYAEK  |
| sp UPI00022F5204#1          | VVKSL----LOGTILQYVKTLMEVMPKICRLPRHEYG | S       | PGILEFFHHOLKDIVEYAEK  |
| sp F7ATN4#1                 | VVKSL----LOGTILQYVKTLMEVMPKICRLPRHEYG | S       | PGILEFFHHOLKDIVEYAEK  |
| sp F7ATP3#1                 | VVKSL----LOGTILQYVKTLMEVMPKICRLPRHEYG | S       | PGILEFFHHOLKDIVEYAEK  |
| sp F7A5M9#1                 | ITLSF---NLOGTILQYVKTLMEVMPKICRLPRHEYG | S       | PGILEFFHHOLKDIVEYAEK  |
| sp G3QIA7#1                 | VVKSL----LOGTILQYVKTLMEVMPKICRLPRHEYG | S       | PGILEFFHHOLKDIVEYAEK  |
| sp G5AZH3#1                 | VVKSL----LOGTILQYVKTLMEVMPKICRLPRHEYG | S       | PGILEFFHHOLKDIVEYAEK  |
| sp UPI0001D55D95#1          | VVKSL----LOGTILQYVKTLMEVMPKICRLPRHEYG | S       | PGILEFFHHOLKDIVEYAEK  |
| sp F7ATM6#1                 | VVKSL----LOGTILQYVKTLMEVMPKICRLPRHEYG | S       | PGILEFFHHOLKDIVEYAEK  |

Figure S11

# *Cytip2* mRNA expression

data from Allen Brain Atlas

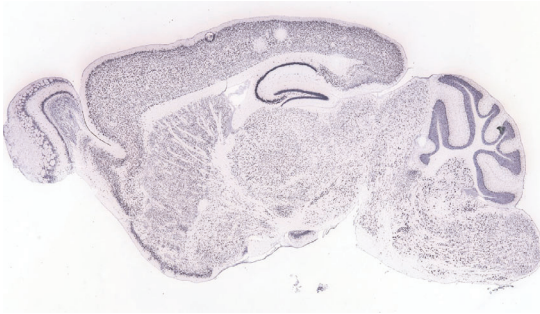

*Cytip2*

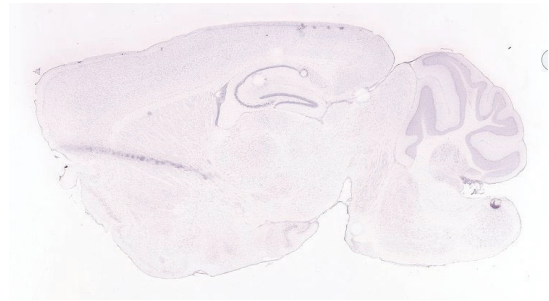

*Cytip1*

Image credit: Allen Institute for Brain Science

Fig S12: *In situ* expression data from the Allen Brain Atlas of adult mouse brain. *Cytip2* is broadly expressed throughout the brain whereas *Cytip1* is restricted to the hippocampus and cerebellum. *Cytip2* saggital-93 is shown. *Cytip1* saggital-91 is shown.

*Cytip1* - <http://mouse.brain-map.org/experiment/show/69014410>

*Cytip2* - <http://mouse.brain-map.org/experiment/show/68919922>

**A**

|                         |     |                      |                        |             |              |      |
|-------------------------|-----|----------------------|------------------------|-------------|--------------|------|
| Mouse CYFIP2            | 949 | KTLIEVMPKICRLPRHEYGS | PGILEFFHHQLKDIIEYAELKT | DVFQSLREVG  | 1000         |      |
| Human CYFIP2            | 974 | KTLIEVMPKICRLPRHEYGS | PGILEFFHHQLKDIIEYAELKT | DVFQSLREVG  | 1025         |      |
| Mouse CYFIP1            | 950 | KTLMEVMPKICRLPRHEYGS | PGILEFFHHQLKDIVEYAELKT | VCFQNLREVG  | 1001         |      |
| Human CYFIP1            | 950 | KTLMEVMPKICRLPRHEYGS | PGILEFFHHQLKDIVEYAELKT | VCFQNLREVG  | 1001         |      |
| Zebrafish CYFIP2        | 948 | KTLIEVMPKICRLPRHEYGS | PGILEFFHHQLKDIIEYAELKT | DVFQSLREVG  | 999          |      |
| Chicken CYFIP2          | 952 | KTLIEVMPKICRLPRHEYGS | PGILEFFHHQLKDIIEYAELKT | DVFQSLREVG  | 1003         |      |
| <i>Drosophila</i> CYFIP | 972 | KTLMIAMPKSCKLPRCEYGS | PGVLSYYQAHLTDIVQYPDAKT | ELFQSFREFFG | 1023         |      |
| <i>C. elegans</i> CYFIP | 953 | RNVFNMPKIVCKLPRSDYGS | NALLQYYVHHL            | EAVGKYP     | ELKSEFQDLREL | 1004 |

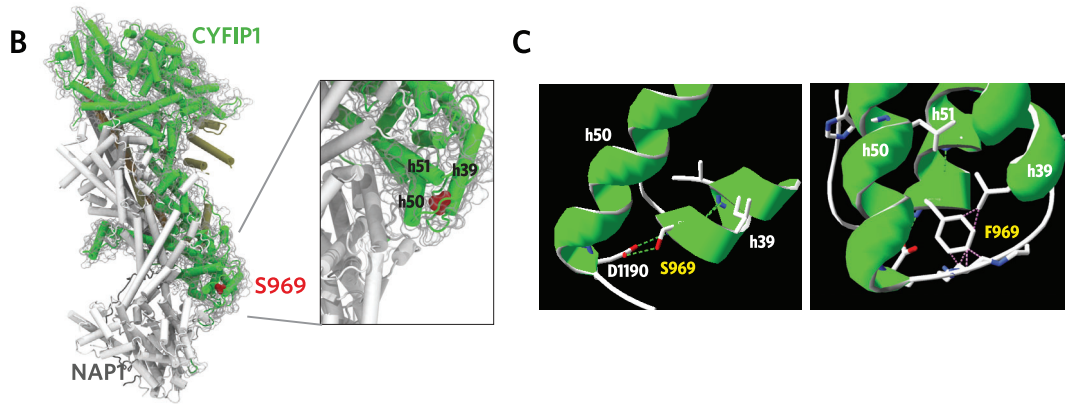

Fig S13: CYFIP2 S968F mutation occurs in a conserved residue and destabilizes the protein. (A) Serine 968 (red) of CYFIP2 is highly conserved in the CYFIP family. (B) S968 paralog in CYFIP1 (S969 red), shown using the WAVE complex crystal structure. CYFIP1 is shown in green with VDW surface rendering and NAP1 in white, and the inset shows helices 50, 51 and 39 that surround S968. (C) Molecular modeling to replace the S969 (left) with phenylalanine (right) leads to steric clashes with neighboring residues (pink).

## CYFIP1 S969F FoldX prediction

The empirical protein design forcefield FoldX is used to calculate the difference in free energy of the mutation:  $\Delta\Delta G$  (delta delta G). If the mutation destabilizes the structure,  $\Delta\Delta G$  is increased, whereas stabilizing mutations decrease the  $\Delta\Delta G$ . Since the FoldX error margin is around 0.5 kcal/mol, changes in this range are considered insignificant.

3p8c has 99.91 percent homology with the submitted sequence. Using FoldX, we build a homology model starting from this PDB. This pdb is then used to get some more information on the structural effect. The mutation from SER to PHE at position 969 results in a  $\Delta\Delta G$  of 17.37 kcal/mol. This implies that the mutation severely reduces the protein stability.

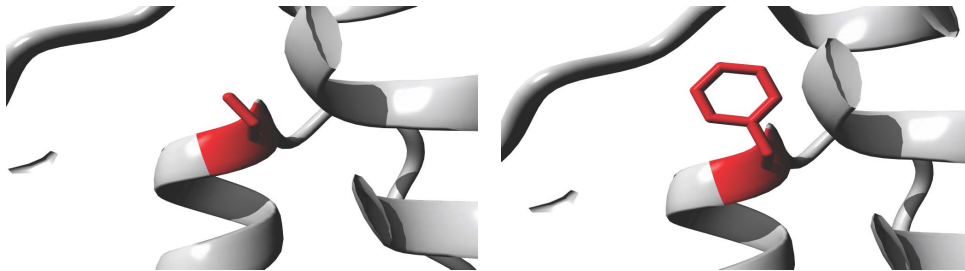

Molecular visualization of the WT (left) and variant (right) amino acid.  
The residues colored in red represents the wild type (SER) and variant residue (PHE).

## CYFIP2 S968F FoldX prediction

The empirical protein design forcefield FoldX is used to calculate the difference in free energy of the mutation:  $\Delta\Delta G$  (delta delta G). If the mutation destabilizes the structure,  $\Delta\Delta G$  is increased, whereas stabilizing mutations decrease the  $\Delta\Delta G$ . Since the FoldX error margin is around 0.5 kcal/mol, changes in this range are considered insignificant.

3p8c has 88.51 percent homology with the submitted sequence. Using FoldX, we build a homology model starting from this PDB. This pdb is then used to get some more information on the structural effect. The mutation from SER to PHE at position 969 results in a  $\Delta\Delta G$  of 11.56 kcal/mol. This implies that the mutation severely reduces the protein stability.

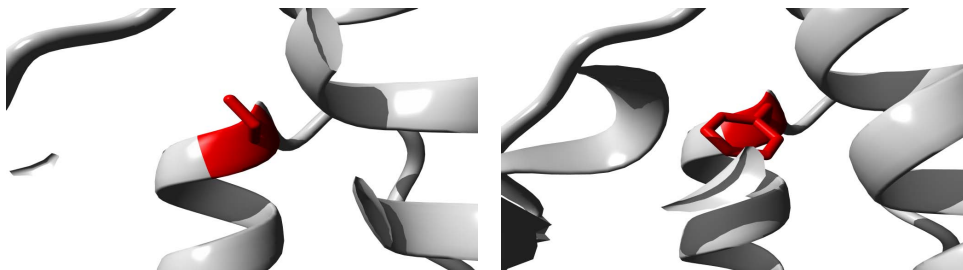

Molecular visualization of the WT (left) and variant (right) amino acid.  
The residues colored in red represents the wild type (SER) and variant residue (PHE).

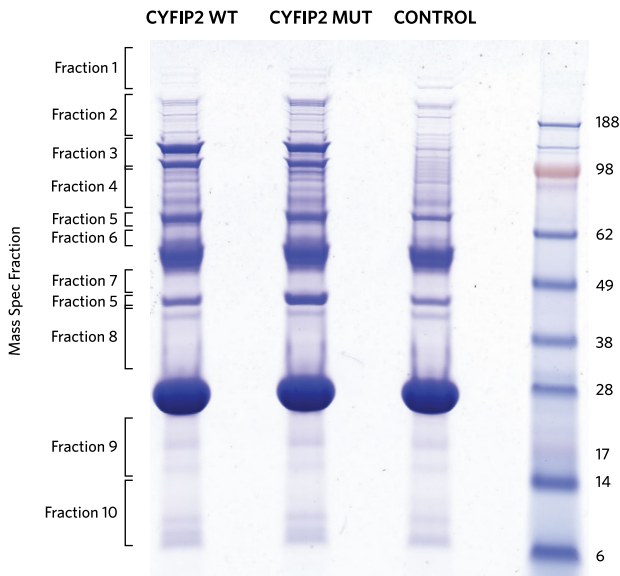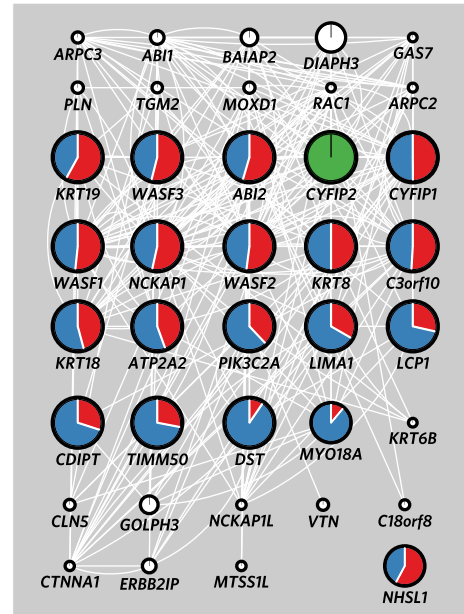

Fig S15: Proteomics analysis of the CYFIP2 interactome. HEK293 cell lines expressing either the WT (B6J) , mutant (B6N) or neither (Control) CYFIP2 were used for immunoprecipitation with anti FLAG antibody. The complex was separated on SDS-PAGE gel which was cut into 10 fractions. Each fraction was subjected to mass spectrometry analysis (left). The enriched proteins that specifically bound to CYFIP2 WT or mutant were analyzed using Genemania network analysis(right). The circles are known interactors of CYFIP, with the size of the circle representing the relative confidence of interaction. The colors represent the enrichment in WT (Blue) or mutant (Red) CYFIP2 (Green). For instance CYFIP1 equally interacts with WT and mutant CYFIP2, but MYO18A is enriched more in WT than mutant pulldown. Analysis was carried out in Cytoscape using the Genemania plugin.



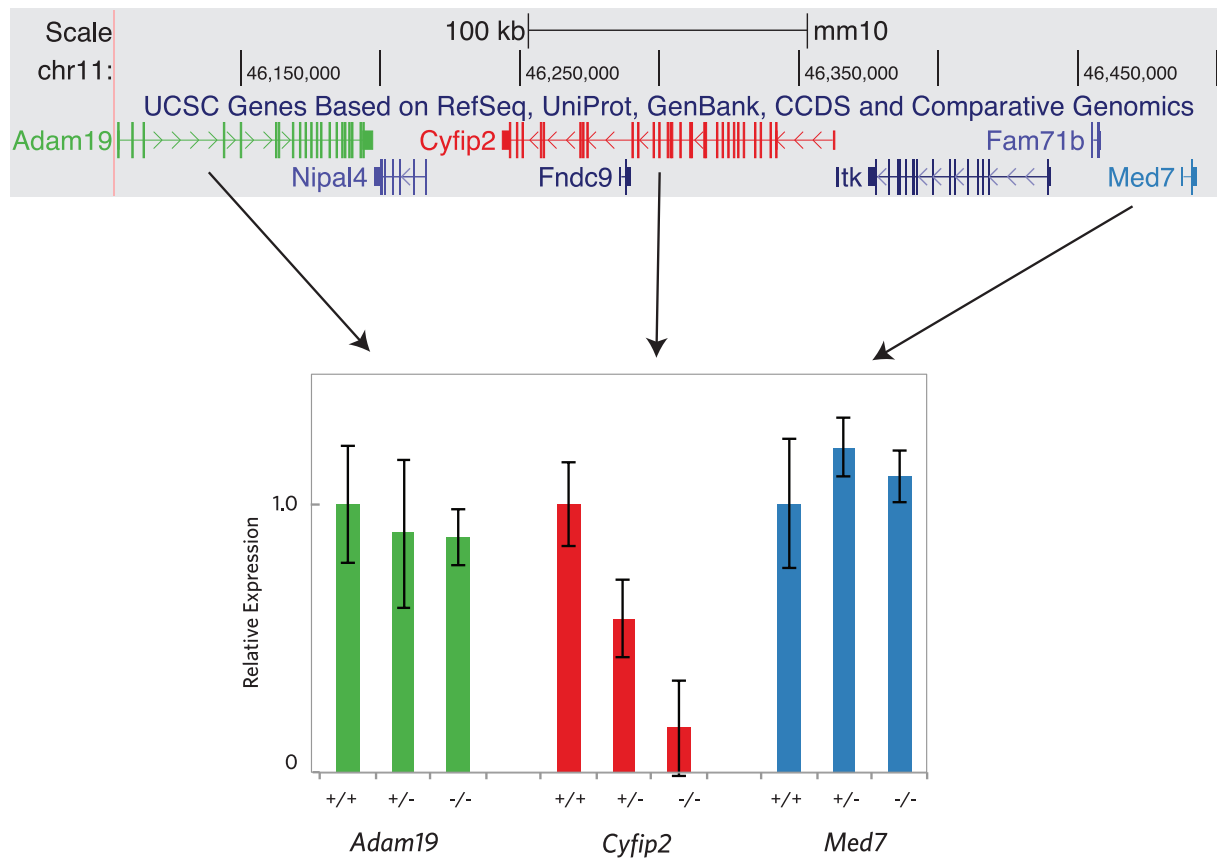

Fig S16: Quantitative rtPCR confirms lack of *Cyfip2* transcript in the knockout mice. Whole brain RNA was isolated from embryos (E18 and E21). Two animals of each genotype were used in this assay. As control expression levels of neighboring genes were also quantitated. Taqman probes for *Med7* (Mm00502970), *Adam19* (Mm00477337), *Cyfip2* (Mm00460148), *GAPDH* (Mm99999915) were obtained from Life Technologies.

## Cocaine Metabolism

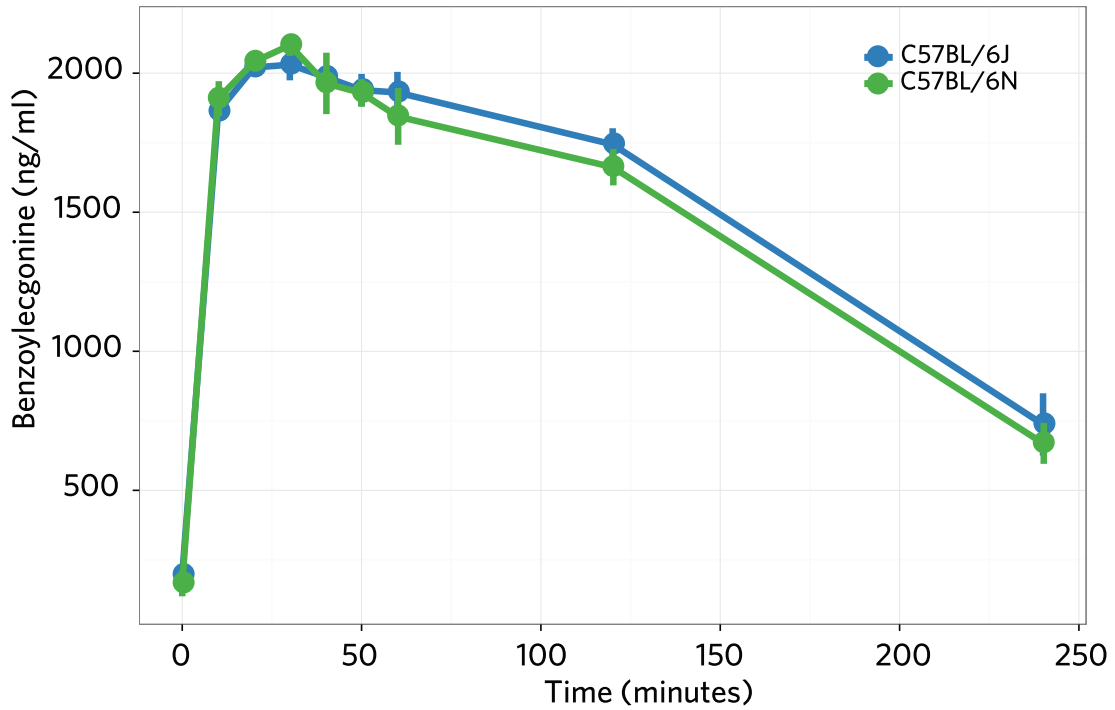

Fig S17: The rate of cocaine metabolism is identical in C57BL/6J and C57BL/6N. Cocaine metabolism was monitored by quantifying the production of benzoylecgonine after drug administration. Mice were intraperitoneally injected with Cocaine (20mg/kg) and blood was harvested by bleeding of the submandibular vein with Goldenrod Animal Lancet (Medipoint Inc) at the indicated times. Two mice were used from each strain for each time point. Serum was used to quantitate benzoylecgonine using an ELISA kit (catalog number KA0929, Abnova).

**Table S1. Polymorphic Markers used in QTL mapping**

| <b>ID</b>   | <b>chr</b> | <b>cM</b> | <b>bp</b>   | <b>Class</b> |
|-------------|------------|-----------|-------------|--------------|
| rs31362610  | 1          | 20.60     | 42,424,440  | SNP          |
| rs13475886  | 1          | 30.64     | 61,228,463  | SNP          |
| rs32481241  | 1          | 40.55     | 78,483,338  | SNP          |
| rs6327099   | 1          | 56.61     | 131,282,938 | SNP          |
| rs6341208   | 1          | 70.42     | 165,062,830 | SNP          |
| rs13476348  | 2          | 8.42      | 11,092,478  | SNP          |
| rs33064547  | 2          | 24.42     | 38,802,132  | SNP          |
| rs33488914  | 2          | 27.33     | 44,998,528  | SNP          |
| rs13476554  | 2          | 39.32     | 67,080,320  | SNP          |
| rs33162749  | 2          | 47.11     | 78,639,333  | SNP          |
| rs13476801  | 2          | 68.38     | 138,305,756 | SNP          |
| rs29818510  | 2          | 75.41     | 152,936,750 | SNP          |
| rs13476956  | 3          | 1.96      | 5,370,727   | SNP          |
| rs13477019  | 3          | 9.25      | 23,723,842  | SNP          |
| rs30557586  | 3          | 26.64     | 55,568,652  | SNP          |
| rs31154737  | 3          | 33.61     | 73,922,455  | SNP          |
| rs31321678  | 3          | 46.83     | 107,273,295 | SNP          |
| rs31594267  | 3          | 77.06     | 151,882,540 | SNP          |
| rs13477622  | 4          | 11.78     | 28,249,560  | SNP          |
| rs13477746  | 4          | 34.61     | 65,605,269  | SNP          |
| rs3680956   | 4          | 51.37     | 109,547,100 | SNP          |
| rs6397070   | 4          | 87.66     | 155,284,926 | SNP          |
| rs33367397  | 5          | 8.37      | 18,216,206  | SNP          |
| rs33508711  | 5          | 22.00     | 41,153,028  | SNP          |
| rs13478320  | 5          | 37.42     | 71,133,300  | SNP          |
| rs33249065  | 5          | 45.91     | 92,510,104  | SNP          |
| rs3662161   | 5          | 56.88     | 117,909,356 | SNP          |
| rs13478542  | 5          | 74.86     | 135,358,216 | SNP          |
| rs30032909  | 6          | 11.65     | 25,337,386  | SNP          |
| rs30314218  | 6          | 18.83     | 40,029,337  | SNP          |
| rs13478783  | 6          | 29.10     | 60,541,373  | SNP          |
| rs6157367   | 6          | 30.80     | 67,237,174  | SNP          |
| rs13478995  | 6          | 55.16     | 117,420,898 | SNP          |
| rs31221380  | 7          | 24.48     | 38,216,957  | SNP          |
| rs13479233  | 7          | 31.01     | 55,071,694  | SNP          |
| rs32060039  | 7          | 41.08     | 78,961,795  | SNP          |
| 7-110121823 | 7          | 54.85     | 110,121,823 | SNP          |
| rs13479522  | 7          | 71.15     | 136,179,208 | SNP          |
| rs13479605  | 8          | 4.97      | 10,521,755  | SNP          |
| rs13479672  | 8          | 16.56     | 30,207,547  | SNP          |

|             |    |       |             |     |
|-------------|----|-------|-------------|-----|
| rs32729089  | 8  | 35.56 | 77,477,256  | SNP |
| rs33601490  | 8  | 44.39 | 94,031,516  | SNP |
| rs33219858  | 8  | 57.42 | 112,622,271 | SNP |
| rs32577205  | 8  | 72.10 | 126,154,896 | SNP |
| rs13480100  | 9  | 7.80  | 21,254,586  | SNP |
| rs13480122  | 9  | 16.67 | 30,964,211  | SNP |
| rs29644859  | 9  | 29.12 | 52,593,224  | SNP |
| rs29934845  | 9  | 44.50 | 81,281,343  | SNP |
| rs29332012  | 10 | 7.55  | 17,969,433  | SNP |
| rs13480575  | 10 | 18.70 | 33,372,829  | SNP |
| rs13480619  | 10 | 29.24 | 57,472,268  | SNP |
| rs13459122  | 10 | 39.72 | 80,258,110  | SNP |
| rs13480759  | 10 | 57.01 | 108,815,683 | SNP |
| rs3659787   | 11 | 2.94  | 4,408,733   | SNP |
| rs29473246  | 11 | 19.21 | 33,448,367  | SNP |
| rs13481014  | 11 | 28.41 | 47,930,884  | SNP |
| rs13481117  | 11 | 46.74 | 79,065,732  | SNP |
| rs29411641  | 11 | 59.01 | 94,820,571  | SNP |
| rs29158719  | 12 | 2.80  | 5,967,934   | SNP |
| rs13481403  | 12 | 18.06 | 40,215,580  | SNP |
| rs6385807   | 12 | 24.14 | 56,859,360  | SNP |
| rs13481569  | 12 | 39.76 | 86,986,287  | SNP |
| rs13481634  | 12 | 57.49 | 108,071,865 | SNP |
| rs13481734  | 13 | 12.24 | 27,129,019  | SNP |
| rs3722313   | 13 | 20.49 | 41,538,155  | SNP |
| 13-66355394 | 13 | 34.52 | 66,355,394  | SNP |
| rs3702296   | 13 | 53.59 | 101,979,187 | SNP |
| rs31187642  | 14 | 5.80  | 10,769,899  | SNP |
| rs30264676  | 14 | 39.28 | 74,815,528  | SNP |
| rs31059846  | 14 | 49.62 | 100,024,215 | SNP |
| rs31273189  | 14 | 56.62 | 109,059,068 | SNP |
| rs13459145  | 15 | 3.48  | 7,117,980   | SNP |
| rs31810918  | 15 | 14.99 | 37,392,168  | SNP |
| rs3702158   | 15 | 23.86 | 56,992,041  | SNP |
| rs31858887  | 15 | 32.24 | 71,462,981  | SNP |
| rs4165065   | 16 | 10.79 | 17,412,172  | SNP |
| rs4186435   | 16 | 31.96 | 51,172,069  | SNP |
| rs4214728   | 16 | 50.08 | 87,819,874  | SNP |
| rs4137196   | 17 | 3.10  | 5,332,903   | SNP |
| rs29512740  | 17 | 12.53 | 25,523,395  | SNP |
| rs33334258  | 17 | 19.16 | 39,307,300  | SNP |
| rs13483055  | 17 | 31.31 | 60,459,368  | SNP |
| rs13483071  | 17 | 34.71 | 65,343,195  | SNP |

|            |    |       |             |     |
|------------|----|-------|-------------|-----|
| rs13483221 | 18 | 8.58  | 15,408,257  | SNP |
| rs13483296 | 18 | 18.94 | 35,366,160  | SNP |
| rs13483369 | 18 | 29.22 | 54,774,495  | SNP |
| rs29690544 | 18 | 57.53 | 84,686,237  | SNP |
| rs30709918 | 19 | 11.68 | 16,676,708  | SNP |
| rs30608930 | 19 | 46.76 | 52,433,860  | SNP |
| rs6368704  | 20 | 32.29 | 55,120,804  | SNP |
| rs6275359  | 20 | 41.30 | 90,945,246  | SNP |
| rs31259892 | 20 | 43.84 | 98,418,215  | SNP |
| rs31266096 | 20 | 68.46 | 147,904,667 | SNP |

**Table S2. Polymorphic Markers between current C57BL/6J and DNA from 1984 stock of C57BL/6J**

| <b>chromosome</b> | <b>position</b> | <b>rsid</b> |
|-------------------|-----------------|-------------|
| 17                | 39,307,300      | rs33334258  |
| 2                 | 78,639,333      | rs33162749  |
| 6                 | 40,029,337      | rs30314218  |
| 10                | 17,969,433      | rs29332012  |
| 1                 | 78,483,338      | rs32481241  |
| 12                | 5,967,934       | rs29158719  |
| 19                | 16,676,708      | rs30709918  |
| 15                | 37,392,168      | rs31810918  |
| 20                | 98,418,215      | rs31259892  |
| 11                | 33,448,367      | rs29473246  |
| 6                 | 25,337,386      | rs30032909  |
| 2                 | 11,092,478      | rs13476348  |
| 2                 | 67,080,320      | rs13476554  |
| 3                 | 23,723,842      | rs13477019  |
| 6                 | 30,872,499      | rs13478690  |
| 8                 | 119,637,332     | rs13480010  |
| 12                | 40,215,580      | rs13481403  |
| 12                | 56,859,360      | rs6385807   |
| 12                | 108,071,865     | rs13481634  |
| 15                | 7,117,980       | rs13459145  |
| 16                | 51,172,069      | rs4186435   |
| 18                | 54,774,495      | rs13483369  |
| 19                | 52,433,860      | rs30608930  |

Table S3: Next generation sequencing coverage statistics

| Column1   | Target            | total_coverage | average_coverage | C57BL_total_cvg | C57BL_mean_cvg | C57BL_granular_Q1 | C57BL_granular_median | C57BL_granular_Q3 | C57BL_%_above_15 |
|-----------|-------------------|----------------|------------------|-----------------|----------------|-------------------|-----------------------|-------------------|------------------|
| SangerOld | 11:1-121843856    | 3,678,350,283  | 30.98            | 3,678,350,283   | 30.98          | 24                | 31                    | 38                | 93               |
| SangerNew | 11:1-121843856    | 6,310,333,098  | 53.14            | 6,310,333,098   | 53.14          | 46                | 54                    | 61                | 99.2             |
| UTSW      | chr11:1-121843856 | 1,847,499,298  | 15.56            | 1,847,499,298   | 15.56          | 12                | 17                    | 21                | 57               |
| Summary   |                   | 11,836,182,679 | 99.68            | 11,836,182,679  | 99.68          |                   |                       |                   |                  |

Table S4. Classification of all variants on chromosome 11 between C57BL/6N and C57BL/6J. There are three sections that contain SNPs, indels and structural variants.

| SNP variants |          |           |        |             |            |         |          |          |                    |           |                      |         |           |            |
|--------------|----------|-----------|--------|-------------|------------|---------|----------|----------|--------------------|-----------|----------------------|---------|-----------|------------|
| Chromosome   | Position | Reference | Change | Change_type | Homozygous | Quality | Coverage | Warnings | Gene_ID            | Gene_name | Bio_type             | Exon_ID | Exon_Rank | Effect     |
| 11           | 3487233  | C         | A      | SNP         | Hom        |         | 411      | 14 NA    |                    |           |                      |         | NA        | INTERGENIC |
| 11           | 3936845  | C         | T      | SNP         | Hom        | 153.13  |          | 9 NA     | ENSMUSG00000019368 | Sec14I4   | protein_coding       |         | NA        | INTRON     |
| 11           | 4148231  | C         | A      | SNP         | Hom        | 226.03  |          | 9 NA     |                    |           |                      |         | NA        | INTERGENIC |
| 11           | 4408733  | C         | A      | SNP         | Hom        | 394     |          | 11 NA    | ENSMUSG00000034354 | Mtmr3     | protein_coding       |         | NA        | INTRON     |
| 11           | 4595965  | C         | A      | SNP         | Hom        | 191.13  |          | 8 NA     |                    |           |                      |         | NA        | INTERGENIC |
| 11           | 4676225  | A         | G      | SNP         | Hom        | 272.03  |          | 9 NA     | ENSMUSG00000009073 | Nf2       | protein_coding       |         | NA        | INTRON     |
| 11           | 5125634  | A         | C      | SNP         | Hom        | 362     |          | 14 NA    | ENSMUSG00000020393 | Kremen1   | protein_coding       |         | NA        | INTRON     |
| 11           | 5837251  | G         | T      | SNP         | Hom        | 569     |          | 22 NA    | ENSMUSG00000041798 | Gck       | protein_coding       |         | NA        | INTRON     |
| 11           | 5984921  | A         | G      | SNP         | Hom        | 329.01  |          | 9 NA     |                    |           |                      |         | NA        | INTERGENIC |
| 11           | 6404420  | T         | C      | SNP         | Hom        | 587     |          | 16 NA    | ENSMUSG00000020437 | Myo1g     | protein_coding       |         | NA        | DOWNSTREAM |
| 11           | 7019754  | G         | T      | SNP         | Hom        | 238.13  |          | 8 NA     | ENSMUSG00000020431 | Adcy1     | protein_coding       |         | NA        | INTRON     |
| 11           | 7030169  | G         | A      | SNP         | Hom        | 574     |          | 15 NA    | ENSMUSG00000020431 | Adcy1     | protein_coding       |         | NA        | INTRON     |
| 11           | 7338077  | T         | C      | SNP         | Hom        | 468     |          | 15 NA    |                    |           |                      |         | NA        | INTERGENIC |
| 11           | 7386861  | C         | A      | SNP         | Hom        | 454     |          | 20 NA    |                    |           |                      |         | NA        | INTERGENIC |
| 11           | 7456145  | A         | C      | SNP         | Hom        | 289.03  |          | 10 NA    |                    |           |                      |         | NA        | INTERGENIC |
| 11           | 8655605  | C         | T      | SNP         | Hom        | 59.97   |          | 16 NA    |                    |           |                      |         | NA        | INTERGENIC |
| 11           | 9626981  | T         | C      | SNP         | Hom        | 518     |          | 15 NA    |                    |           |                      |         | NA        | INTERGENIC |
| 11           | 9728793  | T         | A      | SNP         | Hom        | 237.06  |          | 8 NA     |                    |           |                      |         | NA        | INTERGENIC |
| 11           | 9734998  | G         | T      | SNP         | Hom        | 263.06  |          | 8 NA     |                    |           |                      |         | NA        | INTERGENIC |
| 11           | 10022561 | C         | T      | SNP         | Hom        | 315.01  |          | 27 NA    |                    |           |                      |         | NA        | INTERGENIC |
| 11           | 10097494 | C         | T      | SNP         | Hom        | 37.76   |          | 18 NA    | ENSMUSG00000084091 | Gm11995   | pseudogene           |         | NA        | UPSTREAM   |
| 11           | 10335959 | T         | C      | SNP         | Hom        | 298     |          | 17 NA    |                    |           |                      |         | NA        | INTERGENIC |
| 11           | 10729450 | T         | G      | SNP         | Hom        | 394     |          | 13 NA    |                    |           |                      |         | NA        | INTERGENIC |
| 11           | 11018623 | A         | C      | SNP         | Hom        | 315     |          | 16 NA    | ENSMUSG00000050830 | Vwc2      | protein_coding       |         | NA        | INTRON     |
| 11           | 12153006 | A         | T      | SNP         | Hom        | 548     |          | 16 NA    | ENSMUSG00000020173 | Cobl      | protein_coding       |         | NA        | INTRON     |
| 11           | 12163894 | G         | T      | SNP         | Hom        | 689     |          | 20 NA    | ENSMUSG00000020173 | Cobl      | protein_coding       |         | NA        | INTRON     |
| 11           | 12241453 | C         | A      | SNP         | Hom        | 157.26  |          | 7 NA     | ENSMUSG00000086584 | Gm12002   | processed_transcript |         | NA        | DOWNSTREAM |
| 11           | 12331253 | G         | A      | SNP         | Hom        | 176.13  |          | 8 NA     | ENSMUSG00000020173 | Cobl      | protein_coding       |         | NA        | INTRON     |
| 11           | 12934353 | A         | G      | SNP         | Hom        | 285.03  |          | 9 NA     |                    |           |                      |         | NA        | INTERGENIC |
| 11           | 12944508 | A         | G      | SNP         | Hom        | 206.13  |          | 9 NA     |                    |           |                      |         | NA        | INTERGENIC |
| 11           | 13413099 | T         | C      | SNP         | Hom        | 666     |          | 21 NA    |                    |           |                      |         | NA        | INTERGENIC |
| 11           | 14072930 | G         | T      | SNP         | Hom        | 98.51   |          | 5 NA     | ENSMUSG00000085452 | 4930554G2 | processed_transcript |         | NA        | INTRON     |
| 11           | 14392914 | T         | C      | SNP         | Hom        | 526     |          | 14 NA    | ENSMUSG00000080734 | Gm12006   | pseudogene           |         | NA        | DOWNSTREAM |
| 11           | 14512346 | A         | T      | SNP         | Hom        | 407     |          | 33 NA    |                    |           |                      |         | NA        | INTERGENIC |
| 11           | 14512404 | C         | T      | SNP         | Hom        | 220.13  |          | 6 NA     |                    |           |                      |         | NA        | INTERGENIC |
| 11           | 15065667 | C         | T      | SNP         | Hom        | 667     |          | 20 NA    |                    |           |                      |         | NA        | INTERGENIC |
| 11           | 15276479 | A         | C      | SNP         | Hom        | 77.97   |          | 6 NA     |                    |           |                      |         | NA        | INTERGENIC |
| 11           | 15386631 | A         | G      | SNP         | Hom        | 486.01  |          | 51 NA    | ENSMUSG00000083292 | Gm12010   | pseudogene           |         | NA        | INTRON     |
| 11           | 15977997 | C         | A      | SNP         | Hom        | 332     |          | 10 NA    |                    |           |                      |         | NA        | INTERGENIC |
| 11           | 16628346 | T         | C      | SNP         | Hom        | 1147    |          | 34 NA    | ENSMUSG00000064831 | U6.145    | snRNA                |         | NA        | DOWNSTREAM |
| 11           | 16703877 | G         | A      | SNP         | Hom        | 419     |          | 12 NA    | ENSMUSG00000020122 | Egfr      | protein_coding       |         | NA        | INTRON     |
| 11           | 17142200 | T         | A      | SNP         | Hom        | 253.03  |          | 12 NA    |                    |           |                      |         | NA        | INTERGENIC |
| 11           | 17277912 | C         | T      | SNP         | Hom        | 559     |          | 17 NA    |                    |           |                      |         | NA        | INTERGENIC |
| 11           | 17420444 | T         | A      | SNP         | Hom        | 326     |          | 13 NA    |                    |           |                      |         | NA        | INTERGENIC |
| 11           | 17499495 | A         | G      | SNP         | Hom        | 425     |          | 12 NA    |                    |           |                      |         | NA        | INTERGENIC |
| 11           | 18214202 | G         | A      | SNP         | Hom        | 596     |          | 18 NA    |                    |           |                      |         | NA        | INTERGENIC |
| 11           | 19183398 | T         | C      | SNP         | Hom        | 80.97   |          | 7 NA     |                    |           |                      |         | NA        | INTERGENIC |
| 11           | 19632927 | G         | C      | SNP         | Hom        | 601.01  |          | 20 NA    |                    |           |                      |         | NA        | INTERGENIC |
| 11           | 20357467 | C         | T      | SNP         | Hom        | 408     |          | 13 NA    |                    |           |                      |         | NA        | INTERGENIC |
| 11           | 21040136 | A         | G      | SNP         | Hom        | 425     |          | 11 NA    | ENSMUSG00000020134 | Peli1     | protein_coding       |         | NA        | INTRON     |
| 11           | 21982867 | T         | A      | SNP         | Hom        | 539     |          | 16 NA    | ENSMUSG00000042302 | Ehbp1     | protein_coding       |         | NA        | INTRON     |
| 11           | 23527127 | C         | A      | SNP         | Hom        | 412     |          | 12 NA    | ENSMUSG00000042208 | 0610010F0 | protein_coding       |         | NA        | DOWNSTREAM |
| 11           | 23538532 | G         | A      | SNP         | Hom        | 99.51   |          | 7 NA     | ENSMUSG00000042208 | 0610010F0 | protein_coding       |         | NA        | UPSTREAM   |
| 11           | 25757134 | A         | A      | SNP         | Hom        | 358     |          | 13 NA    | ENSMUSG00000032985 | 5730522E0 | protein_coding       |         | NA        | INTRON     |
| 11           | 25910068 | T         | C      | SNP         | Hom        | 788     |          | 22 NA    | ENSMUSG00000032985 | 5730522E0 | protein_coding       |         | NA        | INTRON     |
| 11           | 26453484 | C         | A      | SNP         | Hom        | 136.51  |          | 6 NA     | ENSMUSG00000064090 | Vrk2      | protein_coding       |         | NA        | INTRON     |
| 11           | 26657109 | C         | T      | SNP         | Hom        | 203.06  |          | 12 NA    |                    |           |                      |         | NA        | INTERGENIC |
| 11           | 26705708 | G         | A      | SNP         | Hom        | 47.76   |          | 9 NA     |                    |           |                      |         | NA        | INTERGENIC |
| 11           | 27433378 | G         | T      | SNP         | Hom        | 225.54  |          | 9 NA     |                    |           |                      |         | NA        | INTERGENIC |
| 11           | 27535012 | C         | A      | SNP         | Hom        | 571     |          | 28 NA    |                    |           |                      |         | NA        | INTERGENIC |
| 11           | 27662333 | G         | T      | SNP         | Hom        | 278.01  |          | 16 NA    |                    |           |                      |         | NA        | INTERGENIC |
| 11           | 28108412 | C         | T      | SNP         | Hom        | 291.03  |          | 10 NA    |                    |           |                      |         | NA        | INTERGENIC |
| 11           | 28232032 | G         | C      | SNP         | Hom        | 240.03  |          | 18 NA    |                    |           |                      |         | NA        | INTERGENIC |
| 11           | 28239853 | C         | T      | SNP         | Hom        | 466     |          | 27 NA    | ENSMUSG00000032889 | Gm6685    | protein_coding       |         | NA        | UPSTREAM   |
| 11           | 28932065 | A         | G      | SNP         | Hom        | 466     |          | 20 NA    |                    |           |                      |         | NA        | INTERGENIC |
| 11           | 29003036 | A         | C      | SNP         | Hom        | 375     |          | 12 NA    |                    |           |                      |         | NA        | INTERGENIC |
| 11           | 29572869 | C         | A      | SNP         | Hom        | 295     |          | 17 NA    |                    |           |                      |         | NA        | INTERGENIC |
| 11           | 29679482 | T         | A      | SNP         | Hom        | 250.06  |          | 8 NA     | ENSMUSG00000044072 | Eml6      | protein_coding       |         | NA        | INTRON     |
| 11           | 30055673 | T         | A      | SNP         | Hom        | 428.13  |          | 17 NA    | ENSMUSG00000020315 | Snpb2     | protein_coding       |         | NA        | INTRON     |
| 11           | 30452213 | T         | C      | SNP         | Hom        | 730     |          | 19 NA    | ENSMUSG00000060923 | Acyp2     | protein_coding       |         | NA        | INTRON     |
| 11           | 30568835 | C         | A      | SNP         | Hom        | 235.54  |          | 8 NA     |                    |           |                      |         | NA        | INTERGENIC |
| 11           | 30575691 | A         | C      | SNP         | Hom        | 343     |          | 13 NA    |                    |           |                      |         | NA        | INTERGENIC |
| 11           | 31482524 | T         | G      | SNP         | Hom        | 497.51  |          | 15 NA    |                    |           |                      |         | NA        | INTERGENIC |
| 11           | 31677676 | A         | G      | SNP         | Hom        | 347.01  |          | 9 NA     |                    |           |                      |         | NA        | INTERGENIC |
| 11           | 32973589 | G         | A      | SNP         | Hom        | 359.97  |          | 17 NA    | ENSMUSG00000087318 | Gm12114   | processed_transcript |         | NA        | INTRON     |
| 11           | 32973593 | G         | A      | SNP         | Hom        | 424     |          | 17 NA    | ENSMUSG00000087318 | Gm12114   | processed_transcript |         | NA        | INTRON     |
| 11           | 32973597 | G         | A      | SNP         | Hom        | 389.51  |          | 17 NA    | ENSMUSG00000087318 | Gm12114   | processed_transcript |         | NA        | INTRON     |
| 11           | 33123249 | G         | A      | SNP         | Hom        | 541     |          | 17 NA    | ENSMUSG00000087501 | Gm12116   | lincRNA              |         | NA        | DOWNSTREAM |
| 11           | 33254090 | T         | G      | SNP         | Hom        | 386     |          | 19 NA    | ENSMUSG00000040594 | Ranbp17   | protein_coding       |         | NA        | INTRON     |
| 11           | 33448367 | A         | G      | SNP         | Hom        | 602     |          | 16 NA    | ENSMUSG00000020159 | Gabpr     | protein_coding       |         | NA        | DOWNSTREAM |
| 11           | 33595529 | A         | C      | SNP         | Hom        | 492     |          | 16 NA    | ENSMUSG00000053519 | Kcnp1     | protein_coding       |         | NA        | INTRON     |
| 11           | 33663208 | A         | G      | SNP         | Hom        | 428     |          | 14 NA    | ENSMUSG00000053519 | Kcnp1     | protein_coding       |         | NA        | INTRON     |
| 11           | 34442982 | C         | A      | SNP         | Hom        | 238.06  |          | 10 NA    | ENSMUSG00000020143 | Dock2     | protein_coding       |         | NA        | INTRON     |
| 11           | 34443000 | C         | T      | SNP         | Hom        | 316     |          | 11 NA    | ENSMUSG00000020143 | Dock2     | protein_coding       |         | NA        | INTRON     |
| 11           | 34443006 | C         | A      | SNP         | Hom        | 294.01  |          | 12 NA    | ENSMUSG00000020143 | Dock2     | protein_coding       |         | NA        | INTRON     |
| 11           | 34443020 | C         | A      | SNP         | Hom        | 383     |          | 13 NA    | ENSMUSG00000020143 | Dock2     | protein_coding       |         | NA        | INTRON     |
| 11           | 34443030 | C         | A      | SNP         | Hom        | 234.06  |          | 7 NA     | ENSMUSG00000020143 | Dock2     | protein_coding       |         | NA        | INTRON     |
| 11           | 34443081 | C         | G      | SNP         | Hom        | 470     |          | 16 NA    | ENSMUSG00000020143 | Dock2     | protein_coding       |         | NA        | INTRON     |
| 11           | 34443092 | C         | A      | SNP         | Hom        | 431     |          | 16 NA    | ENSMUSG00000020143 | Dock2     | protein_coding       |         | NA        | INTRON     |
| 11           | 34443104 | C         | G      | SNP         | Hom        | 488     |          | 17 NA    | ENSMUSG00000020143 | Dock2     | protein_coding       |         | NA        | INTRON     |
| 11           | 34443125 | C         | A      | SNP         | Hom        | 45.76   |          | 5 NA     | ENSMUSG00000020143 | Dock2     | protein_coding       |         | NA        | INTRON     |



|    |          |   |   |     |     |         |     |    |                    |             |                      |             |              |
|----|----------|---|---|-----|-----|---------|-----|----|--------------------|-------------|----------------------|-------------|--------------|
| 11 | 34443235 | C | A | SNP | Hom | 67.97   | 6   | NA | ENSMUSG00000020143 | Dock2       | protein_coding       | NA          | INTRON       |
| 11 | 34443245 | C | A | SNP | Hom | 434     | 16  | NA | ENSMUSG00000020143 | Dock2       | protein_coding       | NA          | INTRON       |
| 11 | 34443270 | C | A | SNP | Hom | 326     | 12  | NA | ENSMUSG00000020143 | Dock2       | protein_coding       | NA          | INTRON       |
| 11 | 34443294 | C | A | SNP | Hom | 300.01  | 11  | NA | ENSMUSG00000020143 | Dock2       | protein_coding       | NA          | INTRON       |
| 11 | 34443322 | C | G | SNP | Hom | 337     | 11  | NA | ENSMUSG00000020143 | Dock2       | protein_coding       | NA          | INTRON       |
| 11 | 34443342 | C | A | SNP | Hom | 453     | 16  | NA | ENSMUSG00000020143 | Dock2       | protein_coding       | NA          | INTRON       |
| 11 | 34443345 | C | G | SNP | Hom | 477     | 16  | NA | ENSMUSG00000020143 | Dock2       | protein_coding       | NA          | INTRON       |
| 11 | 34443908 | A | T | SNP | Hom | 420     | 13  | NA | ENSMUSG00000020143 | Dock2       | protein_coding       | NA          | INTRON       |
| 11 | 34443909 | A | G | SNP | Hom | 336.03  | 13  | NA | ENSMUSG00000020143 | Dock2       | protein_coding       | NA          | INTRON       |
| 11 | 34443910 | A | G | SNP | Hom | 409     | 14  | NA | ENSMUSG00000020143 | Dock2       | protein_coding       | NA          | INTRON       |
| 11 | 34495164 | T | A | SNP | Hom | 1371    | 44  | NA | ENSMUSG00000020143 | Dock2       | protein_coding       | NA          | INTRON       |
| 11 | 34495166 | C | A | SNP | Hom | 1390    | 46  | NA | ENSMUSG00000020143 | Dock2       | protein_coding       | NA          | INTRON       |
| 11 | 34780294 | G | T | SNP | Hom | 347     | 17  | NA |                    |             |                      | NA          | INTERGENIC   |
| 11 | 35234632 | A | G | SNP | Hom | 427     | 11  | NA | ENSMUSG00000056427 | Slit3       | protein_coding       | NA          | INTRON       |
| 11 | 37115943 | G | A | SNP | Hom | 387     | 14  | NA |                    |             |                      | NA          | INTERGENIC   |
| 11 | 37116114 | T | G | SNP | Hom | 308.01  | 9   | NA |                    |             |                      | NA          | INTERGENIC   |
| 11 | 37468487 | C | T | SNP | Hom | 79.97   | 5   | NA | ENSMUSG00000087388 | Gm12128     | processed_transcript | NA          | UPSTREAM     |
| 11 | 37561095 | G | A | SNP | Hom | 448     | 13  | NA |                    |             |                      | NA          | INTERGENIC   |
| 11 | 38401072 | T | C | SNP | Hom | 589     | 17  | NA |                    |             |                      | NA          | INTERGENIC   |
| 11 | 38401120 | T | G | SNP | Hom | 547     | 15  | NA |                    |             |                      | NA          | INTERGENIC   |
| 11 | 38494133 | T | G | SNP | Hom | 461     | 12  | NA |                    |             |                      | NA          | INTERGENIC   |
| 11 | 38964770 | A | C | SNP | Hom | 204.13  | 8   | NA |                    |             |                      | NA          | INTERGENIC   |
| 11 | 39222314 | G | A | SNP | Hom | 718     | 19  | NA |                    |             |                      | NA          | INTERGENIC   |
| 11 | 39598862 | T | C | SNP | Hom | 301.01  | 9   | NA |                    |             |                      | NA          | INTERGENIC   |
| 11 | 40411018 | G | A | SNP | Hom | 371     | 10  | NA |                    |             |                      | NA          | INTERGENIC   |
| 11 | 41025615 | T | G | SNP | Hom | 494     | 13  | NA |                    |             |                      | NA          | INTERGENIC   |
| 11 | 41192910 | T | C | SNP | Hom | 234.03  | 11  | NA | ENSMUSG00000081112 | Gm12140     | pseudogene           | NA          | DOWNSTREAM   |
| 11 | 42611956 | C | A | SNP | Hom | 179.13  | 6   | NA |                    |             |                      | NA          | INTERGENIC   |
| 11 | 42612003 | A | G | SNP | Hom | 239.01  | 29  | NA |                    |             |                      | NA          | INTERGENIC   |
| 11 | 42612009 | A | G | SNP | Hom | 191.06  | 31  | NA |                    |             |                      | NA          | INTERGENIC   |
| 11 | 42612056 | G | A | SNP | Hom | 800     | 44  | NA |                    |             |                      | NA          | INTERGENIC   |
| 11 | 43076671 | T | C | SNP | Hom | 358     | 12  | NA | ENSMUSG00000055415 | Atp10b      | protein_coding       | NA          | DOWNSTREAM   |
| 11 | 43171964 | A | G | SNP | Hom | 475     | 13  | NA |                    |             |                      | NA          | INTERGENIC   |
| 11 | 43340333 | G | T | SNP | Hom | 376     | 15  | NA | ENSMUSG00000044707 | Ccnj1       | protein_coding       | NA          | UPSTREAM     |
| 11 | 43654559 | T | C | SNP | Hom | 294.01  | 13  | NA | ENSMUSG00000050541 | Adra1b      | protein_coding       | NA          | INTRON       |
| 11 | 46036117 | T | A | SNP | Hom | 219.06  | 8   | NA | ENSMUSG00000020340 | Cyfp2       | protein_coding       | exon_11_46f | 26 NS_CODING |
| 11 | 46084671 | G | C | SNP | Hom | 266.01  | 10  | NA | ENSMUSG00000020340 | Cyfp2       | protein_coding       | NA          | INTRON       |
| 11 | 47930884 | T | C | SNP | Hom | 329.01  | 11  | NA |                    |             |                      | NA          | INTERGENIC   |
| 11 | 48065799 | T | C | SNP | Hom | 508     | 14  | NA |                    |             |                      | NA          | INTERGENIC   |
| 11 | 49015265 | G | C | SNP | Hom | 385.19  | 25  | NA | ENSMUSG00000046311 | Zfp62       | protein_coding       | NA          | UPSTREAM     |
| 11 | 49110483 | T | C | SNP | Hom | 206.13  | 12  | NA | ENSMUSG00000050959 | Olfr1392    | protein_coding       | NA          | DOWNSTREAM   |
| 11 | 49408579 | T | C | SNP | Hom | 437.04  | 17  | NA | ENSMUSG00000081791 | Gm12190     | pseudogene           | NA          | DOWNSTREAM   |
| 11 | 49475509 | G | A | SNP | Hom | 609     | 36  | NA | ENSMUSG00000064057 | Scgb3a1     | protein_coding       | NA          | UPSTREAM     |
| 11 | 49475518 | G | A | SNP | Hom | 422     | 35  | NA | ENSMUSG00000064057 | Scgb3a1     | protein_coding       | NA          | UPSTREAM     |
| 11 | 49530193 | C | A | SNP | Hom | 315     | 15  | NA | ENSMUSG00000020362 | Cnot6       | protein_coding       | NA          | UPSTREAM     |
| 11 | 49838455 | T | G | SNP | Hom | 741     | 27  | NA | ENSMUSG00000020376 | Rnf130      | protein_coding       | NA          | UPSTREAM     |
| 11 | 50232547 | C | A | SNP | Hom | 650     | 22  | NA | ENSMUSG00000020375 | Rufy1       | protein_coding       | NA          | INTRON       |
| 11 | 50314369 | A | G | SNP | Hom | 325.01  | 11  | NA |                    |             |                      | NA          | INTERGENIC   |
| 11 | 50776124 | A | G | SNP | Hom | 597     | 20  | NA | ENSMUSG00000083542 | Olfr1379-ps | pseudogene           | NA          | DOWNSTREAM   |
| 11 | 51150239 | C | T | SNP | Hom | 438     | 13  | NA | ENSMUSG00000063564 | Col23a1     | protein_coding       | NA          | INTRON       |
| 11 | 51835312 | G | T | SNP | Hom | 31.77   | 5   | NA | ENSMUSG00000020389 | Cdk13       | protein_coding       | NA          | DOWNSTREAM   |
| 11 | 51878742 | T | C | SNP | Hom | 260.03  | 10  | NA | ENSMUSG00000087101 | Gm16953     | lincRNA              | NA          | INTRON       |
| 11 | 52247258 | C | A | SNP | Hom | 193.13  | 10  | NA |                    |             |                      | NA          | INTERGENIC   |
| 11 | 52263223 | G | T | SNP | Hom | 571     | 22  | NA |                    |             |                      | NA          | INTERGENIC   |
| 11 | 52725097 | G | A | SNP | Hom | 565     | 16  | NA | ENSMUSG00000036264 | Fstl4       | protein_coding       | NA          | INTRON       |
| 11 | 52831098 | A | G | SNP | Hom | 236.06  | 7   | NA | ENSMUSG00000036264 | Fstl4       | protein_coding       | NA          | INTRON       |
| 11 | 52831203 | A | G | SNP | Hom | 916     | 25  | NA | ENSMUSG00000036264 | Fstl4       | protein_coding       | NA          | INTRON       |
| 11 | 52831257 | T | G | SNP | Hom | 202.13  | 6   | NA | ENSMUSG00000036264 | Fstl4       | protein_coding       | NA          | INTRON       |
| 11 | 52834380 | A | G | SNP | Hom | 439     | 15  | NA | ENSMUSG00000036264 | Fstl4       | protein_coding       | NA          | INTRON       |
| 11 | 53109728 | A | G | SNP | Hom | 574     | 18  | NA | ENSMUSG00000020361 | Hspa4       | protein_coding       | NA          | INTRON       |
| 11 | 53793075 | T | C | SNP | Hom | 667     | 33  | NA | ENSMUSG00000020334 | Slc22a4     | protein_coding       | NA          | DOWNSTREAM   |
| 11 | 53850694 | C | T | SNP | Hom | 241.06  | 8   | NA |                    |             |                      | NA          | INTERGENIC   |
| 11 | 53954080 | G | A | SNP | Hom | 7219.01 | 250 | NA |                    |             |                      | NA          | INTERGENIC   |
| 11 | 53954118 | A | T | SNP | Hom | 7052.01 | 250 | NA |                    |             |                      | NA          | INTERGENIC   |
| 11 | 53954121 | C | T | SNP | Hom | 7293.01 | 250 | NA |                    |             |                      | NA          | INTERGENIC   |
| 11 | 54048103 | T | C | SNP | Hom | 508     | 14  | NA |                    |             |                      | NA          | INTERGENIC   |
| 11 | 54909259 | C | A | SNP | Hom | 176.13  | 8   | NA | ENSMUSG00000000594 | Gm2a        | protein_coding       | NA          | UPSTREAM     |
| 11 | 56184043 | G | T | SNP | Hom | 451     | 16  | NA |                    |             |                      | NA          | INTERGENIC   |
| 11 | 56446472 | G | C | SNP | Hom | 1013    | 50  | NA |                    |             |                      | NA          | INTERGENIC   |
| 11 | 56467321 | A | G | SNP | Hom | 1153    | 31  | NA |                    |             |                      | NA          | INTERGENIC   |
| 11 | 56704748 | C | T | SNP | Hom | 132.51  | 6   | NA |                    |             |                      | NA          | INTERGENIC   |
| 11 | 56881782 | A | G | SNP | Hom | 496     | 15  | NA | ENSMUSG00000020524 | Gria1       | protein_coding       | NA          | INTRON       |
| 11 | 57150478 | G | A | SNP | Hom | 132.26  | 5   | NA |                    |             |                      | NA          | INTERGENIC   |
| 11 | 57611712 | C | A | SNP | Hom | 496.21  | 22  | NA | ENSMUSG00000087165 | 2010001A1   | lincRNA              | NA          | INTRON       |
| 11 | 57621311 | A | T | SNP | Hom | 173.26  | 6   | NA | ENSMUSG00000020519 | Sap30l      | protein_coding       | NA          | INTRON       |
| 11 | 57739193 | G | T | SNP | Hom | 779     | 28  | NA |                    |             |                      | NA          | INTERGENIC   |
| 11 | 57845997 | G | A | SNP | Hom | 423     | 11  | NA | ENSMUSG00000037331 | Larp1       | protein_coding       | NA          | INTRON       |
| 11 | 57893450 | G | T | SNP | Hom | 495     | 18  | NA |                    |             |                      | NA          | INTERGENIC   |
| 11 | 57994103 | G | T | SNP | Hom | 160.26  | 6   | NA | ENSMUSG00000020514 | Mrpl22      | protein_coding       | NA          | DOWNSTREAM   |
| 11 | 58000175 | G | T | SNP | Hom | 320.01  | 14  | NA | ENSMUSG00000082292 | Gm12250     | pseudogene           | NA          | INTRON       |
| 11 | 58508180 | A | G | SNP | Hom | 220.13  | 6   | NA |                    |             |                      | NA          | INTERGENIC   |
| 11 | 58595831 | T | A | SNP | Hom | 510     | 15  | NA | ENSMUSG00000056959 | Olfr315     | protein_coding       | NA          | DOWNSTREAM   |
| 11 | 58595832 | G | C | SNP | Hom | 481     | 14  | NA | ENSMUSG00000056959 | Olfr315     | protein_coding       | NA          | DOWNSTREAM   |
| 11 | 58912550 | T | C | SNP | Hom | 266.03  | 12  | NA | ENSMUSG00000061462 | Obscn       | protein_coding       | NA          | INTRON       |
| 11 | 59727055 | C | T | SNP | Hom | 241.06  | 9   | NA |                    |             |                      | NA          | INTERGENIC   |
| 11 | 59975491 | C | T | SNP | Hom | 164.26  | 7   | NA | ENSMUSG00000062115 | Rai1        | protein_coding       | NA          | INTRON       |
| 11 | 60471403 | C | A | SNP | Hom | 217.06  | 34  | NA | ENSMUSG00000084335 | Gm12619     | pseudogene           | NA          | UPSTREAM     |
| 11 | 60490168 | G | C | SNP | Hom | 35.77   | 28  | NA | ENSMUSG00000082748 | Gm12616     | pseudogene           | NA          | DOWNSTREAM   |
| 11 | 60669079 | A | T | SNP | Hom | 432     | 13  | NA | ENSMUSG00000042569 | Dhrs7b      | protein_coding       | NA          | INTRON       |
| 11 | 61902241 | C | T | SNP | Hom | 248.12  | 14  | NA | ENSMUSG00000042331 | Specc1      | protein_coding       | NA          | INTRON       |
| 11 | 62335824 | T | G | SNP | Hom | 585     | 15  | NA | ENSMUSG00000018509 | Cenpv       | protein_coding       | NA          | DOWNSTREAM   |
| 11 | 62559152 | T | C | SNP | Hom | 350     | 12  | NA | ENSMUSG00000084020 | Gm12282     | pseudogene           | NA          | DOWNSTREAM   |
| 11 | 62814700 | G | C | SNP | Hom | 714     | 27  | NA | ENSMUSG00000087604 | 4930452L0   | processed_transcript | NA          | INTRON       |
| 11 | 62881422 | A | G | SNP | Hom | 506     | 14  | NA | ENSMUSG00000042189 | Tekt3       | protein_coding       | NA          | INTRON       |
| 11 | 62886983 | T | C | SNP | Hom | 433     | 12  | NA | ENSMUSG00000042189 | Tekt3       | protein_coding       | exon_11_62f | 3 SYN_CODING |

|    |          |   |   |     |     |        |     |    |                    |             |                      |             |              |
|----|----------|---|---|-----|-----|--------|-----|----|--------------------|-------------|----------------------|-------------|--------------|
| 11 | 63445159 | T | C | SNP | Hom | 525    | 37  | NA |                    |             |                      | NA          | INTERGENIC   |
| 11 | 64808045 | T | C | SNP | Hom | 541    | 14  | NA | ENSMUSG00000020549 | Elac2       | protein_coding       | NA          | DOWNSTREAM   |
| 11 | 65237281 | A | G | SNP | Hom | 454    | 14  | NA |                    |             |                      | NA          | INTERGENIC   |
| 11 | 65765558 | G | T | SNP | Hom | 273.01 | 23  | NA | ENSMUSG00000056752 | Dnahc9      | protein_coding       | NA          | INTRON       |
| 11 | 65886145 | A | C | SNP | Hom | 461    | 13  | NA | ENSMUSG00000056752 | Dnahc9      | protein_coding       | NA          | INTRON       |
| 11 | 66667847 | T | C | SNP | Hom | 439.41 | 16  | NA |                    |             |                      | NA          | INTERGENIC   |
| 11 | 66937684 | G | T | SNP | Hom | 523    | 15  | NA | ENSMUSG00000087410 | 2310065F0   | processed_transcript | NA          | UPSTREAM     |
| 11 | 67741335 | T | A | SNP | Hom | 1239   | 33  | NA | ENSMUSG00000055134 | 9130017K1   | lincRNA              | NA          | DOWNSTREAM   |
| 11 | 68409281 | C | T | SNP | Hom | 212.03 | 42  | NA | ENSMUSG00000045915 | Ccdc42      | protein_coding       | NA          | INTRON       |
| 11 | 68910076 | G | T | SNP | Hom | 99.51  | 6   | NA | ENSMUSG00000020894 | Vamp2       | protein_coding       | NA          | DOWNSTREAM   |
| 11 | 69109927 | C | T | SNP | Hom | 687    | 24  | NA | ENSMUSG00000087003 | 1700067G0   | processed_transcript | NA          | DOWNSTREAM   |
| 11 | 69253975 | A | G | SNP | Hom | 445    | 13  | NA | ENSMUSG00000005237 | Dnahc2      | protein_coding       | NA          | INTRON       |
| 11 | 69316112 | G | T | SNP | Hom | 334.97 | 11  | NA | ENSMUSG00000005237 | Dnahc2      | protein_coding       | NA          | INTRON       |
| 11 | 69405425 | G | A | SNP | Hom | 444    | 13  | NA | ENSMUSG00000059552 | Trp53       | protein_coding       | NA          | DOWNSTREAM   |
| 11 | 69447165 | T | C | SNP | Hom | 907    | 32  | NA | ENSMUSG00000080573 | Mir467f     | miRNA                | NA          | DOWNSTREAM   |
| 11 | 70338563 | A | C | SNP | Hom | 964    | 32  | NA | ENSMUSG00000046811 | Gltpd2      | protein_coding       | NA          | DOWNSTREAM   |
| 11 | 71190336 | C | A | SNP | Hom | 1160   | 30  | NA |                    |             |                      | NA          | INTERGENIC   |
| 11 | 71491881 | G | T | SNP | Hom | 282.01 | 9   | NA |                    |             |                      | NA          | INTERGENIC   |
| 11 | 71836925 | T | G | SNP | Hom | 448    | 14  | NA | ENSMUSG00000080577 | U6atac.16   | snRNA                | NA          | DOWNSTREAM   |
| 11 | 72370465 | A | C | SNP | Hom | 166.13 | 12  | NA |                    |             |                      | NA          | INTERGENIC   |
| 11 | 73666274 | C | T | SNP | Hom | 684    | 19  | NA | ENSMUSG00000064228 | Olfr393     | protein_coding       | NA          | UPSTREAM     |
| 11 | 73740508 | A | T | SNP | Hom | 372    | 11  | NA | ENSMUSG00000086011 | Olfr396-ps1 | pseudogene           | NA          | UPSTREAM     |
| 11 | 73914573 | C | T | SNP | Hom | 758    | 21  | NA | ENSMUSG00000081162 | Olfr400-ps1 | pseudogene           | NA          | UPSTREAM     |
| 11 | 73988684 | A | G | SNP | Hom | 197.06 | 17  | NA |                    |             |                      | NA          | INTERGENIC   |
| 11 | 74151395 | A | C | SNP | Hom | 663    | 18  | NA | ENSMUSG00000063116 | Olfr410     | protein_coding       | NA          | UPSTREAM     |
| 11 | 74493173 | T | C | SNP | Hom | 694    | 21  | NA | ENSMUSG00000020745 | Pafah1b1    | protein_coding       | NA          | INTRON       |
| 11 | 74576813 | G | T | SNP | Hom | 1234   | 37  | NA |                    |             |                      | NA          | INTERGENIC   |
| 11 | 74723885 | T | A | SNP | Hom | 1430   | 37  | NA | ENSMUSG00000001323 | Srr         | protein_coding       | NA          | DOWNSTREAM   |
| 11 | 74797307 | G | T | SNP | Hom | 888    | 32  | NA | ENSMUSG00000038290 | Smg6        | protein_coding       | NA          | INTRON       |
| 11 | 75000595 | A | C | SNP | Hom | 295.97 | 19  | NA | ENSMUSG00000078789 | Dph1        | protein_coding       | NA          | INTRON       |
| 11 | 75000596 | A | G | SNP | Hom | 433    | 16  | NA | ENSMUSG00000017288 | Vps53       | protein_coding       | NA          | INTRON       |
| 11 | 76817264 | A | G | SNP | Hom | 592    | 17  | NA | ENSMUSG00000020838 | Slc6a4      | protein_coding       | NA          | INTRON       |
| 11 | 77011233 | A | G | SNP | Hom | 263.06 | 8   | NA |                    |             |                      | NA          | INTERGENIC   |
| 11 | 77553016 | G | A | SNP | Hom | 84.97  | 11  | NA | ENSMUSG00000037857 | Nufip2      | protein_coding       | NA          | INTRON       |
| 11 | 77557175 | A | G | SNP | Hom | 1195   | 36  | NA | ENSMUSG00000037857 | Nufip2      | protein_coding       | NA          | DOWNSTREAM   |
| 11 | 77762346 | A | C | SNP | Hom | 1032   | 29  | NA | ENSMUSG00000006632 | Sez6        | protein_coding       | NA          | INTRON       |
| 11 | 77762477 | C | T | SNP | Hom | 138.26 | 6   | NA | ENSMUSG00000006632 | Sez6        | protein_coding       | NA          | INTRON       |
| 11 | 77857230 | C | A | SNP | Hom | 517.02 | 22  | NA | ENSMUSG00000061981 | Flot2       | protein_coding       | NA          | INTRON       |
| 11 | 77904686 | G | T | SNP | Hom | 1459   | 40  | NA | ENSMUSG00000037750 | BC017647    | protein_coding       | NA          | UPSTREAM     |
| 11 | 78011962 | C | T | SNP | Hom | 891.06 | 29  | NA | ENSMUSG00000044122 | Proca1      | protein_coding       | NA          | INTRON       |
| 11 | 78284601 | G | T | SNP | Hom | 220.13 | 8   | NA | ENSMUSG00000050132 | Sarm1       | protein_coding       | NA          | DOWNSTREAM   |
| 11 | 78559023 | A | G | SNP | Hom | 513    | 15  | NA | ENSMUSG00000049489 | Fam58b      | protein_coding       | NA          | DOWNSTREAM   |
| 11 | 79003241 | C | T | SNP | Hom | 1816   | 99  | NA |                    |             |                      | NA          | INTERGENIC   |
| 11 | 79003303 | G | A | SNP | Hom | 2797   | 101 | NA |                    |             |                      | NA          | INTERGENIC   |
| 11 | 79065732 | G | T | SNP | Hom | 364    | 15  | NA | ENSMUSG00000017677 | Wsb1        | protein_coding       | NA          | INTRON       |
| 11 | 79800827 | G | T | SNP | Hom | 1093   | 36  | NA |                    |             |                      | NA          | INTERGENIC   |
| 11 | 80044019 | G | T | SNP | Hom | 642.54 | 31  | NA | ENSMUSG00000017686 | Rhot1       | protein_coding       | NA          | INTRON       |
| 11 | 80178710 | G | T | SNP | Hom | 1059   | 36  | NA | ENSMUSG00000057181 | 5730455P1   | protein_coding       | NA          | INTRON       |
| 11 | 80388301 | C | A | SNP | Hom | 235.01 | 10  | NA | ENSMUSG00000035441 | Myo1d       | protein_coding       | NA          | INTRON       |
| 11 | 80622422 | A | C | SNP | Hom | 951    | 30  | NA | ENSMUSG00000035413 | Tmem98      | protein_coding       | NA          | UPSTREAM     |
| 11 | 80999859 | G | C | SNP | Hom | 1244   | 33  | NA | ENSMUSG00000020704 | Accn1       | protein_coding       | NA          | INTRON       |
| 11 | 81000565 | C | A | SNP | Hom | 1435   | 39  | NA | ENSMUSG00000020704 | Accn1       | protein_coding       | NA          | INTRON       |
| 11 | 81434038 | C | A | SNP | Hom | 647    | 21  | NA | ENSMUSG00000020704 | Accn1       | protein_coding       | NA          | INTRON       |
| 11 | 81476471 | A | C | SNP | Hom | 619    | 16  | NA | ENSMUSG00000020704 | Accn1       | protein_coding       | NA          | INTRON       |
| 11 | 82601520 | A | G | SNP | Hom | 247.06 | 7   | NA | ENSMUSG00000020697 | Lig3        | protein_coding       | NA          | INTRON       |
| 11 | 82694980 | C | T | SNP | Hom | 465    | 13  | NA | ENSMUSG00000018841 | Rad51l3     | protein_coding       | NA          | INTRON       |
| 11 | 82931735 | G | A | SNP | Hom | 419    | 13  | NA | ENSMUSG00000078763 | Sifn1       | protein_coding       | NA          | INTRON       |
| 11 | 83143024 | T | C | SNP | Hom | 624    | 16  | NA | ENSMUSG00000035152 | Ap2b1       | protein_coding       | NA          | INTRON       |
| 11 | 83220064 | G | T | SNP | Hom | 219.13 | 7   | NA | ENSMUSG00000035152 | Ap2b1       | protein_coding       | NA          | DOWNSTREAM   |
| 11 | 83286412 | G | C | SNP | Hom | 1456   | 38  | NA | ENSMUSG00000020680 | Taf15       | protein_coding       | NA          | UPSTREAM     |
| 11 | 83479502 | A | G | SNP | Hom | 1613   | 43  | NA | ENSMUSG00000018930 | Ccl4        | protein_coding       | NA          | DOWNSTREAM   |
| 11 | 83956143 | C | A | SNP | Hom | 163.26 | 5   | NA | ENSMUSG00000020532 | Acaca       | protein_coding       | NA          | INTRON       |
| 11 | 84674773 | G | A | SNP | Hom | 1514   | 42  | NA | ENSMUSG00000020530 | Ggnbp2      | protein_coding       | NA          | INTRON       |
| 11 | 84992909 | T | C | SNP | Hom | 90.11  | 5   | NA | ENSMUSG00000018479 | 1700125H2   | protein_coding       | NA          | INTRON       |
| 11 | 85043220 | T | C | SNP | Hom | 822    | 30  | NA | ENSMUSG00000018481 | Appbp2      | protein_coding       | NA          | INTRON       |
| 11 | 85359123 | A | C | SNP | Hom | 862.41 | 32  | NA | ENSMUSG00000059439 | Bcas3       | protein_coding       | NA          | INTRON       |
| 11 | 85679835 | A | C | SNP | Hom | 565    | 15  | NA |                    |             |                      | NA          | INTERGENIC   |
| 11 | 85823915 | T | G | SNP | Hom | 1621   | 42  | NA |                    |             |                      | NA          | INTERGENIC   |
| 11 | 85964653 | C | G | SNP | Hom | 1607   | 43  | NA | ENSMUSG00000034329 | Brip1       | protein_coding       | NA          | INTRON       |
| 11 | 86084721 | T | A | SNP | Hom | 1040   | 35  | NA | ENSMUSG00000034297 | Med13       | protein_coding       | NA          | DOWNSTREAM   |
| 11 | 86136234 | G | A | SNP | Hom | 667    | 22  | NA | ENSMUSG00000034297 | Med13       | protein_coding       | NA          | INTRON       |
| 11 | 86553266 | G | T | SNP | Hom | 910.04 | 31  | NA | ENSMUSG00000047126 | Citc        | protein_coding       | NA          | INTRON       |
| 11 | 86637186 | G | A | SNP | Hom | 305.01 | 11  | NA |                    |             |                      | NA          | INTERGENIC   |
| 11 | 86637760 | C | T | SNP | Hom | 615    | 30  | NA |                    |             |                      | NA          | INTERGENIC   |
| 11 | 87288833 | G | T | SNP | Hom | 386    | 15  | NA | ENSMUSG00000070168 | U3.5        | snRNA                | NA          | DOWNSTREAM   |
| 11 | 88048269 | T | G | SNP | Hom | 1222   | 38  | NA |                    |             |                      | NA          | INTERGENIC   |
| 11 | 88309445 | T | C | SNP | Hom | 420    | 14  | NA | ENSMUSG00000069769 | Msi2        | protein_coding       | NA          | INTRON       |
| 11 | 88408825 | G | T | SNP | Hom | 1002   | 45  | NA | ENSMUSG00000069769 | Msi2        | protein_coding       | NA          | INTRON       |
| 11 | 88459680 | C | A | SNP | Hom | 300.03 | 9   | NA | ENSMUSG00000069769 | Msi2        | protein_coding       | NA          | INTRON       |
| 11 | 88459682 | A | G | SNP | Hom | 300.03 | 9   | NA | ENSMUSG00000069769 | Msi2        | protein_coding       | NA          | INTRON       |
| 11 | 88459719 | C | A | SNP | Hom | 1316   | 41  | NA | ENSMUSG00000069769 | Msi2        | protein_coding       | NA          | INTRON       |
| 11 | 88459722 | C | T | SNP | Hom | 1271   | 40  | NA | ENSMUSG00000069769 | Msi2        | protein_coding       | NA          | INTRON       |
| 11 | 88459741 | C | G | SNP | Hom | 886    | 29  | NA | ENSMUSG00000069769 | Msi2        | protein_coding       | NA          | INTRON       |
| 11 | 88459745 | A | A | SNP | Hom | 851    | 27  | NA | ENSMUSG00000069769 | Msi2        | protein_coding       | NA          | INTRON       |
| 11 | 88460027 | T | G | SNP | Hom | 521    | 17  | NA | ENSMUSG00000069769 | Msi2        | protein_coding       | NA          | INTRON       |
| 11 | 88903368 | C | A | SNP | Hom | 390    | 11  | NA | ENSMUSG0000000276  | Dgke        | protein_coding       | NA          | INTRON       |
| 11 | 89021216 | C | A | SNP | Hom | 606.54 | 24  | NA |                    |             |                      | NA          | INTERGENIC   |
| 11 | 89377944 | T | C | SNP | Hom | 1254   | 37  | NA | ENSMUSG00000047773 | Ankfn1      | protein_coding       | NA          | INTRON       |
| 11 | 90231349 | G | T | SNP | Hom | 1671   | 46  | NA | ENSMUSG00000003949 | Hlf         | protein_coding       | NA          | INTRON       |
| 11 | 90252994 | A | G | SNP | Hom | 385    | 12  | NA | ENSMUSG00000003949 | Hlf         | protein_coding       | NA          | UPSTREAM     |
| 11 | 90341985 | C | T | SNP | Hom | 448    | 13  | NA | ENSMUSG00000020546 | Stxbp4      | protein_coding       | exon_11_90: | 18 NS_CODING |
| 11 | 90674802 | G | C | SNP | Hom | 928    | 27  | NA | ENSMUSG00000085940 | 4930405D1   | processed_transcript | NA          | INTRON       |
| 11 | 90951742 | T | C | SNP | Hom | 445.17 | 16  | NA |                    |             |                      | NA          | INTERGENIC   |
| 11 | 91408581 | T | G | SNP | Hom | 505    | 17  | NA |                    |             |                      | NA          | INTERGENIC   |
| 11 | 92892753 | G | T | SNP | Hom | 1739   | 46  | NA |                    |             |                      | NA          | INTERGENIC   |

|    |           |   |   |     |     |         |     |    |                    |           |                      |             |             |
|----|-----------|---|---|-----|-----|---------|-----|----|--------------------|-----------|----------------------|-------------|-------------|
| 11 | 94225110  | T | C | SNP | Hom | 585     | 23  | NA | ENSMUSG00000020865 | Abcc3     | protein_coding       | NA          | DOWNSTREAM  |
| 11 | 94541624  | C | A | SNP | Hom | 1132    | 31  | NA | ENSMUSG00000085051 | Gm11542   | lincRNA              | NA          | INTRON      |
| 11 | 94541664  | C | T | SNP | Hom | 1265    | 36  | NA | ENSMUSG00000085051 | Gm11542   | lincRNA              | NA          | INTRON      |
| 11 | 94820611  | T | G | SNP | Hom | 629     | 17  | NA | ENSMUSG00000001508 | Sgca      | protein_coding       | NA          | DOWNSTREAM  |
| 11 | 95065932  | A | G | SNP | Hom | 539     | 23  | NA |                    |           |                      | NA          | INTERGENIC  |
| 11 | 95101851  | A | G | SNP | Hom | 1260    | 35  | NA |                    |           |                      | NA          | INTERGENIC  |
| 11 | 95144676  | T | A | SNP | Hom | 457     | 14  | NA | ENSMUSG00000038909 | Myst2     | protein_coding       | NA          | DOWNSTREAM  |
| 11 | 96299684  | C | T | SNP | Hom | 948     | 29  | NA |                    |           |                      | NA          | INTERGENIC  |
| 11 | 96460587  | A | T | SNP | Hom | 358     | 14  | NA | ENSMUSG00000057058 | Skap1     | protein_coding       | NA          | INTRON      |
| 11 | 96614971  | T | C | SNP | Hom | 786     | 29  | NA | ENSMUSG00000057058 | Skap1     | protein_coding       | NA          | INTRON      |
| 11 | 96648966  | G | T | SNP | Hom | 848     | 33  | NA | ENSMUSG00000018666 | Cbx1      | protein_coding       | NA          | UPSTREAM    |
| 11 | 96705229  | G | C | SNP | Hom | 750     | 25  | NA |                    |           |                      | NA          | INTERGENIC  |
| 11 | 96950730  | A | G | SNP | Hom | 558     | 16  | NA |                    |           |                      | NA          | INTERGENIC  |
| 11 | 97275072  | C | G | SNP | Hom | 1698    | 67  | NA | ENSMUSG00000049807 | Arhgap23  | protein_coding       | NA          | UPSTREAM    |
| 11 | 97411534  | T | C | SNP | Hom | 1789    | 48  | NA | ENSMUSG00000038453 | Srcin1    | protein_coding       | NA          | DOWNSTREAM  |
| 11 | 97698092  | A | G | SNP | Hom | 1787    | 46  | NA | ENSMUSG00000038366 | Lasp1     | protein_coding       | NA          | DOWNSTREAM  |
| 11 | 97827556  | G | A | SNP | Hom | 947     | 27  | NA | ENSMUSG00000017417 | Pldc1     | protein_coding       | NA          | INTRON      |
| 11 | 97849250  | T | C | SNP | Hom | 1758    | 47  | NA | ENSMUSG00000038352 | Ar15c     | protein_coding       | NA          | DOWNSTREAM  |
| 11 | 99083237  | T | C | SNP | Hom | 299.01  | 11  | NA | ENSMUSG00000037935 | Smarce1   | protein_coding       | NA          | DOWNSTREAM  |
| 11 | 99553667  | T | A | SNP | Hom | 1019.21 | 48  | NA | ENSMUSG00000078275 | Gm14192   | protein_coding       | NA          | DOWNSTREAM  |
| 11 | 99827570  | A | G | SNP | Hom | 386     | 11  | NA | ENSMUSG00000081547 | Gm11553   | pseudogene           | NA          | DOWNSTREAM  |
| 11 | 100779233 | A | G | SNP | Hom | 1565    | 42  | NA | ENSMUSG00000004040 | Stat3     | protein_coding       | NA          | INTRON      |
| 11 | 100937788 | C | G | SNP | Hom | 1902    | 51  | NA | ENSMUSG00000001751 | Naglu     | protein_coding       | exon_11_10f | 3 NS_CODING |
| 11 | 100989377 | G | T | SNP | Hom | 203.13  | 7   | NA | ENSMUSG00000035198 | Tubg1     | protein_coding       | NA          | DOWNSTREAM  |
| 11 | 101090632 | A | G | SNP | Hom | 1808    | 47  | NA | ENSMUSG00000006920 | Ezh1      | protein_coding       | NA          | UPSTREAM    |
| 11 | 101117446 | C | A | SNP | Hom | 1938    | 51  | NA | ENSMUSG00000001240 | Ramp2     | protein_coding       | NA          | INTRON      |
| 11 | 101182979 | C | G | SNP | Hom | 160.26  | 7   | NA | ENSMUSG00000078652 | Psm3      | protein_coding       | NA          | DOWNSTREAM  |
| 11 | 101419827 | A | G | SNP | Hom | 437     | 15  | NA | ENSMUSG00000017119 | Nbr1      | protein_coding       | NA          | INTRON      |
| 11 | 101825288 | C | G | SNP | Hom | 428     | 23  | NA | ENSMUSG00000071818 | 493041702 | processed_transcript | NA          | DOWNSTREAM  |
| 11 | 101961787 | T | A | SNP | Hom | 1077.05 | 46  | NA | ENSMUSG00000017316 | Ppy       | protein_coding       | NA          | INTRON      |
| 11 | 102428238 | A | G | SNP | Hom | 705     | 34  | NA |                    |           |                      | NA          | INTERGENIC  |
| 11 | 103207136 | T | C | SNP | Hom | 355     | 10  | NA | ENSMUSG00000034255 | Arhgap27  | protein_coding       | NA          | INTRON      |
| 11 | 103837151 | A | G | SNP | Hom | 1526    | 43  | NA | ENSMUSG00000062421 | Arf2      | protein_coding       | NA          | INTRON      |
| 11 | 103837152 | C | A | SNP | Hom | 1603    | 43  | NA | ENSMUSG00000062421 | Arf2      | protein_coding       | NA          | INTRON      |
| 11 | 105537692 | G | T | SNP | Hom | 158.26  | 5   | NA | ENSMUSG00000053580 | Tanc2     | protein_coding       | NA          | INTRON      |
| 11 | 105642290 | C | T | SNP | Hom | 1300    | 38  | NA | ENSMUSG00000053580 | Tanc2     | protein_coding       | NA          | DOWNSTREAM  |
| 11 | 106136423 | G | A | SNP | Hom | 1744    | 50  | NA | ENSMUSG00000020712 | Tcam1     | protein_coding       | NA          | UPSTREAM    |
| 11 | 106332890 | A | C | SNP | Hom | 1453    | 38  | NA | ENSMUSG00000020715 | Ern1      | protein_coding       | NA          | INTRON      |
| 11 | 106378404 | T | G | SNP | Hom | 88.97   | 6   | NA | ENSMUSG00000040548 | Tex2      | protein_coding       | NA          | INTRON      |
| 11 | 106580491 | C | A | SNP | Hom | 218.13  | 6   | NA | ENSMUSG00000020717 | Pecam1    | protein_coding       | NA          | INTRON      |
| 11 | 106914006 | T | C | SNP | Hom | 467     | 15  | NA | ENSMUSG00000040481 | Bptf      | protein_coding       | NA          | INTRON      |
| 11 | 107012799 | G | T | SNP | Hom | 327     | 14  | NA |                    |           |                      | NA          | INTERGENIC  |
| 11 | 107059653 | C | A | SNP | Hom | 206.06  | 9   | NA |                    |           |                      | NA          | INTERGENIC  |
| 11 | 107162311 | A | C | SNP | Hom | 1923    | 53  | NA | ENSMUSG00000040430 | Pitpnc1   | protein_coding       | NA          | INTRON      |
| 11 | 107365972 | G | T | SNP | Hom | 779     | 28  | NA | ENSMUSG00000020720 | Psm12     | protein_coding       | NA          | DOWNSTREAM  |
| 11 | 107399176 | T | G | SNP | Hom | 868     | 24  | NA | ENSMUSG00000059706 | A830035A1 | processed_transcript | NA          | INTRON      |
| 11 | 107399181 | T | G | SNP | Hom | 857     | 24  | NA | ENSMUSG00000059706 | A830035A1 | processed_transcript | NA          | INTRON      |
| 11 | 107682856 | A | C | SNP | Hom | 1467    | 41  | NA |                    |           |                      | NA          | INTERGENIC  |
| 11 | 107750347 | C | T | SNP | Hom | 342.01  | 15  | NA | ENSMUSG00000040373 | Cacng5    | protein_coding       | NA          | INTRON      |
| 11 | 107967175 | G | A | SNP | Hom | 160.26  | 5   | NA | ENSMUSG00000050965 | Prkca     | protein_coding       | NA          | INTRON      |
| 11 | 108564316 | A | T | SNP | Hom | 2004    | 55  | NA | ENSMUSG00000020728 | Ccdc46    | protein_coding       | NA          | INTRON      |
| 11 | 108695766 | A | T | SNP | Hom | 2069    | 54  | NA | ENSMUSG00000020728 | Ccdc46    | protein_coding       | NA          | INTRON      |
| 11 | 108873084 | T | C | SNP | Hom | 4534.01 | 250 | NA | ENSMUSG00000081392 | Gm11668   | pseudogene           | NA          | DOWNSTREAM  |
| 11 | 108873097 | A | G | SNP | Hom | 5578.01 | 250 | NA | ENSMUSG00000081392 | Gm11668   | pseudogene           | NA          | DOWNSTREAM  |
| 11 | 108873098 | T | C | SNP | Hom | 5838.01 | 250 | NA | ENSMUSG00000081392 | Gm11668   | pseudogene           | NA          | DOWNSTREAM  |
| 11 | 108873117 | T | G | SNP | Hom | 4538.01 | 250 | NA | ENSMUSG00000081392 | Gm11668   | pseudogene           | NA          | DOWNSTREAM  |
| 11 | 108873129 | A | G | SNP | Hom | 243     | 19  | NA | ENSMUSG00000081392 | Gm11668   | pseudogene           | NA          | DOWNSTREAM  |
| 11 | 108873250 | T | C | SNP | Hom | 5930.01 | 248 | NA | ENSMUSG00000081392 | Gm11668   | pseudogene           | NA          | DOWNSTREAM  |
| 11 | 108873256 | T | C | SNP | Hom | 5204.01 | 250 | NA | ENSMUSG00000081392 | Gm11668   | pseudogene           | NA          | DOWNSTREAM  |
| 11 | 108873278 | C | T | SNP | Hom | 4851.01 | 249 | NA | ENSMUSG00000081392 | Gm11668   | pseudogene           | NA          | DOWNSTREAM  |
| 11 | 108873282 | A | G | SNP | Hom | 4858.01 | 250 | NA | ENSMUSG00000081392 | Gm11668   | pseudogene           | NA          | DOWNSTREAM  |
| 11 | 108873313 | A | G | SNP | Hom | 4853.01 | 250 | NA | ENSMUSG00000081392 | Gm11668   | pseudogene           | NA          | DOWNSTREAM  |
| 11 | 108873333 | A | G | SNP | Hom | 5355.01 | 250 | NA | ENSMUSG00000081392 | Gm11668   | pseudogene           | NA          | DOWNSTREAM  |
| 11 | 108873349 | T | C | SNP | Hom | 6365.01 | 250 | NA | ENSMUSG00000081392 | Gm11668   | pseudogene           | NA          | DOWNSTREAM  |
| 11 | 108873364 | T | C | SNP | Hom | 6644.01 | 250 | NA | ENSMUSG00000081392 | Gm11668   | pseudogene           | NA          | DOWNSTREAM  |
| 11 | 109377958 | C | T | SNP | Hom | 511     | 15  | NA | ENSMUSG00000020604 | Arsg      | protein_coding       | NA          | INTRON      |
| 11 | 109739141 | C | A | SNP | Hom | 2430    | 94  | NA |                    |           |                      | NA          | INTERGENIC  |
| 11 | 109739170 | A | C | SNP | Hom | 1502    | 49  | NA |                    |           |                      | NA          | INTERGENIC  |
| 11 | 109739238 | A | C | SNP | Hom | 1748    | 100 | NA |                    |           |                      | NA          | INTERGENIC  |
| 11 | 109739241 | C | G | SNP | Hom | 1931    | 57  | NA |                    |           |                      | NA          | INTERGENIC  |
| 11 | 109765669 | A | C | SNP | Hom | 1159    | 35  | NA |                    |           |                      | NA          | INTERGENIC  |
| 11 | 109774772 | T | C | SNP | Hom | 1531    | 47  | NA |                    |           |                      | NA          | INTERGENIC  |
| 11 | 110018684 | G | T | SNP | Hom | 280.03  | 8   | NA | ENSMUSG00000041797 | Abca9     | protein_coding       | NA          | INTRON      |
| 11 | 110543045 | A | C | SNP | Hom | 2203    | 55  | NA |                    |           |                      | NA          | INTERGENIC  |
| 11 | 110900584 | T | A | SNP | Hom | 2032    | 52  | NA |                    |           |                      | NA          | INTERGENIC  |
| 11 | 111345478 | A | C | SNP | Hom | 193.13  | 6   | NA |                    |           |                      | NA          | INTERGENIC  |
| 11 | 111405296 | A | G | SNP | Hom | 799     | 24  | NA |                    |           |                      | NA          | INTERGENIC  |
| 11 | 111405343 | G | A | SNP | Hom | 894     | 26  | NA |                    |           |                      | NA          | INTERGENIC  |
| 11 | 111405349 | G | A | SNP | Hom | 844     | 26  | NA |                    |           |                      | NA          | INTERGENIC  |
| 11 | 111405358 | G | A | SNP | Hom | 698     | 21  | NA |                    |           |                      | NA          | INTERGENIC  |
| 11 | 111405377 | G | A | SNP | Hom | 549     | 17  | NA |                    |           |                      | NA          | INTERGENIC  |
| 11 | 111405392 | G | A | SNP | Hom | 394     | 14  | NA |                    |           |                      | NA          | INTERGENIC  |
| 11 | 111405427 | G | A | SNP | Hom | 400     | 14  | NA |                    |           |                      | NA          | INTERGENIC  |
| 11 | 111405435 | G | A | SNP | Hom | 527     | 17  | NA |                    |           |                      | NA          | INTERGENIC  |
| 11 | 111405447 | G | A | SNP | Hom | 668     | 21  | NA |                    |           |                      | NA          | INTERGENIC  |
| 11 | 111405455 | G | A | SNP | Hom | 622     | 21  | NA |                    |           |                      | NA          | INTERGENIC  |
| 11 | 111405461 | G | A | SNP | Hom | 595     | 20  | NA |                    |           |                      | NA          | INTERGENIC  |
| 11 | 111405467 | G | A | SNP | Hom | 514     | 19  | NA |                    |           |                      | NA          | INTERGENIC  |
| 11 | 111405477 | G | A | SNP | Hom | 559     | 19  | NA |                    |           |                      | NA          | INTERGENIC  |
| 11 | 111405486 | G | A | SNP | Hom | 689     | 24  | NA |                    |           |                      | NA          | INTERGENIC  |
| 11 | 111405494 | G | A | SNP | Hom | 613     | 22  | NA |                    |           |                      | NA          | INTERGENIC  |
| 11 | 111405516 | G | A | SNP | Hom | 614     | 22  | NA |                    |           |                      | NA          | INTERGENIC  |
| 11 | 111405528 | G | A | SNP | Hom | 739     | 24  | NA |                    |           |                      | NA          | INTERGENIC  |
| 11 | 111405534 | G | A | SNP | Hom | 617     | 22  | NA |                    |           |                      | NA          | INTERGENIC  |
| 11 | 111405546 | G | A | SNP | Hom | 699     | 22  | NA |                    |           |                      | NA          | INTERGENIC  |

|    |           |   |   |     |     |        |    |    |                    |           |                      |            |               |
|----|-----------|---|---|-----|-----|--------|----|----|--------------------|-----------|----------------------|------------|---------------|
| 11 | 111405558 | G | A | SNP | Hom | 877    | 29 | NA |                    |           | NA                   | INTERGENIC |               |
| 11 | 111957770 | C | T | SNP | Hom | 622    | 22 | NA |                    |           | NA                   | INTERGENIC |               |
| 11 | 111957780 | C | T | SNP | Hom | 587    | 21 | NA |                    |           | NA                   | INTERGENIC |               |
| 11 | 111957811 | T | C | SNP | Hom | 673    | 23 | NA |                    |           | NA                   | INTERGENIC |               |
| 11 | 111957820 | C | T | SNP | Hom | 649    | 22 | NA |                    |           | NA                   | INTERGENIC |               |
| 11 | 111957826 | T | A | SNP | Hom | 625    | 21 | NA |                    |           | NA                   | INTERGENIC |               |
| 11 | 111957833 | C | A | SNP | Hom | 624    | 21 | NA |                    |           | NA                   | INTERGENIC |               |
| 11 | 111957838 | A | T | SNP | Hom | 655    | 22 | NA |                    |           | NA                   | INTERGENIC |               |
| 11 | 111957846 | C | T | SNP | Hom | 708    | 25 | NA |                    |           | NA                   | INTERGENIC |               |
| 11 | 111957853 | A | T | SNP | Hom | 727    | 25 | NA |                    |           | NA                   | INTERGENIC |               |
| 11 | 111957873 | A | C | SNP | Hom | 749    | 25 | NA |                    |           | NA                   | INTERGENIC |               |
| 11 | 111957881 | T | A | SNP | Hom | 600    | 27 | NA |                    |           | NA                   | INTERGENIC |               |
| 11 | 111957894 | T | C | SNP | Hom | 780    | 25 | NA |                    |           | NA                   | INTERGENIC |               |
| 11 | 111957898 | T | C | SNP | Hom | 851    | 27 | NA |                    |           | NA                   | INTERGENIC |               |
| 11 | 111957902 | T | C | SNP | Hom | 791    | 25 | NA |                    |           | NA                   | INTERGENIC |               |
| 11 | 111957914 | T | C | SNP | Hom | 724    | 24 | NA |                    |           | NA                   | INTERGENIC |               |
| 11 | 111957928 | C | T | SNP | Hom | 820    | 26 | NA |                    |           | NA                   | INTERGENIC |               |
| 11 | 111957932 | C | T | SNP | Hom | 745    | 24 | NA |                    |           | NA                   | INTERGENIC |               |
| 11 | 111957943 | C | T | SNP | Hom | 602    | 20 | NA |                    |           | NA                   | INTERGENIC |               |
| 11 | 111957947 | C | T | SNP | Hom | 535.03 | 19 | NA |                    |           | NA                   | INTERGENIC |               |
| 11 | 111957951 | C | T | SNP | Hom | 468.13 | 17 | NA |                    |           | NA                   | INTERGENIC |               |
| 11 | 111957955 | C | T | SNP | Hom | 432.26 | 16 | NA |                    |           | NA                   | INTERGENIC |               |
| 11 | 111957959 | C | T | SNP | Hom | 408.05 | 15 | NA |                    |           | NA                   | INTERGENIC |               |
| 11 | 111957963 | C | T | SNP | Hom | 336.76 | 13 | NA |                    |           | NA                   | INTERGENIC |               |
| 11 | 111957967 | C | T | SNP | Hom | 334.76 | 13 | NA |                    |           | NA                   | INTERGENIC |               |
| 11 | 112068870 | A | G | SNP | Hom | 1772   | 51 | NA |                    |           | NA                   | INTERGENIC |               |
| 11 | 112112015 | A | G | SNP | Hom | 1076   | 35 | NA |                    |           | NA                   | INTERGENIC |               |
| 11 | 112475911 | A | G | SNP | Hom | 1942   | 50 | NA |                    |           | NA                   | INTERGENIC |               |
| 11 | 112613541 | T | G | SNP | Hom | 1441   | 42 | NA | ENSMUSG00000041674 | BC006965  | lincRNA              | NA         | INTRON        |
| 11 | 112626720 | G | T | SNP | Hom | 791    | 22 | NA | ENSMUSG00000041674 | BC006965  | lincRNA              | NA         | INTRON        |
| 11 | 112762294 | A | G | SNP | Hom | 580.03 | 23 | NA |                    |           |                      | NA         | INTERGENIC    |
| 11 | 113221444 | C | G | SNP | Hom | 1624   | 45 | NA | ENSMUSG00000041654 | Slc39a11  | protein_coding       | NA         | INTRON        |
| 11 | 113483695 | A | T | SNP | Hom | 741    | 19 | NA | ENSMUSG00000041654 | Slc39a11  | protein_coding       | NA         | INTRON        |
| 11 | 114002627 | T | C | SNP | Hom | 2130   | 65 | NA |                    |           |                      | NA         | INTERGENIC    |
| 11 | 114141419 | C | A | SNP | Hom | 841    | 25 | NA |                    |           |                      | NA         | INTERGENIC    |
| 11 | 114979024 | G | A | SNP | Hom | 2009   | 53 | NA |                    |           |                      | NA         | DOWNSTREAM    |
| 11 | 115413007 | C | A | SNP | Hom | 158.26 | 5  | NA | ENSMUSG00000047798 | Cd300lf   | protein_coding       | NA         | INTERGENIC    |
| 11 | 116458399 | C | T | SNP | Hom | 2050   | 58 | NA | ENSMUSG00000020806 | Rhbf2     | protein_coding       | NA         | DOWNSTREAM    |
| 11 | 116738570 | C | T | SNP | Hom | 1513   | 49 | NA | ENSMUSG00000020818 | Mfsd11    | protein_coding       | NA         | DOWNSTREAM    |
| 11 | 117643494 | T | G | SNP | Hom | 1653   | 46 | NA | ENSMUSG00000087486 | Gm11723   | processed_transcript | NA         | DOWNSTREAM    |
| 11 | 117886744 | A | T | SNP | Hom | 1963   | 56 | NA | ENSMUSG00000017715 | Pgs1      | protein_coding       | NA         | DOWNSTREAM    |
| 11 | 117886745 | G | A | SNP | Hom | 1993   | 57 | NA | ENSMUSG00000017715 | Pgs1      | protein_coding       | NA         | DOWNSTREAM    |
| 11 | 117960667 | A | C | SNP | Hom | 1141   | 35 | NA | ENSMUSG00000033987 | Dnahc17   | protein_coding       | NA         | INTRON        |
| 11 | 118502730 | A | G | SNP | Hom | 1675   | 49 | NA | ENSMUSG00000025576 | D11Bwg051 | protein_coding       | NA         | INTRON        |
| 11 | 118622410 | T | C | SNP | Hom | 1514   | 42 | NA | ENSMUSG00000025576 | D11Bwg051 | protein_coding       | NA         | INTRON        |
| 11 | 119307505 | C | T | SNP | Hom | 2188   | 59 | NA | ENSMUSG00000070327 | Rnf213    | protein_coding       | exon_11_11 | 30 SYN_CODING |
| 11 | 119560388 | A | G | SNP | Hom | 219.06 | 7  | NA | ENSMUSG00000025583 | Rptor     | protein_coding       | NA         | INTRON        |
| 11 | 119605099 | T | C | SNP | Hom | 2461   | 65 | NA | ENSMUSG00000025583 | Rptor     | protein_coding       | NA         | INTRON        |
| 11 | 120168102 | T | C | SNP | Hom | 2344   | 63 | NA |                    |           |                      | NA         | INTERGENIC    |
| 11 | 120179505 | G | T | SNP | Hom | 672    | 26 | NA |                    |           |                      | NA         | INTERGENIC    |
| 11 | 120199241 | G | T | SNP | Hom | 1372   | 45 | NA |                    |           |                      | NA         | INTERGENIC    |
| 11 | 120564230 | G | T | SNP | Hom | 1052   | 36 | NA | ENSMUSG00000025142 | Aspscr1   | protein_coding       | NA         | DOWNSTREAM    |
| 11 | 121454566 | T | C | SNP | Hom | 1174   | 34 | NA | ENSMUSG00000039230 | Tbcd      | protein_coding       | NA         | DOWNSTREAM    |

Indels

| Chromosome | Start    | Stop     | Reference | Change    | LenIndel | Change_type | Homozygous | Quality | Coverage | Warnings | Gene_ID            | Gene_name   | Bio_type         | Exon_ID    |
|------------|----------|----------|-----------|-----------|----------|-------------|------------|---------|----------|----------|--------------------|-------------|------------------|------------|
| 11         | 3832372  | 3832374  | *         | +TC       | 2        | INS         | Hom        | 148.98  | 12       | NA       | ENSMUSG00000020432 | Tcn2        | protein_coding   | UPSTREAM   |
| 11         | 3931573  | 3931574  | *         | -A        | 1        | DEL         | Hom        | 697.96  | 24       | NA       | ENSMUSG00000019368 | Sec14l4     | protein_coding   | INTRON     |
| 11         | 4591840  | 4591845  | *         | +AAAGG    | 5        | INS         | Hom        | 964.23  | 37       | NA       |                    |             |                  | INTERGENIC |
| 11         | 4593731  | 4593735  | *         | -CTTT     | 4        | DEL         | Hom        | 368.98  | 24       | NA       |                    |             |                  | INTERGENIC |
| 11         | 4754934  | 4754935  | *         | +T        | 1        | INS         | Hom        | 610.96  | 21       | NA       |                    |             |                  | INTERGENIC |
| 11         | 4914193  | 4914195  | *         | -CA       | 2        | DEL         | Hom        | 626.96  | 44       | NA       | ENSMUSG00000009090 | Ap1b1       | protein_coding   | INTRON     |
| 11         | 5204450  | 5204456  | *         | +ACACAC   | 6        | INS         | Hom        | 236.23  | 16       | NA       | ENSMUSG00000041961 | Znrf3       | protein_coding   | INTRON     |
| 11         | 5573084  | 5573092  | *         | -AACAAAC  | 8        | DEL         | Hom        | 1622.96 | 22       | NA       | ENSMUSG00000020481 | Ankrd36     | protein_coding   | INTRON     |
| 11         | 5661175  | 5661179  | *         | +TCTT     | 4        | INS         | Hom        | 493.97  | 19       | NA       | ENSMUSG00000049680 | Urgcp       | protein_coding   | INTRON     |
| 11         | 5720088  | 5720092  | *         | -GATA     | 4        | DEL         | Hom        | 310.1   | 14       | NA       | ENSMUSG00000080904 | Gm11966     | pseudogene       | UPSTREAM   |
| 11         | 5854708  | 5854712  | *         | -TCTT     | 4        | DEL         | Hom        | 209.23  | 27       | NA       | ENSMUSG00000041798 | Gck         | protein_coding   | UPSTREAM   |
| 11         | 6739469  | 6739474  | *         | -TTTTT    | 5        | DEL         | Hom        | 384.98  | 13       | NA       | ENSMUSG00000081213 | Gm11983     | pseudogene       | UPSTREAM   |
| 11         | 6775844  | 6775848  | *         | -TGTTG    | 4        | DEL         | Hom        | 258.1   | 22       | NA       |                    |             |                  | INTERGENIC |
| 11         | 6826472  | 6826477  | *         | -TTTTGT   | 5        | DEL         | Hom        | 565.13  | 29       | NA       |                    |             |                  | INTERGENIC |
| 11         | 7149652  | 7149653  | *         | -G        | 1        | DEL         | Hom        | 162.99  | 9        | NA       |                    |             |                  | INTERGENIC |
| 11         | 7335641  | 7335642  | *         | +G        | 1        | INS         | Hom        | 1625.96 | 41       | NA       |                    |             |                  | INTERGENIC |
| 11         | 8449180  | 8449181  | *         | +G        | 1        | INS         | Hom        | 1202.96 | 35       | NA       | ENSMUSG00000020422 | Tns3        | protein_coding   | INTRON     |
| 11         | 9292242  | 9292246  | *         | -ATCT     | 4        | DEL         | Hom        | 216.23  | 18       | NA       | ENSMUSG00000004668 | Abca13      | protein_coding   | INTRON     |
| 11         | 10204913 | 10204914 | *         | +A        | 1        | INS         | Hom        | 529.96  | 15       | NA       |                    |             |                  | INTERGENIC |
| 11         | 10248919 | 10248923 | *         | -GTGT     | 4        | DEL         | Hom        | 302.03  | 15       | NA       |                    |             |                  | INTERGENIC |
| 11         | 11588476 | 11588484 | *         | -ATAGATAG | 8        | DEL         | Hom        | 1258.96 | 22       | NA       | ENSMUSG00000018654 | Ikzf1       | protein_coding   | INTRON     |
| 11         | 11799182 | 11799186 | *         | +TGTG     | 4        | INS         | Hom        | 959.97  | 32       | NA       | ENSMUSG00000020182 | Ddc         | protein_coding   | UPSTREAM   |
| 11         | 11910782 | 11910783 | *         | -A        | 1        | DEL         | Hom        | 491.96  | 37       | NA       | ENSMUSG00000020176 | Grb10       | protein_coding   | INTRON     |
| 11         | 11927436 | 11927440 | *         | -ACAC     | 4        | DEL         | Hom        | 777.96  | 28       | NA       | ENSMUSG00000020176 | Grb10       | protein_coding   | INTRON     |
| 11         | 11931011 | 11931012 | *         | +G        | 1        | INS         | Hom        | 59.48   | 13       | NA       | ENSMUSG00000020176 | Grb10       | protein_coding   | INTRON     |
| 11         | 12747803 | 12747805 | *         | -TG       | 2        | DEL         | Hom        | 309.17  | 33       | NA       |                    |             |                  | INTERGENIC |
| 11         | 12827308 | 12827312 | *         | +AGAG     | 4        | INS         | Hom        | 263.1   | 28       | NA       |                    |             |                  | INTERGENIC |
| 11         | 12827900 | 12827905 | *         | -AAAAC    | 5        | DEL         | Hom        | 916.96  | 22       | NA       |                    |             |                  | INTERGENIC |
| 11         | 12915462 | 12915463 | *         | +T        | 1        | INS         | Hom        | 243.16  | 18       | NA       |                    |             |                  | INTERGENIC |
| 11         | 13235735 | 13235736 | *         | -A        | 1        | DEL         | Hom        | 143.1   | 9        | NA       |                    |             |                  | INTERGENIC |
| 11         | 13699250 | 13699251 | *         | +T        | 1        | INS         | Hom        | 150.05  | 15       | NA       |                    |             |                  | INTERGENIC |
| 11         | 13831158 | 13831162 | *         | +TTTTT    | 4        | INS         | Hom        | 693.96  | 25       | NA       |                    |             |                  | INTERGENIC |
| 11         | 14559067 | 14559068 | *         | -A        | 1        | DEL         | Hom        | 146.1   | 7        | NA       |                    |             |                  | INTERGENIC |
| 11         | 15420856 | 15420860 | *         | -GAAG     | 4        | DEL         | Hom        | 311.03  | 17       | NA       |                    |             |                  | INTERGENIC |
| 11         | 15423923 | 15423925 | *         | +CT       | 2        | INS         | Hom        | 160.48  | 8        | NA       |                    |             |                  | INTERGENIC |
| 11         | 15892460 | 15892461 | *         | +G        | 1        | INS         | Hom        | 563.96  | 16       | NA       |                    |             |                  | INTERGENIC |
| 11         | 16236393 | 16236397 | *         | -AGAA     | 4        | DEL         | Hom        | 194.23  | 17       | NA       | ENSMUSG00000048834 | Vstm2a      | protein_coding   | INTRON     |
| 11         | 16395209 | 16395210 | *         | +A        | 1        | INS         | Hom        | 625.96  | 30       | NA       |                    |             |                  | INTERGENIC |
| 11         | 16442280 | 16442281 | *         | +T        | 1        | INS         | Hom        | 1005.96 | 28       | NA       |                    |             |                  | INTERGENIC |
| 11         | 16443059 | 16443060 | *         | +T        | 1        | INS         | Hom        | 181.99  | 10       | NA       |                    |             |                  | INTERGENIC |
| 11         | 17154685 | 17154689 | *         | +TCTA     | 4        | INS         | Hom        | 428.98  | 27       | NA       | ENSMUSG00000000581 | C1d         | protein_coding   | UPSTREAM   |
| 11         | 17987749 | 17987751 | *         | -CA       | 2        | DEL         | Hom        | 145.03  | 17       | NA       |                    |             |                  | INTERGENIC |
| 11         | 18346489 | 18346494 | *         | +CTTTT    | 5        | INS         | Hom        | 543.97  | 27       | NA       |                    |             |                  | INTERGENIC |
| 11         | 18427060 | 18427061 | *         | +A        | 1        | INS         | Hom        | 694.96  | 19       | NA       |                    |             |                  | INTERGENIC |
| 11         | 18479080 | 18479084 | *         | +AATT     | 4        | INS         | Hom        | 589.96  | 25       | NA       | ENSMUSG00000081101 | Gm12024     | pseudogene       | UPSTREAM   |
| 11         | 21235151 | 21235157 | *         | -AAGAAG   | 6        | DEL         | Hom        | 399.1   | 7        | NA       | ENSMUSG00000001891 | Ugp2        | protein_coding   | INTRON     |
| 11         | 21692620 | 21692621 | *         | -A        | 1        | DEL         | Hom        | 358.99  | 28       | NA       | ENSMUSG00000020319 | AV249152    | protein_coding   | INTRON     |
| 11         | 21929933 | 21929937 | *         | -TCTA     | 4        | DEL         | Hom        | 151.48  | 14       | NA       | ENSMUSG00000042302 | Ehbp1       | protein_coding   | INTRON     |
| 11         | 22614917 | 22614922 | *         | +TTTTTG   | 5        | INS         | Hom        | 963.96  | 29       | NA       |                    |             |                  | INTERGENIC |
| 11         | 23406424 | 23406425 | *         | -C        | 1        | DEL         | Hom        | 144     | 25       | NA       |                    |             |                  | INTERGENIC |
| 11         | 23486952 | 23486960 | *         | -AGGCAGAG | 8        | DEL         | Hom        | 478.03  | 22       | NA       | ENSMUSG00000042208 | 0610010F05f | protein_coding   | INTRON     |
| 11         | 23888911 | 23888912 | *         | +T        | 1        | INS         | Hom        | 507.96  | 27       | NA       |                    |             |                  | INTERGENIC |
| 11         | 23941245 | 23941246 | *         | +A        | 1        | INS         | Hom        | 427.5   | 22       | NA       |                    |             |                  | INTERGENIC |
| 11         | 24079749 | 24079753 | *         | +AAAC     | 4        | INS         | Hom        | 608.96  | 28       | NA       |                    |             |                  | INTERGENIC |
| 11         | 24542220 | 24542224 | *         | -TATC     | 4        | DEL         | Hom        | 704.96  | 28       | NA       | ENSMUSG00000087085 | Gm12068     | processed_transc | INTRON     |
| 11         | 24825565 | 24825566 | *         | +A        | 1        | INS         | Hom        | 603.96  | 30       | NA       | ENSMUSG00000087145 | Gm12665     | processed_transc | INTRON     |
| 11         | 24965757 | 24965761 | *         | -CCTT     | 4        | DEL         | Hom        | 241.23  | 14       | NA       |                    |             |                  | INTERGENIC |
| 11         | 25918072 | 25918076 | *         | -TGTTG    | 4        | DEL         | Hom        | 668.96  | 42       | NA       | ENSMUSG00000032985 | 5730522E02f | protein_coding   | INTRON     |
| 11         | 26217627 | 26217628 | *         | +G        | 1        | INS         | Hom        | 296.99  | 12       | NA       |                    |             |                  | INTERGENIC |
| 11         | 26241603 | 26241604 | *         | +C        | 1        | INS         | Hom        | 1388.96 | 40       | NA       | ENSMUSG00000065889 | U1.105      | snRNA            | UPSTREAM   |
| 11         | 26519450 | 26519454 | *         | -CTAT     | 4        | DEL         | Hom        | 253.1   | 32       | NA       |                    |             |                  | INTERGENIC |
| 11         | 27110540 | 27110541 | *         | +A        | 1        | INS         | Hom        | 365.96  | 19       | NA       |                    |             |                  | INTERGENIC |
| 11         | 27132297 | 27132298 | *         | +A        | 1        | INS         | Hom        | 77.05   | 16       | NA       |                    |             |                  | INTERGENIC |
| 11         | 27843082 | 27843083 | *         | +A        | 1        | INS         | Hom        | 154.03  | 8        | NA       |                    |             |                  | INTERGENIC |
| 11         | 27844190 | 27844194 | *         | +TCTT     | 4        | INS         | Hom        | 251.23  | 15       | NA       |                    |             |                  | INTERGENIC |
| 11         | 28023623 | 28023625 | *         | -TG       | 2        | DEL         | Hom        | 485.42  | 24       | NA       |                    |             |                  | INTERGENIC |
| 11         | 28844396 | 28844397 | *         | +A        | 1        | INS         | Hom        | 649.96  | 19       | NA       |                    |             |                  | INTERGENIC |
| 11         | 29036202 | 29036214 | *         | +AAGGAAGG | 12       | INS         | Hom        | 1039.99 | 14       | NA       | ENSMUSG00000020464 | Pnpt1       | protein_coding   | INTRON     |
| 11         | 29250061 | 29250067 | *         | -ACAGAC   | 6        | DEL         | Hom        | 447.97  | 29       | NA       | ENSMUSG00000082721 | Gm12087     | pseudogene       | UPSTREAM   |
| 11         | 29358723 | 29358724 | *         | +A        | 1        | INS         | Hom        | 110.1   | 12       | NA       | ENSMUSG00000032740 | Ccd88a      | protein_coding   | INTRON     |
| 11         | 29634339 | 29634340 | *         | +G        | 1        | INS         | Hom        | 346.98  | 9        | NA       | ENSMUSG00000020458 | Rtn4        | protein_coding   | INTRON     |
| 11         | 29763616 | 29763617 | *         | +A        | 1        | INS         | Hom        | 966.96  | 33       | NA       | ENSMUSG00000044072 | Eml6        | protein_coding   | INTRON     |
| 11         | 30674740 | 30674743 | *         | -TTA      | 3        | DEL         | Hom        | 161.48  | 10       | NA       | ENSMUSG00000040850 | Psme4       | protein_coding   | INTRON     |
| 11         | 31279119 | 31279120 | *         | +G        | 1        | INS         | Hom        | 704.97  | 40       | NA       |                    |             |                  | INTERGENIC |
| 11         | 31551184 | 31551190 | *         | -TGTGTG   | 6        | DEL         | Hom        | 346.03  | 27       | NA       |                    |             |                  | INTERGENIC |
| 11         | 31898074 | 31898080 | *         | -TTGTTG   | 6        | DEL         | Hom        | 737.96  | 18       | NA       | ENSMUSG00000020297 | Nsg2        | protein_coding   | UPSTREAM   |
| 11         | 31918103 | 31918108 | *         | -TTTTT    | 5        | DEL         | Hom        | 469.05  | 31       | NA       | ENSMUSG00000020297 | Nsg2        | protein_coding   | INTRON     |
| 11         | 31966875 | 31966879 | *         | +TCCT     | 4        | INS         | Hom        | 1602.96 | 29       | NA       |                    |             |                  | INTERGENIC |
| 11         | 32258990 | 32258994 | *         | -TCTT     | 4        | DEL         | Hom        | 343.99  | 18       | NA       | ENSMUSG00000040711 | Sh3pxd2b    | protein_coding   | INTRON     |
| 11         | 32488480 | 32488483 | *         | -TTG      | 3        | DEL         | Hom        | 649.96  | 17       | NA       | ENSMUSG00000020272 | Stk10       | protein_coding   | INTRON     |
| 11         | 32821528 | 32821529 | *         | +T        | 1        | INS         | Hom        | 582.96  | 31       | NA       | ENSMUSG00000085402 | Gm12111     | processed_transc | INTRON     |
| 11         | 32891271 | 32891272 | *         | +C        | 1        | INS         | Hom        | 945.96  | 29       | NA       |                    |             |                  | INTERGENIC |
| 11         | 33610837 | 33610841 | *         | -CTTT     | 4        | DEL         | Hom        | 374.99  | 19       | NA       | ENSMUSG00000053519 | Kcnp1       | protein_coding   | INTRON     |
| 11         | 34352779 | 34352785 | *         | -TCTCTG   | 6        | DEL         | Hom        | 377.98  | 29       | NA       | ENSMUSG00000020143 | Dock2       | protein_coding   | INTRON     |
| 11         | 34442842 | 34442843 | *         | -C        | 1        | DEL         | Hom        | 182.23  | 5        | NA       | ENSMUSG00000020143 | Dock2       | protein_coding   | INTRON     |
| 11         | 34846927 | 34846928 | *         | +A        | 1        | INS         | Hom        | 636.96  | 18       | NA       |                    |             |                  | INTERGENIC |
| 11         | 35175481 | 35175489 | *         | +GATAGATA | 8        | INS         | Hom        | 300.23  | 19       | NA       | ENSMUSG00000056427 | Slit3       | protein_coding   | INTRON     |
| 11         | 35424726 | 35424730 | *         | -AGAT     | 4        | DEL         | Hom        | 500.97  | 32       | NA       | ENSMUSG00000056427 | Slit3       | protein_coding   | INTRON     |
| 11         | 36003803 | 36003804 | *         | +A        | 1        | INS         | Hom        | 155.05  | 14       | NA       | ENSMUSG00000049336 | Od2         | protein_coding   | INTRON     |
| 11         | 36300826 | 36300842 | *         | +TGTGTGTG | 16       | INS         | Hom        | 2074.96 | 20       | NA       | ENSMUSG00000049336 | Od2         | protein_coding   | INTRON     |
| 11         | 37465329 | 37465335 | *         | -TGTGTG   | 6        | DEL         | Hom        | 523.99  | 16       | NA       |                    |             |                  | INTERGENIC |
| 11         | 38342738 | 38342739 | *         | -G        | 1        | DEL         | Hom        | 1624.96 | 42       | NA       |                    |             |                  | INTERGENIC |

| Chromosome | Start    | Stop     | Reference | Change       | LenIndel | Change_type | Homozygous | Quality | Coverage | Warnings | Gene_ID            | Gene_name   | Bio_type         | Exon_ID    |
|------------|----------|----------|-----------|--------------|----------|-------------|------------|---------|----------|----------|--------------------|-------------|------------------|------------|
| 11         | 38815738 | 38815739 | *         | +T           | 1        | INS         | Hom        | 1407.96 | 40       | NA       |                    |             |                  | INTERGENIC |
| 11         | 38846405 | 38846406 | *         | +A           | 1        | INS         | Hom        | 48.5    | 8        | NA       |                    |             |                  | INTERGENIC |
| 11         | 39544073 | 39544074 | *         | -T           | 1        | DEL         | Hom        | 458.96  | 24       | NA       | ENSMUSG00000083806 | Gm12131     | pseudogene       | UPSTREAM   |
| 11         | 39548273 | 39548275 | *         | -TG          | 2        | DEL         | Hom        | 450.09  | 22       | NA       |                    |             |                  | INTERGENIC |
| 11         | 39868123 | 39868124 | *         | -G           | 1        | DEL         | Hom        | 366.98  | 10       | NA       | ENSMUSG00000085301 | Gm12132     | processed_transc | INTRON     |
| 11         | 39920010 | 39920011 | *         | -G           | 1        | DEL         | Hom        | 282.99  | 18       | NA       | ENSMUSG00000085301 | Gm12132     | processed_transc | INTRON     |
| 11         | 40973428 | 40973432 | *         | -ATCT        | 4        | DEL         | Hom        | 291.1   | 19       | NA       |                    |             |                  | INTERGENIC |
| 11         | 40976418 | 40976440 | *         | -TCTCTCTCTC1 | 22       | DEL         | Hom        | 818.03  | 16       | NA       |                    |             |                  | INTERGENIC |
| 11         | 41120107 | 41120108 | *         | -C           | 1        | DEL         | Hom        | 50.48   | 12       | NA       |                    |             |                  | INTERGENIC |
| 11         | 41800265 | 41800266 | *         | +T           | 1        | INS         | Hom        | 167.73  | 18       | NA       | ENSMUSG00000020436 | Gabrg2      | protein_coding   | INTRON     |
| 11         | 42089665 | 42089666 | *         | +T           | 1        | INS         | Hom        | 1164.96 | 32       | NA       |                    |             |                  | INTERGENIC |
| 11         | 42162791 | 42162795 | *         | -TTTC        | 4        | DEL         | Hom        | 390.98  | 23       | NA       |                    |             |                  | INTERGENIC |
| 11         | 42259888 | 42259889 | *         | -A           | 1        | DEL         | Hom        | 349.96  | 18       | NA       | ENSMUSG00000007653 | Gabrb2      | protein_coding   | INTRON     |
| 11         | 42371197 | 42371198 | *         | +A           | 1        | INS         | Hom        | 380.01  | 19       | NA       | ENSMUSG00000007653 | Gabrb2      | protein_coding   | INTRON     |
| 11         | 42541340 | 42541341 | *         | -G           | 1        | DEL         | Hom        | 104.5   | 16       | NA       |                    |             |                  | INTERGENIC |
| 11         | 43004957 | 43004960 | *         | -AAG         | 3        | DEL         | Hom        | 123.48  | 20       | NA       | ENSMUSG00000055415 | Atp10b      | protein_coding   | INTRON     |
| 11         | 43087407 | 43087411 | *         | -AGAT        | 4        | DEL         | Hom        | 129.93  | 16       | NA       | ENSMUSG00000086791 | Gm12147     | processed_transc | INTRON     |
| 11         | 43219067 | 43219068 | *         | -A           | 1        | DEL         | Hom        | 177.98  | 13       | NA       |                    |             |                  | INTERGENIC |
| 11         | 43224632 | 43224642 | *         | -TCTCTCTCTC  | 10       | DEL         | Hom        | 471.1   | 13       | NA       |                    |             |                  | INTERGENIC |
| 11         | 43411640 | 43411648 | *         | -ATAGATAG    | 8        | DEL         | Hom        | 664.98  | 16       | NA       | ENSMUSG00000020405 | Fabp6       | protein_coding   | INTRON     |
| 11         | 44636159 | 44636163 | *         | -TATC        | 4        | DEL         | Hom        | 455.97  | 29       | NA       | ENSMUSG00000057098 | Ebf1        | protein_coding   | INTRON     |
| 11         | 44971474 | 44971475 | *         | -A           | 1        | DEL         | Hom        | 116.1   | 16       | NA       | ENSMUSG00000080789 | Gm12160     | processed_transc | UPSTREAM   |
| 11         | 45518054 | 45518056 | *         | -GC          | 2        | DEL         | Hom        | 994.96  | 27       | NA       |                    |             |                  | INTERGENIC |
| 11         | 45518739 | 45518743 | *         | -TTTG        | 4        | DEL         | Hom        | 506.97  | 22       | NA       |                    |             |                  | INTERGENIC |
| 11         | 45532704 | 45532705 | *         | +G           | 1        | INS         | Hom        | 81.48   | 10       | NA       |                    |             |                  | INTERGENIC |
| 11         | 45771302 | 45771303 | *         | +A           | 1        | INS         | Hom        | 458.96  | 18       | NA       | ENSMUSG00000011254 | Thg1l       | protein_coding   | UPSTREAM   |
| 11         | 45791496 | 45791500 | *         | -CACAA       | 4        | DEL         | Hom        | 912.96  | 25       | NA       | ENSMUSG00000040489 | Sox30       | protein_coding   | UPSTREAM   |
| 11         | 46396588 | 46396589 | *         | -T           | 1        | DEL         | Hom        | 250.75  | 38       | NA       | ENSMUSG00000046974 | BC053393    | protein_coding   | INTRON     |
| 11         | 47136187 | 47136189 | *         | +AA          | 2        | INS         | Hom        | 168.03  | 14       | NA       | ENSMUSG00000020354 | Sgcd        | protein_coding   | INTRON     |
| 11         | 47387328 | 47387333 | *         | +GATAT       | 5        | INS         | Hom        | 233.48  | 11       | NA       | ENSMUSG00000020354 | Sgcd        | protein_coding   | INTRON     |
| 11         | 47767916 | 47767920 | *         | -ATCT        | 4        | DEL         | Hom        | 346.03  | 22       | NA       | ENSMUSG00000020354 | Sgcd        | protein_coding   | INTRON     |
| 11         | 48202928 | 48202929 | *         | +C           | 1        | INS         | Hom        | 315.37  | 22       | NA       |                    |             |                  | INTERGENIC |
| 11         | 48294976 | 48294977 | *         | -C           | 1        | DEL         | Hom        | 179.17  | 22       | NA       |                    |             |                  | INTERGENIC |
| 11         | 48305787 | 48305791 | *         | -GATA        | 4        | DEL         | Hom        | 503.96  | 22       | NA       |                    |             |                  | INTERGENIC |
| 11         | 48377869 | 48377870 | *         | +T           | 1        | INS         | Hom        | 257.37  | 23       | NA       | ENSMUSG00000083159 | Gm12180     | pseudogene       | UPSTREAM   |
| 11         | 48529142 | 48529146 | *         | -GTGT        | 4        | DEL         | Hom        | 450.1   | 33       | NA       |                    |             |                  | INTERGENIC |
| 11         | 48692792 | 48692800 | *         | -AATAAATA    | 8        | DEL         | Hom        | 394.23  | 12       | NA       |                    |             |                  | INTERGENIC |
| 11         | 49042740 | 49042744 | *         | -TTCC        | 4        | DEL         | Hom        | 244.1   | 32       | NA       |                    |             |                  | INTERGENIC |
| 11         | 49222486 | 49222487 | *         | -A           | 1        | DEL         | Hom        | 88.1    | 13       | NA       | ENSMUSG00000084278 | Gm12189     | pseudogene       | DOWNSTREAM |
| 11         | 49357553 | 49357554 | *         | +A           | 1        | INS         | Hom        | 400.96  | 23       | NA       |                    |             |                  | INTERGENIC |
| 11         | 49521283 | 49521285 | *         | +TT          | 2        | INS         | Hom        | 671.96  | 16       | NA       | ENSMUSG00000020362 | Cnot6       | protein_coding   | INTRON     |
| 11         | 49818152 | 49818153 | *         | -C           | 1        | DEL         | Hom        | 377.96  | 17       | NA       |                    |             |                  | INTERGENIC |
| 11         | 51052299 | 51052300 | *         | -A           | 1        | DEL         | Hom        | 524.96  | 22       | NA       | ENSMUSG00000061469 | Gm12569     | processed_transc | DOWNSTREAM |
| 11         | 51065625 | 51065628 | *         | -ACA         | 3        | DEL         | Hom        | 1188.96 | 23       | NA       | ENSMUSG00000045942 | BC049762    | protein_coding   | DOWNSTREAM |
| 11         | 51464621 | 51464622 | *         | +G           | 1        | INS         | Hom        | 309.98  | 18       | NA       | ENSMUSG00000001053 | N4bp3       | protein_coding   | UPSTREAM   |
| 11         | 52117523 | 52117524 | *         | -A           | 1        | DEL         | Hom        | 802.96  | 25       | NA       |                    |             |                  | INTERGENIC |
| 11         | 52604326 | 52604334 | *         | -CTATCTAT    | 8        | DEL         | Hom        | 982.96  | 34       | NA       | ENSMUSG00000036264 | Fstl4       | protein_coding   | INTRON     |
| 11         | 52608698 | 52608702 | *         | +CTGT        | 4        | INS         | Hom        | 571.96  | 34       | NA       | ENSMUSG00000036264 | Fstl4       | protein_coding   | INTRON     |
| 11         | 53028056 | 53028058 | *         | -AC          | 2        | DEL         | Hom        | 262.99  | 30       | NA       |                    |             |                  | INTERGENIC |
| 11         | 53535176 | 53535177 | *         | +A           | 1        | INS         | Hom        | 242.6   | 21       | NA       | ENSMUSG00000086595 | Gm12214     | processed_transc | DOWNSTREAM |
| 11         | 53583671 | 53583672 | *         | -G           | 1        | DEL         | Hom        | 312.97  | 20       | NA       | ENSMUSG00000091191 | AL596182.1  | protein_coding   | DOWNSTREAM |
| 11         | 53813037 | 53813038 | *         | -G           | 1        | DEL         | Hom        | 2558.96 | 74       | NA       | ENSMUSG00000020334 | Slc22a4     | protein_coding   | INTRON     |
| 11         | 54330429 | 54330433 | *         | -AAGA        | 4        | DEL         | Hom        | 455.99  | 12       | NA       | ENSMUSG00000035992 | Frip1       | protein_coding   | UTR        |
| 11         | 54613865 | 54613869 | *         | +TTGG        | 4        | INS         | Hom        | 488.97  | 36       | NA       |                    |             |                  | INTERGENIC |
| 11         | 55004409 | 55004413 | *         | +TCTA        | 4        | INS         | Hom        | 308.03  | 18       | NA       | ENSMUSG00000084980 | 4921508A21l | processed_transc | DOWNSTREAM |
| 11         | 55101765 | 55101767 | *         | -GT          | 2        | DEL         | Hom        | 371.96  | 48       | NA       | ENSMUSG00000055333 | Fat2        | protein_coding   | INTRON     |
| 11         | 55108619 | 55108624 | *         | +AGAAG       | 5        | INS         | Hom        | 476.97  | 15       | NA       | ENSMUSG00000055333 | Fat2        | protein_coding   | INTRON     |
| 11         | 55737142 | 55737146 | *         | -TCTA        | 4        | DEL         | Hom        | 187.48  | 14       | NA       | ENSMUSG00000086020 | Gm12239     | processed_transc | INTRON     |
| 11         | 56034332 | 56034335 | *         | -TAC         | 3        | DEL         | Hom        | 489.96  | 21       | NA       |                    |             |                  | INTERGENIC |
| 11         | 56242865 | 56242869 | *         | -CTAT        | 4        | DEL         | Hom        | 417.98  | 25       | NA       |                    |             |                  | INTERGENIC |
| 11         | 56678570 | 56678574 | *         | -AGAT        | 4        | DEL         | Hom        | 434.99  | 18       | NA       |                    |             |                  | INTERGENIC |
| 11         | 57214798 | 57214800 | *         | -GT          | 2        | DEL         | Hom        | 461.96  | 28       | NA       |                    |             |                  | INTERGENIC |
| 11         | 57315649 | 57315653 | *         | +ATAC        | 4        | INS         | Hom        | 318.03  | 18       | NA       | ENSMUSG00000020523 | Fam114a2    | protein_coding   | INTRON     |
| 11         | 57851560 | 57851564 | *         | +ATTG        | 4        | INS         | Hom        | 993.97  | 38       | NA       | ENSMUSG00000037331 | Larp1       | protein_coding   | INTRON     |
| 11         | 58080547 | 58080551 | *         | -TCTA        | 4        | DEL         | Hom        | 104.93  | 13       | NA       |                    |             |                  | INTERGENIC |
| 11         | 58401328 | 58401329 | *         | -A           | 1        | DEL         | Hom        | 570.96  | 34       | NA       |                    |             |                  | INTERGENIC |
| 11         | 58622601 | 58622605 | *         | -TCTA        | 4        | DEL         | Hom        | 234.23  | 15       | NA       |                    |             |                  | INTERGENIC |
| 11         | 58718179 | 58718189 | *         | +TGTGTGTGT   | 10       | INS         | Hom        | 699.97  | 18       | NA       | ENSMUSG00000037001 | Zfp39       | protein_coding   | UPSTREAM   |
| 11         | 59239447 | 59239448 | *         | -C           | 1        | DEL         | Hom        | 1020.96 | 35       | NA       | ENSMUSG00000099894 | Snap47      | protein_coding   | INTRON     |
| 11         | 59388242 | 59388250 | *         | -TATCTATC    | 8        | DEL         | Hom        | 806.96  | 25       | NA       | ENSMUSG00000059610 | Olfir222    | protein_coding   | UPSTREAM   |
| 11         | 59670708 | 59670709 | *         | +T           | 1        | INS         | Hom        | 381.97  | 27       | NA       | ENSMUSG00000032615 | Nt5m        | protein_coding   | INTRON     |
| 11         | 59864504 | 59864508 | *         | +AGAA        | 4        | INS         | Hom        | 367.98  | 20       | NA       | ENSMUSG00000000301 | Pemt        | protein_coding   | UPSTREAM   |
| 11         | 59871389 | 59871393 | *         | +GAAA        | 4        | INS         | Hom        | 554.97  | 17       | NA       |                    |             |                  | INTERGENIC |
| 11         | 60115132 | 60115133 | *         | -T           | 1        | DEL         | Hom        | 697.96  | 28       | NA       | ENSMUSG00000000538 | Tom1l2      | protein_coding   | INTRON     |
| 11         | 60737599 | 60737603 | *         | -TCTT        | 4        | DEL         | Hom        | 347.01  | 16       | NA       | ENSMUSG00000042549 | Gm16516     | processed_transc | INTRON     |
| 11         | 60949082 | 60949086 | *         | -TTTC        | 4        | DEL         | Hom        | 213.37  | 28       | NA       | ENSMUSG00000010142 | Tnfrsf13b   | protein_coding   | INTRON     |
| 11         | 60962982 | 60962983 | *         | +A           | 1        | INS         | Hom        | 196.97  | 16       | NA       | ENSMUSG00000010142 | Tnfrsf13b   | protein_coding   | DOWNSTREAM |
| 11         | 61285479 | 61285483 | *         | -GAAG        | 4        | DEL         | Hom        | 698.96  | 38       | NA       |                    |             |                  | INTERGENIC |
| 11         | 61308078 | 61308079 | *         | +G           | 1        | INS         | Hom        | 149.23  | 8        | NA       | ENSMUSG00000001034 | Mapk7       | protein_coding   | UPSTREAM   |
| 11         | 62305131 | 62305135 | *         | -AAGA        | 4        | DEL         | Hom        | 359.03  | 17       | NA       | ENSMUSG00000014245 | Pigl        | protein_coding   | INTRON     |
| 11         | 62576604 | 62576605 | *         | -A           | 1        | DEL         | Hom        | 103.07  | 11       | NA       | ENSMUSG00000047342 | Zfp286      | protein_coding   | INTRON     |
| 11         | 62781779 | 62781780 | *         | -C           | 1        | DEL         | Hom        | 221.23  | 18       | NA       | ENSMUSG00000042200 | Cdr4        | protein_coding   | INTRON     |
| 11         | 62825904 | 62825908 | *         | -TATC        | 4        | DEL         | Hom        | 222.23  | 10       | NA       |                    |             |                  | INTERGENIC |
| 11         | 62979963 | 62979964 | *         | +G           | 1        | INS         | Hom        | 416.96  | 23       | NA       |                    |             |                  | INTERGENIC |
| 11         | 63652173 | 63652174 | *         | +A           | 1        | INS         | Hom        | 1811.96 | 51       | NA       |                    |             |                  | INTERGENIC |
| 11         | 64568184 | 64568186 | *         | -AC          | 2        | DEL         | Hom        | 120.07  | 31       | NA       |                    |             |                  | INTERGENIC |
| 11         | 65188813 | 65188814 | *         | -C           | 1        | DEL         | Hom        | 405.96  | 28       | NA       |                    |             |                  | INTERGENIC |
| 11         | 66002685 | 66002686 | *         | +A           | 1        | INS         | Hom        | 275.96  | 15       | NA       | ENSMUSG00000084967 | Gm12296     | lincRNA          | INTRON     |
| 11         | 66230244 | 66230248 | *         | -TCTA        | 4        | DEL         | Hom        | 362.97  | 22       | NA       | ENSMUSG00000053930 | Shisa6      | protein_coding   | INTRON     |
| 11         | 67243056 | 67243060 | *         | -CACAA       | 4        | DEL         | Hom        | 322.17  | 25       | NA       |                    |             |                  | INTERGENIC |
| 11         | 68003648 | 68003649 | *         | +G           | 1        | INS         | Hom        | 1131.96 | 34       | NA       | ENSMUSG00000020903 | Stx8        | protein_coding   | INTRON     |
| 11         | 68381800 | 68381801 | *         | -T           | 1        | DEL         | Hom        | 121.98  | 14       | NA       |                    |             |                  | INTERGENIC |
| 11         | 70349062 | 70349063 | *         | -C           | 1        | DEL         | Hom        | 148.73  | 26       | NA       | ENSMUSG00000020828 | Pld2        | protein_coding   | UPSTREAM   |
| 11         | 70416609 | 70416610 | *         | -G           | 1        | DEL         | Hom        | 497.96  | 34       | NA       | ENSMUSG00000020827 | Mink1       | protein_coding   | INTRON     |

|    |           |             |            |    |     |     |         |    |    |                     |             |                  |            |
|----|-----------|-------------|------------|----|-----|-----|---------|----|----|---------------------|-------------|------------------|------------|
| 11 | 70593561  | 70593565 *  | -CTTC      | 4  | DEL | Hom | 355.05  | 21 | NA |                     |             |                  | INTERGENIC |
| 11 | 70869695  | 70869699 *  | -ATCT      | 4  | DEL | Hom | 526.97  | 25 | NA | ENSMUSG000000083171 | Gm12321     | pseudogene       | DOWNSTREAM |
| 11 | 70998894  | 70998898 *  | -AGAG      | 4  | DEL | Hom | 1085.96 | 27 | NA | ENSMUSG000000070390 | Nlrp1b      | protein_coding   | INTRON     |
| 11 | 71770449  | 71770453 *  | +TGTTG     | 4  | INS | Hom | 366.99  | 24 | NA |                     |             |                  | INTERGENIC |
| 11 | 73664384  | 73664385 *  | +A         | 1  | INS | Hom | 164.03  | 7  | NA | ENSMUSG000000064228 | Olfr393     | protein_coding   | UPSTREAM   |
| 11 | 74807449  | 74807450 *  | +A         | 1  | INS | Hom | 482.96  | 25 | NA | ENSMUSG000000038290 | Smg6        | protein_coding   | INTRON     |
| 11 | 75153381  | 75153382 *  | -T         | 1  | DEL | Hom | 109.05  | 8  | NA | ENSMUSG000000007051 | Rpa1        | protein_coding   | INTRON     |
| 11 | 75298320  | 75298324 *  | -TCTT      | 4  | DEL | Hom | 278.1   | 23 | NA | ENSMUSG000000020850 | Prpf8       | protein_coding   | UPSTREAM   |
| 11 | 75362054  | 75362055 *  | +T         | 1  | INS | Hom | 224.09  | 20 | NA | ENSMUSG000000038178 | Slc43a2     | protein_coding   | INTRON     |
| 11 | 75919212  | 75919216 *  | -AGCA      | 4  | DEL | Hom | 469.98  | 29 | NA | ENSMUSG000000017288 | Vps53       | protein_coding   | INTRON     |
| 11 | 75959481  | 75959482 *  | -A         | 1  | DEL | Hom | 154.16  | 11 | NA | ENSMUSG000000017286 | Glod4       | protein_coding   | INTRON     |
| 11 | 76215843  | 76215844 *  | -C         | 1  | DEL | Hom | 457.96  | 19 | NA | ENSMUSG000000020843 | Timm22      | protein_coding   | UPSTREAM   |
| 11 | 76526301  | 76526305 *  | -ATAG      | 4  | DEL | Hom | 310.1   | 23 | NA |                     |             |                  | INTERGENIC |
| 11 | 76926268  | 76926272 *  | -TCTA      | 4  | DEL | Hom | 449.98  | 31 | NA | ENSMUSG000000050944 | Efcab5      | protein_coding   | INTRON     |
| 11 | 77306131  | 77306132 *  | +A         | 1  | INS | Hom | 166.98  | 14 | NA | ENSMUSG000000091461 | AL607072.1  | lincRNA          | DOWNSTREAM |
| 11 | 77464220  | 77464224 *  | -TTGG      | 4  | DEL | Hom | 482.97  | 18 | NA |                     |             |                  | INTERGENIC |
| 11 | 77789400  | 77789402 *  | -AC        | 2  | DEL | Hom | 432.96  | 31 | NA | ENSMUSG000000000632 | Sez6        | protein_coding   | INTRON     |
| 11 | 77999502  | 77999506 *  | +AGAT      | 4  | INS | Hom | 1028.96 | 31 | NA | ENSMUSG000000064540 | Snord42a    | snRNA            | UPSTREAM   |
| 11 | 78062401  | 78062403 *  | -GT        | 2  | DEL | Hom | 501.99  | 33 | NA | ENSMUSG000000020664 | Sdf2        | protein_coding   | UPSTREAM   |
| 11 | 78685327  | 78685329 *  | +AA        | 2  | INS | Hom | 161.1   | 10 | NA |                     |             |                  | INTERGENIC |
| 11 | 79000415  | 79000417 *  | -TG        | 2  | DEL | Hom | 670.96  | 41 | NA |                     |             |                  | INTERGENIC |
| 11 | 79410147  | 79410151 *  | -GGAA      | 4  | DEL | Hom | 467.98  | 26 | NA | ENSMUSG000000017639 | Rab11fp4    | protein_coding   | INTRON     |
| 11 | 79632939  | 79632943 *  | -TCTT      | 4  | DEL | Hom | 178.73  | 12 | NA | ENSMUSG000000086474 | 9130204K15  | processed_transc | INTRON     |
| 11 | 79696431  | 79696433 *  | -AG        | 2  | DEL | Hom | 205.6   | 27 | NA |                     |             |                  | INTERGENIC |
| 11 | 79715750  | 79715754 *  | +AGAT      | 4  | INS | Hom | 818.96  | 25 | NA | ENSMUSG000000082252 | Gm11204     | pseudogene       | UPSTREAM   |
| 11 | 79802854  | 79802862 *  | +GTGTGTGT  | 8  | INS | Hom | 344.03  | 13 | NA | ENSMUSG000000017548 | Suz12       | protein_coding   | UPSTREAM   |
| 11 | 79825289  | 79825293 *  | -CTAT      | 4  | DEL | Hom | 420.99  | 23 | NA | ENSMUSG000000017548 | Suz12       | protein_coding   | INTRON     |
| 11 | 80138078  | 80138080 *  | -CA        | 2  | DEL | Hom | 198.05  | 24 | NA | ENSMUSG000000017692 | Rhbdl3      | protein_coding   | INTRON     |
| 11 | 81819340  | 81819344 *  | -TGTTG     | 4  | DEL | Hom | 340.99  | 27 | NA |                     |             |                  | INTERGENIC |
| 11 | 81970364  | 81970368 *  | +GTAT      | 4  | INS | Hom | 814.96  | 22 | NA |                     |             |                  | INTERGENIC |
| 11 | 82275003  | 82275004 *  | +C         | 1  | INS | Hom | 989.96  | 32 | NA |                     |             |                  | INTERGENIC |
| 11 | 82854557  | 82854565 *  | -TCTATCTA  | 8  | DEL | Hom | 479.1   | 17 | NA | ENSMUSG000000072621 | Sfn10-ps    | protein_coding   | UPSTREAM   |
| 11 | 83473408  | 83473409 *  | -T         | 1  | DEL | Hom | 153.6   | 23 | NA | ENSMUSG000000018930 | Ccl4        | protein_coding   | UPSTREAM   |
| 11 | 83612145  | 83612148 *  | +GTT       | 3  | INS | Hom | 923.96  | 24 | NA | ENSMUSG000000081342 | Gm11434     | pseudogene       | UPSTREAM   |
| 11 | 84108843  | 84108847 *  | -ATAG      | 4  | DEL | Hom | 132.93  | 13 | NA | ENSMUSG000000020532 | Acaca       | protein_coding   | INTRON     |
| 11 | 84766456  | 84766457 *  | +G         | 1  | INS | Hom | 705.96  | 23 | NA | ENSMUSG000000000805 | Car4        | protein_coding   | UPSTREAM   |
| 11 | 85141434  | 85141438 *  | +ATGT      | 4  | INS | Hom | 464.98  | 23 | NA | ENSMUSG000000020525 | Ppm1d       | protein_coding   | INTRON     |
| 11 | 85142107  | 85142111 *  | -ATCT      | 4  | DEL | Hom | 200.23  | 23 | NA | ENSMUSG000000020525 | Ppm1d       | protein_coding   | INTRON     |
| 11 | 85359116  | 85359117 *  | +T         | 1  | INS | Hom | 671.96  | 28 | NA | ENSMUSG000000059439 | Bcas3       | protein_coding   | INTRON     |
| 11 | 85609048  | 85609049 *  | -C         | 1  | DEL | Hom | 197.97  | 28 | NA | ENSMUSG000000059439 | Bcas3       | protein_coding   | INTRON     |
| 11 | 85813179  | 85813181 *  | +TT        | 2  | INS | Hom | 588.96  | 23 | NA |                     |             |                  | INTERGENIC |
| 11 | 86032789  | 86032790 *  | +A         | 1  | INS | Hom | 487.96  | 16 | NA | ENSMUSG000000085208 | 4632419122R | processed_transc | INTRON     |
| 11 | 86763615  | 86763616 *  | -T         | 1  | DEL | Hom | 137.09  | 30 | NA | ENSMUSG000000018427 | Ypel2       | protein_coding   | INTRON     |
| 11 | 86955794  | 86955795 *  | +T         | 1  | INS | Hom | 107.03  | 11 | NA | ENSMUSG000000018548 | Trim37      | protein_coding   | INTRON     |
| 11 | 88043015  | 88043019 *  | -ATCT      | 4  | DEL | Hom | 352     | 21 | NA |                     |             |                  | INTERGENIC |
| 11 | 88043178  | 88043182 *  | +CTAT      | 4  | INS | Hom | 262.03  | 10 | NA |                     |             |                  | INTERGENIC |
| 11 | 88082413  | 88082414 *  | +G         | 1  | INS | Hom | 428.96  | 20 | NA |                     |             |                  | INTERGENIC |
| 11 | 88099189  | 88099193 *  | -ATGA      | 4  | DEL | Hom | 270.1   | 25 | NA |                     |             |                  | INTERGENIC |
| 11 | 88295325  | 88295326 *  | +C         | 1  | INS | Hom | 62.48   | 12 | NA | ENSMUSG000000069769 | Msi2        | protein_coding   | INTRON     |
| 11 | 88711747  | 88711749 *  | +CA        | 2  | INS | Hom | 245.97  | 14 | NA | ENSMUSG000000018428 | Akap1       | protein_coding   | INTRON     |
| 11 | 89090018  | 89090022 *  | +ATTC      | 4  | INS | Hom | 480.98  | 32 | NA |                     |             |                  | INTERGENIC |
| 11 | 89755686  | 89755690 *  | +GATA      | 4  | INS | Hom | 423.99  | 22 | NA |                     |             |                  | INTERGENIC |
| 11 | 89788961  | 89788962 *  | +C         | 1  | INS | Hom | 381.97  | 10 | NA |                     |             |                  | INTERGENIC |
| 11 | 90084380  | 90084384 *  | +TCTA      | 4  | INS | Hom | 332.03  | 24 | NA | ENSMUSG000000003948 | Mmd         | protein_coding   | INTRON     |
| 11 | 90177428  | 90177432 *  | -ATCT      | 4  | DEL | Hom | 284.03  | 24 | NA |                     |             |                  | INTERGENIC |
| 11 | 90704953  | 90704959 *  | +CACACA    | 6  | INS | Hom | 576.98  | 31 | NA | ENSMUSG000000085940 | 4930405D11  | processed_transc | INTRON     |
| 11 | 91058759  | 91058760 *  | -G         | 1  | DEL | Hom | 191.1   | 7  | NA |                     |             |                  | INTERGENIC |
| 11 | 91234885  | 91234886 *  | +T         | 1  | INS | Hom | 319.99  | 9  | NA |                     |             |                  | INTERGENIC |
| 11 | 91813746  | 91813747 *  | +C         | 1  | INS | Hom | 486.96  | 15 | NA |                     |             |                  | INTERGENIC |
| 11 | 91881454  | 91881458 *  | -AGAA      | 4  | DEL | Hom | 371.07  | 15 | NA |                     |             |                  | INTERGENIC |
| 11 | 92879168  | 92879169 *  | +T         | 1  | INS | Hom | 221.96  | 17 | NA |                     |             |                  | INTERGENIC |
| 11 | 93035172  | 93035173 *  | -C         | 1  | DEL | Hom | 183.93  | 16 | NA | ENSMUSG000000056158 | Car10       | protein_coding   | INTRON     |
| 11 | 93268499  | 93268504 *  | -GTAGT     | 5  | DEL | Hom | 627.96  | 36 | NA | ENSMUSG000000056158 | Car10       | protein_coding   | INTRON     |
| 11 | 94040497  | 94040501 *  | -TCTG      | 4  | DEL | Hom | 445.96  | 26 | NA |                     |             |                  | INTERGENIC |
| 11 | 95516727  | 95516735 *  | +TGTGTGCA  | 8  | INS | Hom | 1111.97 | 31 | NA |                     |             |                  | INTERGENIC |
| 11 | 95941443  | 95941444 *  | +G         | 1  | INS | Hom | 242.03  | 11 | NA | ENSMUSG000000006057 | Atp5g1      | protein_coding   | UPSTREAM   |
| 11 | 96223826  | 96223830 *  | -AGGA      | 4  | DEL | Hom | 840.96  | 19 | NA | ENSMUSG000000018973 | Hoxb1       | protein_coding   | UPSTREAM   |
| 11 | 96439375  | 96439379 *  | +CCAC      | 4  | INS | Hom | 2301.96 | 42 | NA | ENSMUSG000000057058 | Skap1       | protein_coding   | INTRON     |
| 11 | 96595651  | 96595657 *  | -GAAAAG    | 6  | DEL | Hom | 395.98  | 24 | NA | ENSMUSG000000057058 | Skap1       | protein_coding   | INTRON     |
| 11 | 96962231  | 96962235 *  | +ATGG      | 4  | INS | Hom | 484.98  | 34 | NA | ENSMUSG000000084068 | Gm11573     | pseudogene       | DOWNSTREAM |
| 11 | 96983399  | 96983403 *  | -TCTG      | 4  | DEL | Hom | 911.96  | 43 | NA |                     |             |                  | INTERGENIC |
| 11 | 97274905  | 97274907 *  | +TG        | 2  | INS | Hom | 788.96  | 36 | NA | ENSMUSG000000049807 | Arhgap23    | protein_coding   | UPSTREAM   |
| 11 | 97762707  | 97762711 *  | +GGAT      | 4  | INS | Hom | 873.96  | 84 | NA |                     |             |                  | INTERGENIC |
| 11 | 98356329  | 98356331 *  | -TC        | 2  | DEL | Hom | 239.97  | 41 | NA | ENSMUSG000000018168 | Ikzf3       | protein_coding   | INTRON     |
| 11 | 99157362  | 99157367 *  | -CTTTC     | 5  | DEL | Hom | 270.1   | 27 | NA |                     |             |                  | INTERGENIC |
| 11 | 99296362  | 99296372 *  | +CACACACAC | 10 | INS | Hom | 1315.96 | 26 | NA | ENSMUSG000000035775 | Krt20       | protein_coding   | INTRON     |
| 11 | 99649692  | 99649696 *  | +TGGA      | 4  | INS | Hom | 402.99  | 22 | NA | ENSMUSG000000090037 | Krtap4-9    | pseudogene       | DOWNSTREAM |
| 11 | 99657836  | 99657840 *  | -CTTC      | 4  | DEL | Hom | 318.01  | 22 | NA | ENSMUSG000000078260 | Gm11569     | protein_coding   | DOWNSTREAM |
| 11 | 100170851 | 100170855 * | -TGAA      | 4  | DEL | Hom | 440.98  | 20 | NA |                     |             |                  | INTERGENIC |
| 11 | 100598895 | 100598896 * | -C         | 1  | DEL | Hom | 31.75   | 12 | NA | ENSMUSG000000019173 | Rab5c       | protein_coding   | INTRON     |
| 11 | 100897003 | 100897007 * | -TATC      | 4  | DEL | Hom | 682.96  | 30 | NA | ENSMUSG000000019302 | Atp6v0a1    | protein_coding   | INTRON     |
| 11 | 101027060 | 101027064 * | +TTCC      | 4  | INS | Hom | 358.96  | 20 | NA | ENSMUSG000000035172 | Plekhh3     | protein_coding   | INTRON     |
| 11 | 101338383 | 101338388 * | +AAAAG     | 5  | INS | Hom | 618.96  | 21 | NA | ENSMUSG000000080839 | Gm11625     | pseudogene       | DOWNSTREAM |
| 11 | 101741513 | 101741517 * | +ATGT      | 4  | INS | Hom | 926.96  | 56 | NA | ENSMUSG000000001493 | Meox1       | protein_coding   | INTRON     |
| 11 | 102129034 | 102129037 * | +CTC       | 3  | INS | Hom | 848.96  | 20 | NA | ENSMUSG000000034768 | Asb16       | protein_coding   | UPSTREAM   |
| 11 | 102194986 | 102194996 * | +AAACCAAAC | 10 | INS | Hom | 1367.96 | 29 | NA |                     |             |                  | INTERGENIC |
| 11 | 102281472 | 102281473 * | -T         | 1  | DEL | Hom | 627.96  | 31 | NA |                     |             |                  | INTERGENIC |
| 11 | 102346642 | 102346646 * | +CTAT      | 4  | INS | Hom | 515.97  | 22 | NA | ENSMUSG000000034621 | Gpatch8     | protein_coding   | INTRON     |
| 11 | 102652759 | 102652761 * | -TG        | 2  | DEL | Hom | 309.93  | 38 | NA |                     |             |                  | INTERGENIC |
| 11 | 103208748 | 103208752 * | +ACAC      | 4  | INS | Hom | 299.97  | 57 | NA | ENSMUSG000000034255 | Arhgap27    | protein_coding   | INTRON     |
| 11 | 103805447 | 103805451 * | -AGAT      | 4  | DEL | Hom | 283.1   | 17 | NA | ENSMUSG000000034187 | Nsf         | protein_coding   | INTRON     |
| 11 | 104477183 | 104477187 * | -TATC      | 4  | DEL | Hom | 111.03  | 25 | NA | ENSMUSG000000020689 | Itgb3       | protein_coding   | INTRON     |
| 11 | 104687272 | 104687275 * | -GAA       | 3  | DEL | Hom | 225.03  | 15 | NA |                     |             |                  | INTERGENIC |
| 11 | 105283098 | 105283102 * | -TCCA      | 4  | DEL | Hom | 592.96  | 34 | NA | ENSMUSG000000078627 | 40978       | protein_coding   | INTRON     |
| 11 | 107134486 | 107134490 * | +CAAC      | 4  | INS | Hom | 1308.96 | 47 | NA | ENSMUSG000000040430 | Pitpnc1     | protein_coding   | INTRON     |

|    |            |              |                         |    |     |     |         |     |    |                    |            |                  |            |
|----|------------|--------------|-------------------------|----|-----|-----|---------|-----|----|--------------------|------------|------------------|------------|
| 11 | 107145009  | 107145013 *  | +ATCC                   | 4  | INS | Hom | 1191.96 | 51  | NA | ENSMUSG00000040430 | Pitpnc1    | protein_coding   | INTRON     |
| 11 | 107936817  | 107936833 *  | -CAGACATCC <sup>A</sup> | 16 | DEL | Hom | 602.99  | 26  | NA | ENSMUSG00000050965 | Prkca      | protein_coding   | INTRON     |
| 11 | 108291735  | 108291736 *  | +T                      | 1  | INS | Hom | 287.37  | 24  | NA | ENSMUSG00000020728 | Cdc46      | protein_coding   | INTRON     |
| 11 | 108646294  | 108646295 *  | +T                      | 1  | INS | Hom | 425.96  | 16  | NA | ENSMUSG00000020728 | Cdc46      | protein_coding   | INTRON     |
| 11 | 109300681  | 109300683 *  | +GA                     | 2  | INS | Hom | 611.96  | 21  | NA | ENSMUSG00000020610 | Amz2       | protein_coding   | INTRON     |
| 11 | 109494401  | 109494405 *  | -ATCT                   | 4  | DEL | Hom | 304.1   | 33  | NA | ENSMUSG00000086733 | Gm11685    | processed_transc | INTRON     |
| 11 | 109956173  | 109956177 *  | +AAAT                   | 4  | INS | Hom | 250.23  | 12  | NA | ENSMUSG00000041828 | Abca8a     | protein_coding   | INTRON     |
| 11 | 110689103  | 110689107 *  | -ACAC                   | 4  | DEL | Hom | 236.29  | 24  | NA |                    |            |                  | INTERGENIC |
| 11 | 110845331  | 110845332 *  | +C                      | 1  | INS | Hom | 339.98  | 12  | NA | ENSMUSG00000051497 | Kcnj16     | protein_coding   | INTRON     |
| 11 | 110849465  | 110849471 *  | +ACACAC                 | 6  | INS | Hom | 1106.96 | 32  | NA | ENSMUSG00000051497 | Kcnj16     | protein_coding   | INTRON     |
| 11 | 111414735  | 111414737 *  | -GA                     | 2  | DEL | Hom | 70.42   | 16  | NA |                    |            |                  | INTERGENIC |
| 11 | 111642294  | 111642296 *  | -GG                     | 2  | DEL | Hom | 204.23  | 8   | NA |                    |            |                  | INTERGENIC |
| 11 | 112077462  | 112077463 *  | -A                      | 1  | DEL | Hom | 158.23  | 7   | NA |                    |            |                  | INTERGENIC |
| 11 | 112231672  | 112231674 *  | -TG                     | 2  | DEL | Hom | 359.96  | 29  | NA |                    |            |                  | INTERGENIC |
| 11 | 112516261  | 112516266 *  | -TTGTT                  | 5  | DEL | Hom | 443.99  | 31  | NA |                    |            |                  | INTERGENIC |
| 11 | 112555908  | 112555910 *  | +AC                     | 2  | INS | Hom | 758.99  | 32  | NA | ENSMUSG00000041674 | BC006965   | lincRNA          | INTRON     |
| 11 | 113064653  | 113064654 *  | +T                      | 1  | INS | Hom | 172.98  | 15  | NA | ENSMUSG00000085421 | 4732490B19 | processed_transc | EXON       |
| 11 | 113172733  | 113172737 *  | -CAC                    | 4  | DEL | Hom | 381.98  | 29  | NA | ENSMUSG00000041654 | Slc39a11   | protein_coding   | INTRON     |
| 11 | 113264775  | 113264778 *  | -GTT                    | 3  | DEL | Hom | 557.96  | 15  | NA | ENSMUSG00000041654 | Slc39a11   | protein_coding   | INTRON     |
| 11 | 113319762  | 113319773 *  | +CCACCCACCC             | 11 | INS | Hom | 1327.96 | 22  | NA | ENSMUSG00000041654 | Slc39a11   | protein_coding   | INTRON     |
| 11 | 1133510714 | 1133510715 * | +A                      | 1  | INS | Hom | 535.96  | 25  | NA | ENSMUSG00000041654 | Slc39a11   | protein_coding   | INTRON     |
| 11 | 113863597  | 113863605 *  | +TCTATCTA               | 8  | INS | Hom | 1148.96 | 26  | NA | ENSMUSG00000041592 | Sdk2       | protein_coding   | INTRON     |
| 11 | 115841777  | 115841782 *  | -AAAGA                  | 5  | DEL | Hom | 304.99  | 17  | NA | ENSMUSG00000020758 | Itgb4      | protein_coding   | INTRON     |
| 11 | 116234009  | 116234013 *  | -CAC                    | 4  | DEL | Hom | 130.93  | 15  | NA | ENSMUSG00000052949 | Rnf157     | protein_coding   | INTRON     |
| 11 | 116877501  | 116877505 *  | +GATG                   | 4  | INS | Hom | 724.96  | 38  | NA |                    |            |                  | INTERGENIC |
| 11 | 117417848  | 117417851 *  | -TTG                    | 3  | DEL | Hom | 410.97  | 48  | NA |                    |            |                  | INTERGENIC |
| 11 | 117487508  | 117487509 *  | -G                      | 1  | DEL | Hom | 196.99  | 17  | NA |                    |            |                  | INTERGENIC |
| 11 | 117812100  | 117812102 *  | +GC                     | 2  | INS | Hom | 454.98  | 11  | NA |                    |            |                  | INTERGENIC |
| 11 | 117975037  | 117975039 *  | -CA                     | 2  | DEL | Hom | 1368.96 | 37  | NA | ENSMUSG00000033987 | Dnahc17    | protein_coding   | INTRON     |
| 11 | 118100325  | 118100327 *  | +AG                     | 2  | INS | Hom | 356.23  | 30  | NA | ENSMUSG00000017132 | Cyth1      | protein_coding   | INTRON     |
| 11 | 118302942  | 118302945 *  | -TGC                    | 3  | DEL | Hom | 5493    | 113 | NA | ENSMUSG00000017446 | C1qtnf1    | protein_coding   | INTRON     |
| 11 | 118354789  | 118354790 *  | +A                      | 1  | INS | Hom | 208.98  | 11  | NA | ENSMUSG00000025576 | D11Bwg0517 | protein_coding   | INTRON     |
| 11 | 118356862  | 118356866 *  | -CCTT                   | 4  | DEL | Hom | 464.96  | 40  | NA | ENSMUSG00000025576 | D11Bwg0517 | protein_coding   | INTRON     |
| 11 | 118562726  | 118562730 *  | -GGGA                   | 4  | DEL | Hom | 470.97  | 17  | NA | ENSMUSG00000025576 | D11Bwg0517 | protein_coding   | INTRON     |
| 11 | 118674767  | 118674768 *  | +G                      | 1  | INS | Hom | 903.96  | 22  | NA | ENSMUSG00000025576 | D11Bwg0517 | protein_coding   | INTRON     |
| 11 | 118679262  | 118679266 *  | +GATA                   | 4  | INS | Hom | 385.99  | 23  | NA | ENSMUSG00000025576 | D11Bwg0517 | protein_coding   | INTRON     |
| 11 | 118748600  | 118748604 *  | +ATAC                   | 4  | INS | Hom | 780.96  | 41  | NA | ENSMUSG00000025576 | D11Bwg0517 | protein_coding   | INTRON     |
| 11 | 118817657  | 118817658 *  | +C                      | 1  | INS | Hom | 775.96  | 33  | NA |                    |            |                  | INTERGENIC |
| 11 | 119094805  | 119094809 *  | +TTGG                   | 4  | INS | Hom | 625.96  | 30  | NA | ENSMUSG00000039963 | Ccdc40     | protein_coding   | INTRON     |
| 11 | 120063905  | 120063913 *  | -GATAGATA               | 8  | DEL | Hom | 638.97  | 24  | NA |                    |            |                  | INTERGENIC |
| 11 | 120353578  | 120353579 *  | +C                      | 1  | INS | Hom | 496.96  | 16  | NA | ENSMUSG00000025792 | Slc25a10   | protein_coding   | INTRON     |
| 11 | 120574195  | 120574196 *  | -C                      | 1  | DEL | Hom | 39.48   | 17  | NA | ENSMUSG00000025145 | Lrrc45     | protein_coding   | UPSTREAM   |
| 11 | 121256614  | 121256615 *  | -G                      | 1  | DEL | Hom | 103.23  | 16  | NA |                    |            |                  | INTERGENIC |
| 11 | 121338637  | 121338638 *  | +C                      | 1  | INS | Hom | 157.03  | 16  | NA | ENSMUSG00000039230 | Tbcd       | protein_coding   | INTRON     |
| 11 | 121724800  | 121724802 *  | -CA                     | 2  | DEL | Hom | 235.99  | 20  | NA | ENSMUSG00000084401 | Gm12586    | pseudogene       | DOWNSTREAM |



Structural variants

| Chromosome | Start     | Finish    | Svsize | Reference | Change | Change_type | Homozygous | Quality | Coverage | Warnings | Gene_ID            | Gene_name | Bio_type       | Exon_ID    |
|------------|-----------|-----------|--------|-----------|--------|-------------|------------|---------|----------|----------|--------------------|-----------|----------------|------------|
| 11         | 31245663  | 31246147  |        | 484 NA    | NA     | Interval    | NA         |         | 0        | 0 NA     |                    |           |                | INTERGENIC |
| 11         | 32022724  | 32022917  |        | 193 NA    | NA     | Interval    | NA         |         | 0        | 0 NA     |                    |           |                | INTERGENIC |
| 11         | 32385719  | 32385721  |        | 2 NA      | NA     | Interval    | NA         |         | 0        | 0 NA     | ENSMUSG00000044949 | Ubtcd2    | protein_coding | INTRON     |
| 11         | 36442060  | 36442062  |        | 2 NA      | NA     | Interval    | NA         |         | 0        | 0 NA     | ENSMUSG00000049336 | Odz2      | protein_coding | INTRON     |
| 11         | 36612388  | 36612402  |        | 14 NA     | NA     | Interval    | NA         |         | 0        | 0 NA     | ENSMUSG00000049336 | Odz2      | protein_coding | INTRON     |
| 11         | 44162255  | 44162257  |        | 2 NA      | NA     | Interval    | NA         |         | 0        | 0 NA     |                    |           |                | INTERGENIC |
| 11         | 52273086  | 52273088  |        | 2 NA      | NA     | Interval    | NA         |         | 0        | 0 NA     |                    |           |                | INTERGENIC |
| 11         | 57000397  | 57000399  |        | 2 NA      | NA     | Interval    | NA         |         | 0        | 0 NA     | ENSMUSG00000020524 | Gria1     | protein_coding | INTRON     |
| 11         | 57000402  | 57000404  |        | 2 NA      | NA     | Interval    | NA         |         | 0        | 0 NA     | ENSMUSG00000020524 | Gria1     | protein_coding | INTRON     |
| 11         | 71039987  | 71039989  |        | 2 NA      | NA     | Interval    | NA         |         | 0        | 0 NA     | ENSMUSG00000070390 | Nlrp1b    | protein_coding | INTRON     |
| 11         | 79723116  | 79723120  |        | 4 NA      | NA     | Interval    | NA         |         | 0        | 0 NA     | ENSMUSG00000082252 | Gm11204   | pseudogene     | DOWNSTREAM |
| 11         | 79809573  | 79809676  |        | 103 NA    | NA     | Interval    | NA         |         | 0        | 0 NA     | ENSMUSG00000017548 | Suz12     | protein_coding | INTRON     |
| 11         | 80381796  | 80381798  |        | 2 NA      | NA     | Interval    | NA         |         | 0        | 0 NA     | ENSMUSG00000035441 | Myo1d     | protein_coding | INTRON     |
| 11         | 80733734  | 80733879  |        | 145 NA    | NA     | Interval    | NA         |         | 0        | 0 NA     | ENSMUSG00000020704 | Accn1     | protein_coding | INTRON     |
| 11         | 83088917  | 83088919  |        | 2 NA      | NA     | Interval    | NA         |         | 0        | 0 NA     | ENSMUSG00000082101 | Sifn14-ps | pseudogene     | EXON       |
| 11         | 83088917  | 83088919  |        | 2 NA      | NA     | Interval    | NA         |         | 0        | 0 NA     | ENSMUSG00000082101 | Sifn14-ps | pseudogene     | DOWNSTREAM |
| 11         | 88119979  | 88120232  |        | 253 NA    | NA     | Interval    | NA         |         | 0        | 0 NA     |                    |           |                | INTERGENIC |
| 11         | 88832157  | 88832159  |        | 2 NA      | NA     | Interval    | NA         |         | 0        | 0 NA     | ENSMUSG00000033983 | Coil      | protein_coding | INTRON     |
| 11         | 88832157  | 88832159  |        | 2 NA      | NA     | Interval    | NA         |         | 0        | 0 NA     | ENSMUSG00000033983 | Coil      | protein_coding | UPSTREAM   |
| 11         | 90156751  | 90156753  |        | 2 NA      | NA     | Interval    | NA         |         | 0        | 0 NA     |                    |           |                | INTERGENIC |
| 11         | 91590387  | 91590389  |        | 2 NA      | NA     | Interval    | NA         |         | 0        | 0 NA     |                    |           |                | INTERGENIC |
| 11         | 104906404 | 104906618 |        | 214 NA    | NA     | Interval    | NA         |         | 0        | 0 NA     |                    |           |                | INTERGENIC |
| 11         | 107967159 | 107973827 |        | 6668 NA   | NA     | Interval    | NA         |         | 0        | 0 NA     | ENSMUSG00000050965 | Prkca     | protein_coding | INTRON     |
| 11         | 107967186 | 107973850 |        | 6664 NA   | NA     | Interval    | NA         |         | 0        | 0 NA     | ENSMUSG00000050965 | Prkca     | protein_coding | INTRON     |
| 11         | 110083360 | 110083362 |        | 2 NA      | NA     | Interval    | NA         |         | 0        | 0 NA     | ENSMUSG00000044749 | Abca6     | protein_coding | INTRON     |
| 11         | 112699097 | 112699099 |        | 2 NA      | NA     | Interval    | NA         |         | 0        | 0 NA     |                    |           |                | INTERGENIC |
| 11         | 114800287 | 114800289 |        | 2 NA      | NA     | Interval    | NA         |         | 0        | 0 NA     | ENSMUSG00000063193 | Cd300lb   | protein_coding | UPSTREAM   |
| 11         | 117989080 | 117989082 |        | 2 NA      | NA     | Interval    | NA         |         | 0        | 0 NA     | ENSMUSG00000033987 | Dnahc17   | protein_coding | INTRON     |
| 11         | 117989080 | 117989082 |        | 2 NA      | NA     | Interval    | NA         |         | 0        | 0 NA     | ENSMUSG00000033987 | Dnahc17   | protein_coding | UPSTREAM   |
| 11         | 117989080 | 117989082 |        | 2 NA      | NA     | Interval    | NA         |         | 0        | 0 NA     | ENSMUSG00000017132 | Cytl1     | protein_coding | DOWNSTREAM |
| 11         | 119560384 | 119566877 |        | 6493 NA   | NA     | Interval    | NA         |         | 0        | 0 NA     | ENSMUSG00000025583 | Rptor     | protein_coding | INTRON     |
| 11         | 119674456 | 119674460 |        | 4 NA      | NA     | Interval    | NA         |         | 0        | 0 NA     | ENSMUSG00000025583 | Rptor     | protein_coding | INTRON     |
| 11         | 121794737 | 121794739 |        | 2 NA      | NA     | Interval    | NA         |         | 0        | 0 NA     |                    |           |                | INTERGENIC |
| 11         | 121798837 | 121798839 |        | 2 NA      | NA     | Interval    | NA         |         | 0        | 0 NA     | ENSMUSG00000078564 | Gm9631    | protein_coding | DOWNSTREAM |
| 11         | 121830166 | 121830168 |        | 2 NA      | NA     | Interval    | NA         |         | 0        | 0 NA     | ENSMUSG00000082831 | Gm12591   | pseudogene     | EXON       |

|                    |      |   |   |        |      |   |   |                  |             |       |         |         |        |
|--------------------|------|---|---|--------|------|---|---|------------------|-------------|-------|---------|---------|--------|
| ENSMUST0000033207  | 549  | A | V | P20239 | 549  | A | V | benign           | neutral     | 0     | 1       | 1       | 0.575  |
| ENSMUST0000033154  | 364  | R | W | Q07832 | 364  | R | W | possiblydamaging | deleterious | 0.849 | 0.0674  | 0.834   | 0.0988 |
| ENSMUST0000062451  | 1951 | T | K | F8WIM6 | 1951 | T | K | benign           | neutral     | 0     | 1       | 1       | 0.575  |
| ENSMUST00000171124 | 1948 | T | K | E9Q471 | 1948 | T | K | benign           | neutral     | 0     | 1       | 1       | 0.575  |
| ENSMUST0000026590  | 1166 | Y | C | E9QAR7 | 1166 | Y | C | benign           | neutral     | 0     | 1       | 1       | 0.575  |
| ENSMUST00000151376 | 41   | Q | H | F6VLK5 | 41   | Q | H | benign           | neutral     | 0     | 1       | 1       | 0.575  |
| ENSMUST00000115743 | 184  | V | F | D3YZD5 | 184  | V | F | benign           | neutral     | 0     | 1       | 1       | 0.575  |
| ENSMUST00000099051 | 64   | L | S | F6QDW5 | 64   | L | S | benign           | neutral     | 0     | 1       | 1       | 0.575  |
| ENSMUST00000099051 | 66   | T | S | F6QDW5 | 66   | T | S | benign           | neutral     | 0     | 1       | 1       | 0.575  |
| ENSMUST00000099051 | 67   | A | G | F6QDW5 | 67   | A | G | benign           | neutral     | 0     | 1       | 1       | 0.575  |
| ENSMUST00000099050 | 6    | N | H | D3Z1I5 | 6    | N | H | benign           | neutral     | 0     | 1       | 1       | 0.575  |
| ENSMUST00000099050 | 84   | L | M | D3Z1I5 | 84   | L | M | benign           | neutral     | 0.001 | 0.852   | 0.994   | 0.514  |
| ENSMUST00000099050 | 152  | T | K | D3Z1I5 | 152  | T | K | benign           | neutral     | 0     | 1       | 1       | 0.575  |
| ENSMUST00000099049 | 73   | T | K | D3Z1I6 | 73   | T | K | benign           | neutral     | 0     | 1       | 1       | 0.575  |
| ENSMUST00000099046 | 76   | T | S | D3Z1I7 | 76   | T | S | benign           | neutral     | 0     | 1       | 1       | 0.575  |
| ENSMUST00000099042 | 23   | R | P | F6QHK0 | 23   | R | P | benign           | neutral     | 0     | 1       | 1       | 0.575  |
| ENSMUST00000099042 | 25   | L | F | F6QHK0 | 25   | L | F | benign           | neutral     | 0     | 1       | 1       | 0.575  |
| ENSMUST00000099042 | 73   | T | S | F6QHK0 | 73   | T | S | benign           | neutral     | 0     | 1       | 1       | 0.575  |
| ENSMUST00000008573 | 85   | V | L | Q9JJC9 | 85   | V | L | probablydamaging | deleterious | 0.978 | 0.0417  | 0.756   | 0.0695 |
| ENSMUST00000054925 | 305  | H | R | Q8BI38 | 305  | H | R | benign           | neutral     | 0     | 1       | 1       | 0.575  |
| ENSMUST00000120329 | 305  | H | R | Q3UW55 | 305  | H | R | benign           | neutral     | 0     | 1       | 1       | 0.575  |
| ENSMUST00000111635 | 970  | Q | P | E9QQ93 | 970  | Q | P | benign           | neutral     | 0     | 1       | 1       | 0.575  |
| ENSMUST00000047687 | 120  | F | V | E9PYV0 | 120  | F | V | benign           | neutral     | 0     | 1       | 1       | 0.575  |
| ENSMUST00000051446 | 1715 | L | P | Q69ZK6 | 1715 | L | P | benign           | neutral     | 0     | 1       | 1       | 0.575  |
| ENSMUST00000095573 | 1715 | L | P | E9QPL3 | 1715 | L | P | benign           | neutral     | 0     | 1       | 1       | 0.575  |
| ENSMUST00000165834 | 316  | N | S | E9Q1L0 | 316  | N | S | benign           | neutral     | 0.164 | 0.132   | 0.92    | 0.162  |
| ENSMUST00000048621 | 132  | I | T | Q9D220 | 132  | I | T | benign           | neutral     | 0.011 | 0.222   | 0.959   | 0.239  |
| ENSMUST00000101649 | 1079 | E | G | Q5NBZ9 | 1079 | E | G | benign           | neutral     | 0     | 1       | 1       | 0.575  |
| ENSMUST00000101655 | 1099 | E | G | E9QJT8 | 1099 | E | G | benign           | neutral     | 0     | 1       | 1       | 0.575  |
| ENSMUST00000081318 | 1110 | E | G | Q3UZYO | 1110 | E | G | benign           | neutral     | 0     | 1       | 1       | 0.575  |
| ENSMUST00000140846 | 1018 | E | G | E9Q799 | 1018 | E | G | benign           | neutral     | 0     | 1       | 1       | 0.575  |
| ENSMUST00000153425 | 1068 | E | G | E9Q8V3 | 1068 | E | G | benign           | neutral     | 0     | 1       | 1       | 0.575  |
| ENSMUST00000101649 | 991  | T | M | Q5NBZ9 | 991  | T | M | benign           | neutral     | 0.001 | 0.852   | 0.994   | 0.514  |
| ENSMUST00000101655 | 1011 | T | M | E9QJT8 | 1011 | T | M | benign           | neutral     | 0.001 | 0.852   | 0.994   | 0.514  |
| ENSMUST00000081318 | 1022 | T | M | Q3UZYO | 1022 | T | M | benign           | neutral     | 0     | 1       | 1       | 0.575  |
| ENSMUST00000140846 | 930  | T | M | E9Q799 | 930  | T | M | benign           | neutral     | 0     | 1       | 1       | 0.575  |
| ENSMUST00000153425 | 980  | T | M | E9Q8V3 | 980  | T | M | benign           | neutral     | 0     | 1       | 1       | 0.575  |
| ENSMUST00000101649 | 792  | L | F | Q5NBZ9 | 792  | L | F | benign           | neutral     | 0.001 | 0.852   | 0.994   | 0.514  |
| ENSMUST00000101655 | 823  | L | F | E9QJT8 | 823  | L | F | benign           | neutral     | 0.001 | 0.852   | 0.994   | 0.514  |
| ENSMUST00000081318 | 823  | L | F | Q3UZYO | 823  | L | F | benign           | neutral     | 0     | 1       | 1       | 0.575  |
| ENSMUST00000093407 | 563  | L | F | H7BX67 | 563  | L | F | benign           | neutral     | 0.005 | 0.26    | 0.968   | 0.267  |
| ENSMUST00000140846 | 742  | L | F | E9Q799 | 742  | L | F | benign           | neutral     | 0     | 1       | 1       | 0.575  |
| ENSMUST00000066391 | 791  | L | F | Q3UZYO | 791  | L | F | probablydamaging | deleterious | 0.999 | 0.00574 | 0.136   | 0.0192 |
| ENSMUST00000153425 | 792  | L | F | E9Q8V3 | 792  | L | F | benign           | neutral     | 0     | 1       | 1       | 0.575  |
| ENSMUST00000101649 | 765  | S | G | Q5NBZ9 | 765  | S | G | benign           | neutral     | 0.011 | 0.222   | 0.959   | 0.239  |
| ENSMUST00000101655 | 796  | S | G | E9QJT8 | 796  | S | G | benign           | neutral     | 0.006 | 0.253   | 0.967   | 0.262  |
| ENSMUST00000081318 | 796  | S | G | Q3UZYO | 796  | S | G | benign           | neutral     | 0.006 | 0.253   | 0.967   | 0.262  |
| ENSMUST00000093407 | 536  | S | G | H7BX67 | 536  | S | G | benign           | neutral     | 0.014 | 0.212   | 0.956   | 0.231  |
| ENSMUST00000140846 | 715  | S | G | E9Q799 | 715  | S | G | benign           | neutral     | 0     | 1       | 1       | 0.575  |
| ENSMUST00000153425 | 765  | S | G | E9Q8V3 | 765  | S | G | benign           | neutral     | 0.006 | 0.253   | 0.967   | 0.262  |
| ENSMUST00000101649 | 728  | H | R | Q5NBZ9 | 728  | H | R | benign           | neutral     | 0     | 1       | 1       | 0.575  |
| ENSMUST00000101655 | 759  | H | R | E9QJT8 | 759  | H | R | benign           | neutral     | 0     | 1       | 1       | 0.575  |
| ENSMUST00000081318 | 759  | H | R | Q3UZYO | 759  | H | R | benign           | neutral     | 0     | 1       | 1       | 0.575  |
| ENSMUST00000093407 | 499  | H | R | H7BX67 | 499  | H | R | benign           | neutral     | 0.001 | 0.852   | 0.994   | 0.514  |
| ENSMUST00000140846 | 678  | H | R | E9Q799 | 678  | H | R | benign           | neutral     | 0     | 1       | 1       | 0.575  |
| ENSMUST00000066391 | 727  | H | R | Q3UZYO | 727  | R | H | probablydamaging | deleterious | 1     | 0.00026 | 0.00018 | 0.0109 |
| ENSMUST00000153425 | 728  | H | R | E9Q8V3 | 728  | H | R | benign           | neutral     | 0     | 1       | 1       | 0.575  |
| ENSMUST00000101649 | 719  | Q | R | Q5NBZ9 | 719  | Q | R | benign           | neutral     | 0.011 | 0.222   | 0.959   | 0.239  |
| ENSMUST00000101655 | 750  | Q | R | E9QJT8 | 750  | Q | R | benign           | neutral     | 0.053 | 0.164   | 0.94    | 0.191  |
| ENSMUST00000081318 | 750  | Q | R | Q3UZYO | 750  | Q | R | benign           | neutral     | 0.053 | 0.164   | 0.94    | 0.191  |
| ENSMUST00000093407 | 490  | Q | R | H7BX67 | 490  | Q | R | benign           | neutral     | 0.014 | 0.212   | 0.956   | 0.231  |
| ENSMUST00000140846 | 669  | Q | R | E9Q799 | 669  | Q | R | benign           | neutral     | 0     | 1       | 1       | 0.575  |
| ENSMUST00000153425 | 719  | Q | R | E9Q8V3 | 719  | Q | R | benign           | neutral     | 0.053 | 0.164   | 0.94    | 0.191  |
| ENSMUST00000101649 | 680  | R | Q | Q5NBZ9 | 680  | R | Q | possiblydamaging | deleterious | 0.754 | 0.0773  | 0.852   | 0.109  |
| ENSMUST00000101655 | 711  | R | Q | E9QJT8 | 711  | R | Q | possiblydamaging | deleterious | 0.786 | 0.0742  | 0.847   | 0.106  |
| ENSMUST00000081318 | 711  | R | Q | Q3UZYO | 711  | R | Q | possiblydamaging | deleterious | 0.867 | 0.066   | 0.828   | 0.0974 |
| ENSMUST00000093407 | 451  | R | Q | H7BX67 | 451  | R | Q | possiblydamaging | deleterious | 0.943 | 0.0548  | 0.797   | 0.0852 |

|                    |     |   |   |        |     |   |   |                  |             |       |         |         |        |
|--------------------|-----|---|---|--------|-----|---|---|------------------|-------------|-------|---------|---------|--------|
| ENSMUST00000140846 | 630 | R | Q | E9Q799 | 630 | R | Q | probablydamaging | deleterious | 0.958 | 0.0492  | 0.783   | 0.0785 |
| ENSMUST00000153425 | 680 | R | Q | E9Q8V3 | 680 | R | Q | possiblydamaging | deleterious | 0.867 | 0.066   | 0.828   | 0.0974 |
| ENSMUST00000101649 | 667 | V | I | Q5NBZ9 | 667 | V | I | possiblydamaging | neutral     | 0.492 | 0.0975  | 0.885   | 0.13   |
| ENSMUST00000101655 | 698 | V | I | E9QJT8 | 698 | V | I | benign           | neutral     | 0.204 | 0.124   | 0.915   | 0.156  |
| ENSMUST00000081318 | 698 | V | I | Q3UZYO | 698 | V | I | benign           | neutral     | 0.204 | 0.124   | 0.915   | 0.156  |
| ENSMUST00000093407 | 438 | V | I | H7BX67 | 438 | V | I | benign           | neutral     | 0.225 | 0.121   | 0.913   | 0.152  |
| ENSMUST00000140846 | 617 | V | I | E9Q799 | 617 | V | I | possiblydamaging | deleterious | 0.805 | 0.0722  | 0.842   | 0.104  |
| ENSMUST00000153425 | 667 | V | I | E9Q8V3 | 667 | V | I | benign           | neutral     | 0.204 | 0.124   | 0.915   | 0.156  |
| ENSMUST00000101649 | 587 | A | V | Q5NBZ9 | 587 | A | V | probablydamaging | deleterious | 1     | 0.00026 | 0.00018 | 0.0109 |
| ENSMUST00000101655 | 618 | A | V | E9QJT8 | 618 | A | V | probablydamaging | deleterious | 1     | 0.00026 | 0.00018 | 0.0109 |
| ENSMUST00000081318 | 618 | A | V | Q3UZYO | 618 | A | V | probablydamaging | deleterious | 1     | 0.00026 | 0.00018 | 0.0109 |
| ENSMUST00000140846 | 537 | A | V | E9Q799 | 537 | A | V | probablydamaging | deleterious | 0.991 | 0.0326  | 0.711   | 0.0584 |
| ENSMUST00000153425 | 587 | A | V | E9Q8V3 | 587 | A | V | probablydamaging | deleterious | 1     | 0.00026 | 0.00018 | 0.0109 |
| ENSMUST00000101649 | 565 | R | W | Q5NBZ9 | 565 | R | W | benign           | neutral     | 0     | 1       | 1       | 0.575  |
| ENSMUST00000101655 | 596 | R | W | E9QJT8 | 596 | R | W | benign           | neutral     | 0     | 1       | 1       | 0.575  |
| ENSMUST00000081318 | 596 | R | W | Q3UZYO | 596 | R | W | benign           | neutral     | 0     | 1       | 1       | 0.575  |
| ENSMUST00000093407 | 368 | R | W | H7BX67 | 368 | R | W | benign           | neutral     | 0.006 | 0.253   | 0.967   | 0.262  |
| ENSMUST00000140846 | 515 | R | W | E9Q799 | 515 | R | W | benign           | neutral     | 0     | 1       | 1       | 0.575  |
| ENSMUST00000066391 | 596 | R | W | Q3UZYO | 596 | R | W | benign           | neutral     | 0     | 1       | 1       | 0.575  |
| ENSMUST00000153425 | 565 | R | W | E9Q8V3 | 565 | R | W | benign           | neutral     | 0     | 1       | 1       | 0.575  |
| ENSMUST00000101649 | 561 | Q | R | Q5NBZ9 | 561 | Q | R | benign           | neutral     | 0     | 1       | 1       | 0.575  |
| ENSMUST00000101655 | 592 | Q | R | E9QJT8 | 592 | Q | R | benign           | neutral     | 0     | 1       | 1       | 0.575  |
| ENSMUST00000081318 | 592 | Q | R | Q3UZYO | 592 | Q | R | benign           | neutral     | 0     | 1       | 1       | 0.575  |
| ENSMUST00000093407 | 364 | Q | R | H7BX67 | 364 | Q | R | benign           | neutral     | 0.006 | 0.253   | 0.967   | 0.262  |
| ENSMUST00000140846 | 511 | Q | R | E9Q799 | 511 | Q | R | benign           | neutral     | 0     | 1       | 1       | 0.575  |
| ENSMUST00000066391 | 592 | Q | R | Q3UZYO | 592 | Q | R | benign           | neutral     | 0     | 1       | 1       | 0.575  |
| ENSMUST00000153425 | 561 | Q | R | E9Q8V3 | 561 | Q | R | benign           | neutral     | 0     | 1       | 1       | 0.575  |
| ENSMUST00000101649 | 413 | Q | R | Q5NBZ9 | 413 | Q | R | benign           | neutral     | 0     | 1       | 1       | 0.575  |
| ENSMUST00000101655 | 444 | Q | R | E9QJT8 | 444 | Q | R | benign           | neutral     | 0     | 1       | 1       | 0.575  |
| ENSMUST00000081318 | 444 | Q | R | Q3UZYO | 444 | Q | R | benign           | neutral     | 0     | 1       | 1       | 0.575  |
| ENSMUST00000093407 | 216 | Q | R | H7BX67 | 216 | Q | R | benign           | neutral     | 0.001 | 0.852   | 0.994   | 0.514  |
| ENSMUST00000140846 | 363 | Q | R | E9Q799 | 363 | Q | R | benign           | neutral     | 0     | 1       | 1       | 0.575  |
| ENSMUST00000066391 | 444 | Q | R | Q3UZYO | 444 | Q | R | benign           | neutral     | 0     | 1       | 1       | 0.575  |
| ENSMUST00000153425 | 413 | Q | R | E9Q8V3 | 413 | Q | R | benign           | neutral     | 0     | 1       | 1       | 0.575  |
| ENSMUST00000101649 | 403 | R | K | Q5NBZ9 | 403 | R | K | benign           | neutral     | 0.035 | 0.177   | 0.945   | 0.202  |
| ENSMUST00000101655 | 434 | R | K | E9QJT8 | 434 | R | K | benign           | neutral     | 0.009 | 0.233   | 0.961   | 0.247  |
| ENSMUST00000081318 | 434 | R | K | Q3UZYO | 434 | R | K | benign           | neutral     | 0.009 | 0.233   | 0.961   | 0.247  |
| ENSMUST00000093407 | 206 | R | K | H7BX67 | 206 | R | K | benign           | neutral     | 0.017 | 0.205   | 0.954   | 0.225  |
| ENSMUST00000140846 | 353 | R | K | E9Q799 | 353 | R | K | benign           | neutral     | 0.001 | 0.852   | 0.994   | 0.514  |
| ENSMUST00000066391 | 434 | R | K | Q3UZYO | 434 | R | K | benign           | neutral     | 0.009 | 0.233   | 0.961   | 0.247  |
| ENSMUST00000153425 | 403 | R | K | E9Q8V3 | 403 | R | K | benign           | neutral     | 0.016 | 0.207   | 0.955   | 0.227  |
| ENSMUST00000101649 | 393 | Y | H | Q5NBZ9 | 393 | Y | H | benign           | neutral     | 0.056 | 0.163   | 0.939   | 0.19   |
| ENSMUST00000101655 | 424 | Y | H | E9QJT8 | 424 | Y | H | benign           | neutral     | 0.032 | 0.18    | 0.946   | 0.205  |
| ENSMUST00000081318 | 424 | Y | H | Q3UZYO | 424 | Y | H | benign           | neutral     | 0.032 | 0.18    | 0.946   | 0.205  |
| ENSMUST00000140846 | 343 | Y | H | E9Q799 | 343 | Y | H | probablydamaging | deleterious | 0.993 | 0.0301  | 0.696   | 0.0553 |
| ENSMUST00000066391 | 424 | Y | H | Q3UZYO | 424 | Y | H | benign           | neutral     | 0.032 | 0.18    | 0.946   | 0.205  |
| ENSMUST00000153425 | 393 | Y | H | E9Q8V3 | 393 | Y | H | benign           | neutral     | 0.056 | 0.163   | 0.939   | 0.19   |
| ENSMUST00000101649 | 381 | V | E | Q5NBZ9 | 381 | V | E | benign           | neutral     | 0.002 | 0.704   | 0.987   | 0.452  |
| ENSMUST00000101655 | 412 | V | E | E9QJT8 | 412 | V | E | benign           | neutral     | 0.002 | 0.704   | 0.987   | 0.452  |
| ENSMUST00000081318 | 412 | V | E | Q3UZYO | 412 | V | E | benign           | neutral     | 0.001 | 0.852   | 0.994   | 0.514  |
| ENSMUST00000140846 | 331 | V | E | E9Q799 | 331 | V | E | benign           | neutral     | 0.001 | 0.852   | 0.994   | 0.514  |
| ENSMUST00000066391 | 412 | V | E | Q3UZYO | 412 | V | E | benign           | neutral     | 0.001 | 0.852   | 0.994   | 0.514  |
| ENSMUST00000153425 | 381 | V | E | E9Q8V3 | 381 | V | E | benign           | neutral     | 0.002 | 0.704   | 0.987   | 0.452  |
| ENSMUST00000101649 | 371 | Q | L | Q5NBZ9 | 371 | Q | L | possiblydamaging | deleterious | 0.778 | 0.075   | 0.848   | 0.107  |
| ENSMUST00000101655 | 402 | Q | L | E9QJT8 | 402 | Q | L | possiblydamaging | deleterious | 0.95  | 0.0527  | 0.791   | 0.0828 |
| ENSMUST00000081318 | 402 | Q | L | Q3UZYO | 402 | Q | L | possiblydamaging | deleterious | 0.913 | 0.0604  | 0.813   | 0.0915 |
| ENSMUST00000140846 | 321 | Q | L | E9Q799 | 321 | Q | L | possiblydamaging | deleterious | 0.766 | 0.0764  | 0.851   | 0.108  |
| ENSMUST00000066391 | 402 | Q | L | Q3UZYO | 402 | Q | L | possiblydamaging | deleterious | 0.913 | 0.0604  | 0.813   | 0.0915 |
| ENSMUST00000153425 | 371 | Q | L | E9Q8V3 | 371 | Q | L | possiblydamaging | deleterious | 0.95  | 0.0527  | 0.791   | 0.0828 |
| ENSMUST00000101649 | 368 | N | H | Q5NBZ9 | 368 | N | H | probablydamaging | deleterious | 0.993 | 0.0301  | 0.696   | 0.0553 |
| ENSMUST00000101655 | 399 | N | H | E9QJT8 | 399 | N | H | probablydamaging | deleterious | 0.997 | 0.0167  | 0.409   | 0.0357 |
| ENSMUST00000081318 | 399 | N | H | Q3UZYO | 399 | N | H | probablydamaging | deleterious | 0.987 | 0.036   | 0.731   | 0.0626 |
| ENSMUST00000140846 | 318 | N | H | E9Q799 | 318 | N | H | probablydamaging | deleterious | 0.993 | 0.0301  | 0.696   | 0.0553 |
| ENSMUST00000066391 | 399 | N | H | Q3UZYO | 399 | N | H | probablydamaging | deleterious | 0.987 | 0.036   | 0.731   | 0.0626 |
| ENSMUST00000153425 | 368 | N | H | E9Q8V3 | 368 | N | H | probablydamaging | deleterious | 0.993 | 0.0301  | 0.696   | 0.0553 |
| ENSMUST00000101655 | 380 | T | I | E9QJT8 | 380 | T | I | benign           | neutral     | 0.002 | 0.704   | 0.987   | 0.452  |
| ENSMUST00000081318 | 380 | T | I | Q3UZYO | 380 | T | I | benign           | neutral     | 0.001 | 0.852   | 0.994   | 0.514  |

|                    |     |   |   |        |     |   |   |        |         |       |       |       |       |
|--------------------|-----|---|---|--------|-----|---|---|--------|---------|-------|-------|-------|-------|
| ENSMUST00000140846 | 299 | T | I | E9Q799 | 299 | T | I | benign | neutral | 0     | 1     | 1     | 0.575 |
| ENSMUST00000066391 | 380 | T | I | Q3UZY0 | 380 | T | I | benign | neutral | 0.001 | 0.852 | 0.994 | 0.514 |

## References and Notes

1. H. C. Morse, *Origins of Inbred Mice* (Academic Press, New York, 1979).
2. S. J. Pettitt, Q. Liang, X. Y. Rairdan, J. L. Moran, H. M. Prosser, D. R. Beier, K. C. Lloyd, A. Bradley, W. C. Skarnes, Agouti C57BL/6N embryonic stem cells for mouse genetic resources. *Nat. Methods* **6**, 493–495 (2009). [Medline doi:10.1038/nmeth.1342](#)
3. W. C. Skarnes, B. Rosen, A. P. West, M. Koutsourakis, W. Bushell, V. Iyer, A. O. Mujica, M. Thomas, J. Harrow, T. Cox, D. Jackson, J. Severin, P. Biggs, J. Fu, M. Nefedov, P. J. de Jong, A. F. Stewart, A. Bradley, A conditional knockout resource for the genome-wide study of mouse gene function. *Nature* **474**, 337–342 (2011). [Medline doi:10.1038/nature10163](#)
4. R. H. Waterston, K. Lindblad-Toh, E. Birney, J. Rogers, J. F. Abril, P. Agarwal, R. Agarwala, R. Ainscough, M. Alexandersson, P. An, S. E. Antonarakis, J. Attwood, R. Baertsch, J. Bailey, K. Barlow, S. Beck, E. Berry, B. Birren, T. Bloom, P. Bork, M. Botcherby, N. Bray, M. R. Brent, D. G. Brown, S. D. Brown, C. Bult, J. Burton, J. Butler, R. D. Campbell, P. Carninci, S. Cawley, F. Chiaromonte, A. T. Chinwalla, D. M. Church, M. Clamp, C. Clee, F. S. Collins, L. L. Cook, R. R. Copley, A. Coulson, O. Couronne, J. Cuff, V. Curwen, T. Cutts, M. Daly, R. David, J. Davies, K. D. Delehaunty, J. Deri, E. T. Dermitzakis, C. Dewey, N. J. Dickens, M. Diekhans, S. Dodge, I. Dubchak, D. M. Dunn, S. R. Eddy, L. Elnitski, R. D. Emes, P. Eswara, E. Eyra, A. Felsenfeld, G. A. Fewell, P. Flicek, K. Foley, W. N. Frankel, L. A. Fulton, R. S. Fulton, T. S. Furey, D. Gage, R. A. Gibbs, G. Glusman, S. Gnerre, N. Goldman, L. Goodstadt, D. Grafham, T. A. Graves, E. D. Green, S. Gregory, R. Guigó, M. Guyer, R. C. Hardison, D. Haussler, Y. Hayashizaki, L. W. Hillier, A. Hinrichs, W. Hlavina, T. Holzer, F. Hsu, A. Hua, T. Hubbard, A. Hunt, I. Jackson, D. B. Jaffe, L. S. Johnson, M. Jones, T. A. Jones, A. Joy, M. Kamal, E. K. Karlsson, D. Karolchik, A. Kasprzyk, J. Kawai, E. Keibler, C. Kells, W. J. Kent, A. Kirby, D. L. Kolbe, I. Korf, R. S. Kucherlapati, E. J. Kulbokas, D. Kulp, T. Landers, J. P. Leger, S. Leonard, I. Letunic, R. Levine, J. Li, M. Li, C. Lloyd, S. Lucas, B. Ma, D. R. Maglott, E. R. Mardis, L. Matthews, E. Mauceli, J. H. Mayer, M. McCarthy, W. R. McCombie, S. McLaren, K. McLay, J. D. McPherson, J. Meldrim, B. Meredith, J. P. Mesirov, W. Miller, T. L. Miner, E. Mongin, K. T. Montgomery, M. Morgan, R. Mott, J. C. Mullikin, D. M. Muzny, W. E. Nash, J. O. Nelson, M. N. Nhan, R. Nicol, Z. Ning, C. Nusbaum, M. J. O'Connor, Y. Okazaki, K. Oliver, E. Overton-Larty, L. Pachter, G. Parra, K. H. Pepin, J. Peterson, P. Pevzner, R. Plumb, C. S. Pohl, A. Poliakov, T. C. Ponce, C. P. Ponting, S. Potter, M. Quail, A. Reymond, B. A. Roe, K. M. Roskin, E. M. Rubin, A. G. Rust, R. Santos, V. Sapojnikov, B. Schultz, J. Schultz, M. S. Schwartz, S. Schwartz, C. Scott, S. Seaman, S. Searle, T. Sharpe, A. Sheridan, R. Shownkeen, S. Sims, J. B. Singer, G. Slater, A. Smit, D. R. Smith, B. Spencer, A. Stabenau, N. Stange-Thomann, C. Sugnet, M. Suyama, G. Tesler, J. Thompson, D. Torrents, E. Trevaskis, J. Tromp, C. Ucla, A. Ureta-Vidal, J. P. Vinson, A. C. Von Niederhausern, C. M. Wade, M. Wall, R. J. Weber, R. B. Weiss, M. C. Wendl, A. P. West, K. Wetterstrand, R.

- Wheeler, S. Whelan, J. Wierzbowski, D. Willey, S. Williams, R. K. Wilson, E. Winter, K. C. Worley, D. Wyman, S. Yang, S. P. Yang, E. M. Zdobnov, M. C. Zody, E. S. Lander, Initial sequencing and comparative analysis of the mouse genome. *Nature* **420**, 520–562 (2002). [Medline doi:10.1038/nature01262](#)
5. E. S. Lein, M. J. Hawrylycz, N. Ao, M. Ayres, A. Bensinger, A. Bernard, A. F. Boe, M. S. Boguski, K. S. Brockway, E. J. Byrnes, L. Chen, L. Chen, T. M. Chen, M. C. Chin, J. Chong, B. E. Crook, A. Czaplinska, C. N. Dang, S. Datta, N. R. Dee, A. L. Desaki, T. Desta, E. Diep, T. A. Dolbeare, M. J. Donelan, H. W. Dong, J. G. Dougherty, B. J. Duncan, A. J. Ebbert, G. Eichele, L. K. Estin, C. Faber, B. A. Facer, R. Fields, S. R. Fischer, T. P. Fliss, C. Frensley, S. N. Gates, K. J. Glattfelder, K. R. Halverson, M. R. Hart, J. G. Hohmann, M. P. Howell, D. P. Jeung, R. A. Johnson, P. T. Karr, R. Kawal, J. M. Kidney, R. H. Knapik, C. L. Kuan, J. H. Lake, A. R. Laramée, K. D. Larsen, C. Lau, T. A. Lemon, A. J. Liang, Y. Liu, L. T. Luong, J. Michaels, J. J. Morgan, R. J. Morgan, M. T. Mortrud, N. F. Mosqueda, L. L. Ng, R. Ng, G. J. Orta, C. C. Overly, T. H. Pak, S. E. Parry, S. D. Pathak, O. C. Pearson, R. B. Puchalski, Z. L. Riley, H. R. Rockett, S. A. Rowland, J. J. Royall, M. J. Ruiz, N. R. Sarno, K. Schaffnit, N. V. Shapovalova, T. Sivasay, C. R. Slaughterbeck, S. C. Smith, K. A. Smith, B. I. Smith, A. J. Sodt, N. N. Stewart, K. R. Stumpf, S. M. Sunkin, M. Sutram, A. Tam, C. D. Teemer, C. Thaller, C. L. Thompson, L. R. Varnam, A. Visel, R. M. Whitlock, P. E. Wohnoutka, C. K. Wolkey, V. Y. Wong, M. Wood, M. B. Yaylaoglu, R. C. Young, B. L. Youngstrom, X. F. Yuan, B. Zhang, T. A. Zwingman, A. R. Jones, Genome-wide atlas of gene expression in the adult mouse brain. *Nature* **445**, 168–176 (2007). [Medline doi:10.1038/nature05453](#)
  6. C. D. Bryant, N. N. Zhang, G. Sokoloff, M. S. Fanselow, H. S. Ennes, A. A. Palmer, J. A. McRoberts, Behavioral differences among C57BL/6 substrains: Implications for transgenic and knockout studies. *J. Neurogenet.* **22**, 315–331 (2008). [Medline doi:10.1080/01677060802357388](#)
  7. N. Matsuo, K. Takao, K. Nakanishi, N. Yamasaki, K. Tanda, T. Miyakawa, Behavioral profiles of three C57BL/6 substrains. *Front. Behav. Neurosci.* **4**, 29 (2010). [Medline](#)
  8. G. F. Koob, N. D. Volkow, Neurocircuitry of addiction. *Neuropsychopharmacology* **35**, 217–238 (2010). [Medline doi:10.1038/npp.2009.110](#)
  9. C. Lüscher, R. C. Malenka, Drug-evoked synaptic plasticity in addiction: From molecular changes to circuit remodeling. *Neuron* **69**, 650–663 (2011). [Medline doi:10.1016/j.neuron.2011.01.017](#)
  10. T. E. Robinson, K. C. Berridge, The neural basis of drug craving: An incentive-sensitization theory of addiction. *Brain Res. Brain Res. Rev.* **18**, 247–291 (1993). [Medline doi:10.1016/0165-0173\(93\)90013-P](#)
  11. E. J. Nestler, Molecular basis of long-term plasticity underlying addiction. *Nat. Rev. Neurosci.* **2**, 119–128 (2001). [Medline doi:10.1038/35053570](#)
  12. A. Cox, C. L. Ackert-Bicknell, B. L. Dumont, Y. Ding, J. T. Bell, G. A. Brockmann, J. E. Wergedal, C. Bult, B. Paigen, J. Flint, S. W. Tsaih, G. A. Churchill, K. W.

- Broman, A new standard genetic map for the laboratory mouse. *Genetics* **182**, 1335–1344 (2009). [Medline doi:10.1534/genetics.109.105486](#)
13. H. Yang, J. R. Wang, J. P. Didion, R. J. Buus, T. A. Bell, C. E. Welsh, F. Bonhomme, A. H. Yu, M. W. Nachman, J. Pialek, P. Tucker, P. Boursot, L. McMillan, G. A. Churchill, F. P. de Villena, Subspecific origin and haplotype diversity in the laboratory mouse. *Nat. Genet.* **43**, 648–655 (2011). [Medline doi:10.1038/ng.847](#)
  14. T. M. Keane, L. Goodstadt, P. Danecek, M. A. White, K. Wong, B. Yalcin, A. Heger, A. Agam, G. Slater, M. Goodson, N. A. Furlotte, E. Eskin, C. Nellåker, H. Whitley, J. Cleak, D. Janowitz, P. Hernandez-Pliego, A. Edwards, T. G. Belgard, P. L. Oliver, R. E. McIntyre, A. Bhomra, J. Nicod, X. Gan, W. Yuan, L. van der Weyden, C. A. Steward, S. Bala, J. Stalker, R. Mott, R. Durbin, I. J. Jackson, A. Czechanski, J. A. Guerra-Assunção, L. R. Donahue, L. G. Reinholdt, B. A. Payseur, C. P. Ponting, E. Birney, J. Flint, D. J. Adams, Mouse genomic variation and its effect on phenotypes and gene regulation. *Nature* **477**, 289–294 (2011). [Medline doi:10.1038/nature10413](#)
  15. I. A. Adzhubei, S. Schmidt, L. Peshkin, V. E. Ramensky, A. Gerasimova, P. Bork, A. S. Kondrashov, S. R. Sunyaev, A method and server for predicting damaging missense mutations. *Nat. Methods* **7**, 248–249 (2010). [Medline doi:10.1038/nmeth0410-248](#)
  16. Z. Chen, D. Borek, S. B. Padrick, T. S. Gomez, Z. Metlagel, A. M. Ismail, J. Umetani, D. D. Billadeau, Z. Otwinowski, M. K. Rosen, Structure and control of the actin regulatory WAVE complex. *Nature* **468**, 533–538 (2010). [Medline doi:10.1038/nature09623](#)
  17. I. Napoli, V. Mercaldo, P. P. Boyle, B. Eleuteri, F. Zalfa, S. De Rubeis, D. Di Marino, E. Mohr, M. Massimi, M. Falconi, W. Witke, M. Costa-Mattioli, N. Sonenberg, T. Achsel, C. Bagni, The fragile X syndrome protein represses activity-dependent translation through CYFIP1, a new 4E-BP. *Cell* **134**, 1042–1054 (2008). [Medline doi:10.1016/j.cell.2008.07.031](#)
  18. A. Qurashi, H. B. Sahin, P. Carrera, A. Gautreau, A. Schenck, A. Giangrande, HSPC300 and its role in neuronal connectivity. *Neural Dev.* **2**, 18 (2007). [Medline doi:10.1186/1749-8104-2-18](#)
  19. A. Schenck, A. Qurashi, P. Carrera, B. Bardoni, C. Diebold, E. Schejter, J. L. Mandel, A. Giangrande, WAVE/SCAR, a multifunctional complex coordinating different aspects of neuronal connectivity. *Dev. Biol.* **274**, 260–270 (2004). [Medline doi:10.1016/j.ydbio.2004.07.009](#)
  20. S. H. Soderling, E. S. Guire, S. Kaech, J. White, F. Zhang, K. Schutz, L. K. Langeberg, G. Banker, J. Raber, J. D. Scott, A WAVE-1 and WRP signaling complex regulates spine density, synaptic plasticity, and memory. *J. Neurosci.* **27**, 355–365 (2007). [Medline doi:10.1523/JNEUROSCI.3209-06.2006](#)
  21. S. H. Soderling, L. K. Langeberg, J. A. Soderling, S. M. Davee, R. Simerly, J. Raber, J. D. Scott, Loss of WAVE-1 causes sensorimotor retardation and reduced learning and memory in mice. *Proc. Natl. Acad. Sci. U.S.A.* **100**, 1723–1728 (2003). [Medline doi:10.1073/pnas.0438033100](#)

22. Y. Kim, J. Y. Sung, I. Ceglia, K. W. Lee, J. H. Ahn, J. M. Halford, A. M. Kim, S. P. Kwak, J. B. Park, S. Ho Ryu, A. Schenck, B. Bardoni, J. D. Scott, A. C. Nairn, P. Greengard, Phosphorylation of WAVE1 regulates actin polymerization and dendritic spine morphology. *Nature* **442**, 814–817 (2006). [Medline](#)  
[doi:10.1038/nature04976](https://doi.org/10.1038/nature04976)
23. S. Bogdan, O. Grewe, M. Strunk, A. Mertens, C. Klämbt, Sra-1 interacts with Kette and Wasp and is required for neuronal and bristle development in *Drosophila*. *Development* **131**, 3981–3989 (2004). [Medline](#) [doi:10.1242/dev.01274](https://doi.org/10.1242/dev.01274)
24. V. Kumar, K. Kim, C. Joseph, L. C. Thomas, H. Hong, J. S. Takahashi, Second-generation high-throughput forward genetic screen in mice to isolate subtle behavioral mutants. *Proc. Natl. Acad. Sci. U.S.A.* **108** (suppl. 3), 15557–15564 (2011). [Medline](#) [doi:10.1073/pnas.1107726108](https://doi.org/10.1073/pnas.1107726108)
25. [http://ncifrederick.cancer.gov/research/animal\\_production\\_program/strain\\_information/01C55.asp](http://ncifrederick.cancer.gov/research/animal_production_program/strain_information/01C55.asp).
26. C. M. Wade, E. J. Kulbokas 3rd, A. W. Kirby, M. C. Zody, J. C. Mullikin, E. S. Lander, K. Lindblad-Toh, M. J. Daly, The mosaic structure of variation in the laboratory mouse genome. *Nature* **420**, 574–578 (2002). [Medline](#)  
[doi:10.1038/nature01252](https://doi.org/10.1038/nature01252)
27. T. P. Maddatu, S. C. Grubb, C. J. Bult, M. A. Bogue, Mouse Phenome Database (MPD). *Nucleic Acids Res.* **40**, D887–D894 (2012). [Medline](#)  
[doi:10.1093/nar/gkr1061](https://doi.org/10.1093/nar/gkr1061)
28. A. Kirby, H. M. Kang, C. M. Wade, C. Cotsapas, E. Kostem, B. Han, N. Furlotte, E. Y. Kang, M. Rivas, M. A. Bogue, K. A. Frazer, F. M. Johnson, E. J. Beilharz, D. R. Cox, E. Eskin, M. J. Daly, Fine mapping in 94 inbred mouse strains using a high-density haplotype resource. *Genetics* **185**, 1081–1095 (2010). [Medline](#)  
[doi:10.1534/genetics.110.115014](https://doi.org/10.1534/genetics.110.115014)
29. K. L. Svenson, D. M. Gatti, W. Valdar, C. E. Welsh, R. Cheng, E. J. Chesler, A. A. Palmer, L. McMillan, G. A. Churchill, High-resolution genetic mapping using the Mouse Diversity outbred population. *Genetics* **190**, 437–447 (2012). [Medline](#)  
[doi:10.1534/genetics.111.132597](https://doi.org/10.1534/genetics.111.132597)
30. K. W. Broman, H. Wu, S. Sen, G. A. Churchill, R/qtl: QTL mapping in experimental crosses. *Bioinformatics* **19**, 889–890 (2003). [Medline](#)  
[doi:10.1093/bioinformatics/btg112](https://doi.org/10.1093/bioinformatics/btg112)
31. K. W. Broman, S. Sen, *A Guide to Qtl Mapping with R/Qtl* (Statistics for Biology and Health, Springer, Dordrecht, Netherlands, 2009).
32. J. Dupuis, D. Siegmund, Statistical methods for mapping quantitative trait loci from a dense set of markers. *Genetics* **151**, 373–386 (1999). [Medline](#)
33. S. Sen, G. A. Churchill, A statistical framework for quantitative trait mapping. *Genetics* **159**, 371–387 (2001). [Medline](#)
34. J. Wang, M. Lin, A. Crenshaw, A. Hutchinson, B. Hicks, M. Yeager, S. Berndt, W. Y. Huang, R. B. Hayes, S. J. Chanock, R. C. Jones, R. Ramakrishnan, High-



- throughput single nucleotide polymorphism genotyping using nanofluidic Dynamic Arrays. *BMC Genomics* **10**, 561 (2009). [Medline doi:10.1186/1471-2164-10-561](#)
35. S. L. Spurgeon, R. C. Jones, R. Ramakrishnan, High throughput gene expression measurement with real time PCR in a microfluidic dynamic array. *PLOS ONE* **3**, e1662 (2008). [Medline doi:10.1371/journal.pone.0001662](#)
  36. H. Li, B. Handsaker, A. Wysoker, T. Fennell, J. Ruan, N. Homer, G. Marth, G. Abecasis, R. Durbin, 1000 Genome Project Data Processing Subgroup, The Sequence Alignment/Map format and SAMtools. *Bioinformatics* **25**, 2078–2079 (2009). [Medline doi:10.1093/bioinformatics/btp352](#)
  37. A. McKenna, M. Hanna, E. Banks, A. Sivachenko, K. Cibulskis, A. Kernysky, K. Garimella, D. Altshuler, S. Gabriel, M. Daly, M. A. DePristo, The Genome Analysis Toolkit: A MapReduce framework for analyzing next-generation DNA sequencing data. *Genome Res.* **20**, 1297–1303 (2010). [Medline doi:10.1101/gr.107524.110](#)
  38. P. Cingolani, A. Platts, L. Wang, M. Coon, T. Nguyen, L. Wang, S. J. Land, X. Lu, D. M. Ruden, A program for annotating and predicting the effects of single nucleotide polymorphisms, SnpEff: SNPs in the genome of *Drosophila melanogaster* strain w1118; iso-2; iso-3. *Fly* **6**, 80–92 (2012). [Medline doi:10.4161/fly.19695](#)
  39. K. Wong, T. M. Keane, J. Stalker, D. J. Adams, Enhanced structural variant and breakpoint detection using SVMerge by integration of multiple detection methods and local assembly. *Genome Biol.* **11**, R128 (2010). [Medline doi:10.1186/gb-2010-11-12-r128](#)
  40. K. Chen, J. W. Wallis, M. D. McLellan, D. E. Larson, J. M. Kalicki, C. S. Pohl, S. D. McGrath, M. C. Wendl, Q. Zhang, D. P. Locke, X. Shi, R. S. Fulton, T. J. Ley, R. K. Wilson, L. Ding, E. R. Mardis, BreakDancer: An algorithm for high-resolution mapping of genomic structural variation. *Nat. Methods* **6**, 677–681 (2009). [Medline doi:10.1038/nmeth.1363](#)
  41. K. Ye, M. H. Schulz, Q. Long, R. Apweiler, Z. Ning, Pindel: A pattern growth approach to detect break points of large deletions and medium sized insertions from paired-end short reads. *Bioinformatics* **25**, 2865–2871 (2009). [Medline doi:10.1093/bioinformatics/btp394](#)
  42. J. T. Simpson, R. E. McIntyre, D. J. Adams, R. Durbin, Copy number variant detection in inbred strains from short read sequence data. *Bioinformatics* **26**, 565–567 (2010). [Medline doi:10.1093/bioinformatics/btp693](#)
  43. S. M. Siepkka, S. H. Yoo, J. Park, W. Song, V. Kumar, Y. Hu, C. Lee, J. S. Takahashi, Circadian mutant Overtime reveals F-box protein FBXL3 regulation of cryptochrome and period gene expression. *Cell* **129**, 1011–1023 (2007). [Medline doi:10.1016/j.cell.2007.04.030](#)
  44. H. Motulsky, A. Christopoulos, *Fitting Models to Biological Data Using Linear and Nonlinear Regression: A Practical Guide to Curve Fitting* (Oxford Univ. Press,

- New York, 2004).
45. W. B. Gan, J. Grutzendler, W. T. Wong, R. O. Wong, J. W. Lichtman, Multicolor “DiOlistic” labeling of the nervous system using lipophilic dye combinations. *Neuron* **27**, 219–225 (2000). [Medline doi:10.1016/S0896-6273\(00\)00031-3](#)
  46. A. Rodriguez, D. B. Ehlenberger, D. L. Dickstein, P. R. Hof, S. L. Wearne, Automated three-dimensional detection and shape classification of dendritic spines from fluorescence microscopy images. *PLOS ONE* **3**, e1997 (2008). [Medline doi:10.1371/journal.pone.0001997](#)
  47. A. Rodriguez, D. B. Ehlenberger, P. R. Hof, S. L. Wearne, Rayburst sampling, an algorithm for automated three-dimensional shape analysis from laser scanning microscopy images. *Nat. Protoc.* **1**, 2152–2161 (2006). [Medline doi:10.1038/nprot.2006.313](#)
  48. D. Dumitriu, Q. Laplant, Y. S. Grossman, C. Dias, W. G. Janssen, S. J. Russo, J. H. Morrison, E. J. Nestler, Subregional, dendritic compartment, and spine subtype specificity in cocaine regulation of dendritic spines in the nucleus accumbens. *J. Neurosci.* **32**, 6957–6966 (2012). [Medline doi:10.1523/JNEUROSCI.5718-11.2012](#)
  49. D. Dumitriu, A. Rodriguez, J. H. Morrison, High-throughput, detailed, cell-specific neuroanatomy of dendritic spines using microinjection and confocal microscopy. *Nat. Protoc.* **6**, 1391–1411 (2011). [Medline doi:10.1038/nprot.2011.389](#)
  50. S. Kourrich, P. E. Rothwell, J. R. Klug, M. J. Thomas, Cocaine experience controls bidirectional synaptic plasticity in the nucleus accumbens. *J. Neurosci.* **27**, 7921–7928 (2007). [Medline doi:10.1523/JNEUROSCI.1859-07.2007](#)
  51. R. Guerois, J. E. Nielsen, L. Serrano, Predicting changes in the stability of proteins and protein complexes: A study of more than 1000 mutations. *J. Mol. Biol.* **320**, 369–387 (2002). [Medline doi:10.1016/S0022-2836\(02\)00442-4](#)
  52. D. Warde-Farley, S. L. Donaldson, O. Comes, K. Zuberi, R. Badrawi, P. Chao, M. Franz, C. Grouios, F. Kazi, C. T. Lopes, A. Maitland, S. Mostafavi, J. Montojo, Q. Shao, G. Wright, G. D. Bader, Q. Morris, The GeneMANIA prediction server: Biological network integration for gene prioritization and predicting gene function. *Nucleic Acids Res.* **38**, W214–W220 (2010). [Medline doi:10.1093/nar/gkq537](#)
  53. A. Schenck, B. Bardoni, C. Langmann, N. Harden, J. L. Mandel, A. Giangrande, CYFIP/Sra-1 controls neuronal connectivity in *Drosophila* and links the Rac1 GTPase pathway to the fragile X protein. *Neuron* **38**, 887–898 (2003). [Medline doi:10.1016/S0896-6273\(03\)00354-4](#)
  54. A. J. Pittman, J. A. Gaynes, C. B. Chien, nev (cyfip2) is required for retinal lamination and axon guidance in the zebrafish retinotectal system. *Dev. Biol.* **344**, 784–794 (2010). [Medline doi:10.1016/j.ydbio.2010.05.512](#)
  55. O. Bozdagi, T. Sakurai, N. Dorr, M. Pilorge, N. Takahashi, J. D. Buxbaum, Haploinsufficiency of Cyfip1 produces fragile X-like phenotypes in mice. *PLOS ONE* **7**, e42422 (2012). [Medline doi:10.1371/journal.pone.0042422](#)

56. S. Eden, R. Rohatgi, A. V. Podtelejnikov, M. Mann, M. W. Kirschner, Mechanism of regulation of WAVE1-induced actin nucleation by Rac1 and Nck. *Nature* **418**, 790–793 (2002). [Medline doi:10.1038/nature00859](#)
57. D. M. Dietz, H. Sun, M. K. Lobo, M. E. Cahill, B. Chadwick, V. Gao, J. W. Koo, M. S. Mazei-Robison, C. Dias, I. Maze, D. Damez-Werno, K. C. Dietz, K. N. Scobie, D. Ferguson, D. Christoffel, Y. Ohnishi, G. E. Hodes, Y. Zheng, R. L. Neve, K. M. Hahn, S. J. Russo, E. J. Nestler, Rac1 is essential in cocaine-induced structural plasticity of nucleus accumbens neurons. *Nat. Neurosci.* **15**, 891–896 (2012). [Medline doi:10.1038/nn.3094](#)
58. A. Rothenfluh, C. W. Cowan, Emerging roles of actin cytoskeleton regulating enzymes in drug addiction: Actin or reactin'? *Curr. Opin. Neurobiol.* **23**, 507–512 (2013). [Medline doi:10.1016/j.conb.2013.01.027](#)
59. P. W. Kalivas, Glutamate systems in cocaine addiction. *Curr. Opin. Pharmacol.* **4**, 23–29 (2004). [Medline doi:10.1016/j.coph.2003.11.002](#)
60. T. M. Tzschentke, W. J. Schmidt, Glutamatergic mechanisms in addiction. *Mol. Psychiatry* **8**, 373–382 (2003). [Medline doi:10.1038/sj.mp.4001269](#)
